# Supplementary material for: A Quasi Real-Time Evaluation of High-Resolution Mass Spectra of Complex Chlorinated Paraffin Mixtures and Their Transformation Products
Source: PubMed Central journal article supplement (PMC11295122; doi:10.1021/acs.analchem.4c01723), 2024-07-16
Supplement: ac4c01723_si_001.pdf [file ac4c01723_si_001.pdf]

# Supporting information

## A Quasi Real-Time Evaluation of High-Resolution Mass Spectra of Complex Chlorinated Paraffins Mixtures and their Transformation

### Products

Oscar Mendo Diaz <sup>\*, a, b</sup>, Luc Patiny <sup>c</sup>, Adriana Tell <sup>a, d</sup>, Jules Hutter <sup>a</sup>, Marco Knobloch <sup>e</sup>, Urs Stalder <sup>b</sup>, Susanne Kern <sup>d</sup>, Laurent Bigler <sup>b</sup>, Norbert Heeb <sup>a</sup>, Davide Bleiner <sup>a, b</sup>

<sup>a</sup> Empa Materials Science and Technology, Überlandstrasse 129, Dübendorf, CH 8600

<sup>b</sup> UZH, Winterthurerstrasse 190, Zürich, CH 8057

<sup>c</sup> Zakodium Sàrl, Route d'Echandens 6b, Lonay, CH 1027

<sup>d</sup> ZHAW Zürcher Hochschule für Angewandte Wissenschaften Departement Life Sciences und Facility Management

Einsiedlerstrasse 31, Wädenswil, CH 8820

<sup>e</sup> Suisse Office fédéral de la sécurité alimentaire et des affaires vétérinaires, Bern, CH 3003

\*Email: oscar.mendodiaz@empa.ch

**\*Corresponding author:**

Oscar Mendo Diaz

Email: [oscar.mendodiaz@empa.ch](mailto:oscar.mendodiaz@empa.ch)

Überlandstrasse 129, 8600 Dübendorf, Switzerland

**ORCID**

Oscar Mendo Diaz: 0000-0003-2469-269X

Supporting information contains schematic representations of methods explained in the experimental section, , total and extracted ion chromatograms of samples P1, P2 and P3, reconstructed mass spectra of samples P1, P2 and P3, carbon- and chlorine-homologue distributions of samples P2 and P3 and fingerprint patterns of P1, P2 and P3. Sample P1 was evaluated by CP-Hunter and RASER. Supporting tables corresponding to the figures are provided as well.

## **Table of Content**

|                                                                                                                                                                     |            |
|---------------------------------------------------------------------------------------------------------------------------------------------------------------------|------------|
| <b>Supporting figures</b> .....                                                                                                                                     | <b>S6</b>  |
| <b>Figure S1.</b> Workflow of the R-based automatic spectra evaluation routine (RASER) .....                                                                        | <b>S6</b>  |
| <b>Figure S2.</b> Workflow of the fingerprinting method of CPs and transformation products.....                                                                     | <b>S7</b>  |
| <b>Figure S3.</b> Total and extracted ion chromatograms of the sewage sludge (P1) .....                                                                             | <b>S8</b>  |
| <b>Figure S4.</b> Total and extracted ion chromatograms of the yoga mat (P2).....                                                                                   | <b>S9</b>  |
| <b>Figure S5.</b> Total and extracted ion chromatograms of the coating of an electronic cable (P3).....                                                             | <b>S10</b> |
| <b>Figure S6.</b> Measured and reconstructed mass spectra of CPs, COs, CdiOs and CtriOs of P1 .....                                                                 | <b>S11</b> |
| <b>Figure S7.</b> Measured and reconstructed mass spectra of CPs, COs, CdiOs and CtriOs of P2 .....                                                                 | <b>S12</b> |
| <b>Figure S8.</b> Measured and reconstructed mass spectra of CPs, COs, CdiOs and CtriOs of P3 .....                                                                 | <b>S13</b> |
| <b>Figure S9.</b> Distributions of C- and Cl-homologues of CPs, COs, CdiOs and CtriOs in P2 and P3 .....                                                            | <b>S14</b> |
| <b>Figure S10.</b> Fingerprint of CPs of P1 evaluated by CP-Hunter and RASER .....                                                                                  | <b>S15</b> |
| <b>Figure S11.</b> Fingerprint of CPs and transformation products of P2 and P3 .....                                                                                | <b>S16</b> |
| <br>                                                                                                                                                                |            |
| <b>Supporting tables</b> .....                                                                                                                                      | <b>S17</b> |
| <b>Table S1.</b> Number of ions and homologues searched for and detected in P1 (evaluated by CP-Hunter and RASER), P2 and P3.....                                   | <b>S17</b> |
| <b>Table S2.</b> Normalized proportions (%) of CPs, COs, CdiOs and CtriOs of P1 evaluated by CP-Hunter.....                                                         | <b>S18</b> |
| <b>Table S3.</b> Normalized proportions (%) of CPs, COs, CdiOs and CtriOs of P2.....                                                                                | <b>S19</b> |
| <b>Table S4.</b> Normalized proportions (%) of CPs, COs, CdiOs and CtriOs of P3.....                                                                                | <b>S22</b> |
| <b>Table S5.</b> Normalized proportions (%) of CPs, COs, CdiOs and CtriOs of P1 evaluated by RASER ...                                                              | <b>S24</b> |
| <b>Table S6.</b> Proportions of very short-, short-, medium-, long- and very long-chain materials in samples P1 (evaluated by CP-Hunter and RASER), P2 and P3 ..... | <b>S26</b> |
| <b>Table S7.</b> Proportions of CPs, COs, CdiOs and CtriOs per C-homologue (C <sub>10-30</sub> ) in P1 evaluated by CP-Hunter and RASER .....                       | <b>S27</b> |
| <b>Table S8.</b> Proportions of CPs, COs, CdiOs and CtriOs per C-homologue (C <sub>10-30</sub> ) in P2 and P3.....                                                  | <b>S28</b> |
| <b>Table S9.</b> Distributions of Cl-homologues per carbon-chain length of CPs, COs, CdiOs and CtriOs in sewage sludge (P1) evaluated by CP-Hunter .....            | <b>S29</b> |
| <b>Table S10.</b> Distributions of Cl-homologues per carbon-chain length of CPs, COs, CdiOs and CtriOs in the sewage sludge (P1) evaluated by RASER.....            | <b>S31</b> |

|                                                                                                                                                                                      |     |
|--------------------------------------------------------------------------------------------------------------------------------------------------------------------------------------|-----|
| <b>Table S11.</b> Distributions of Cl-homologues per carbon-chain length of CPs, COs, CdiOs and CtriOs in the yoga mat (P2).....                                                     | S33 |
| <b>Table S12.</b> Distributions of Cl-homologues per carbon-chain length of CPs, COs, CdiOs and CtriOs in the coating of an electronic cable (P3) .....                              | S35 |
| <b>Table S13.</b> Chlorine- ( $n_{Cl}$ ) numbers of CPs, COs, CdiOs and CtriOs per C-homologue ( $C_{10-30}$ ) in the sewage sludge (P1) evaluated by CP-Hunter and RASER.....       | S37 |
| <b>Table S14.</b> Chlorine- ( $n_{Cl}$ ) numbers of CPs, COs, CdiOs and CtriOs per C-homologue ( $C_{10-30}$ ) in the yoga mat (P2) and the coating of an electronic cable (P3)..... | S38 |
| <b>Table S15.</b> Carbon- ( $n_C$ ) numbers of CPs, COs, CdiOs and CtriOs per C-homologue ( $C_{13-14}$ ) in the sewage sludge (P1) evaluated by CP-Hunter and RASER .....           | S39 |
| <b>Table S16.</b> Carbon- ( $n_C$ ) numbers of CPs, COs, CdiOs and CtriOs per C-homologue ( $C_{13-14}$ ) in the yoga mat (P2) and the coating of an electronic cable (P3).....      | S40 |
| <b>References</b> .....                                                                                                                                                              | S41 |

## Supporting figures

**Figure S1.** Workflow of the R-based automatic spectra evaluation routine (RASER) used in the mass spectrometric data evaluation.<sup>1</sup>

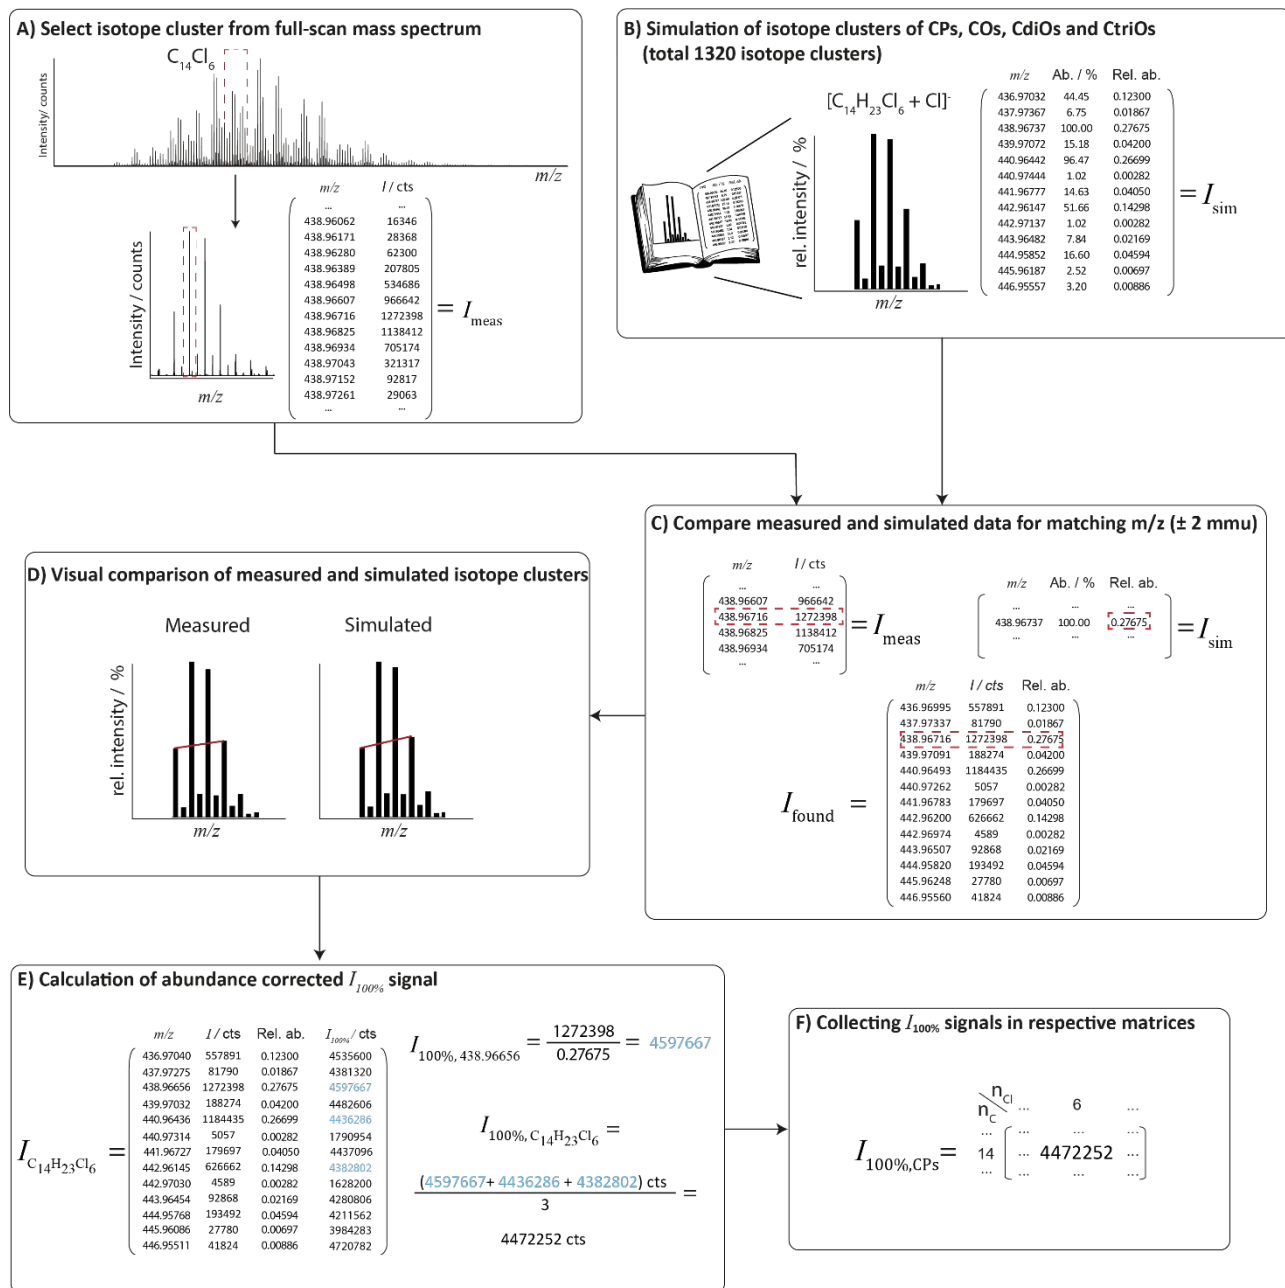

**Figure S2.** Workflow of the fingerprinting method of CPs, COs, CdiOs and CtriOs.<sup>2</sup>

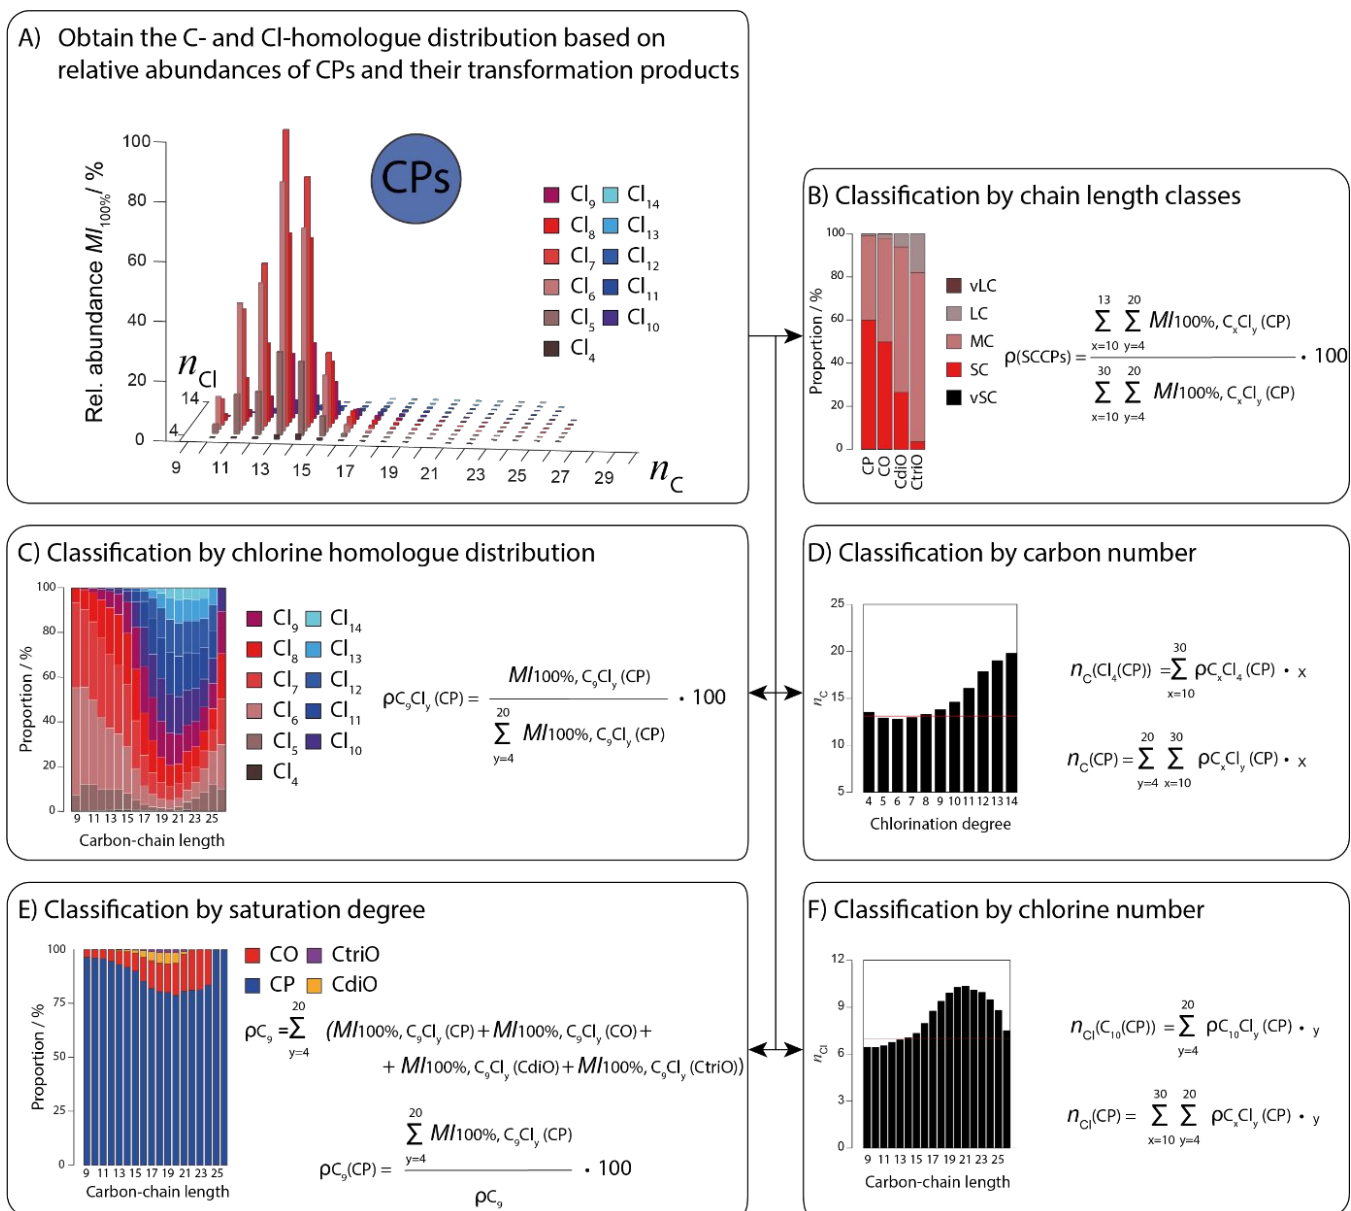

**Figure S3.** Total ion chromatogram (TIC, top), extracted ion chromatograms of  $C_nCl_6$ -homologues (EIC, middle) and extracted ion chromatograms of  $C_{26}Cl_x$ -homologues and internal standard  $[^{13}C]_{10}H_{16}Cl_6$  (EIC, bottom) of chlorinated paraffins of the sewage sludge (P1). Zoom factor of the EIC of the internal standard is indicated.

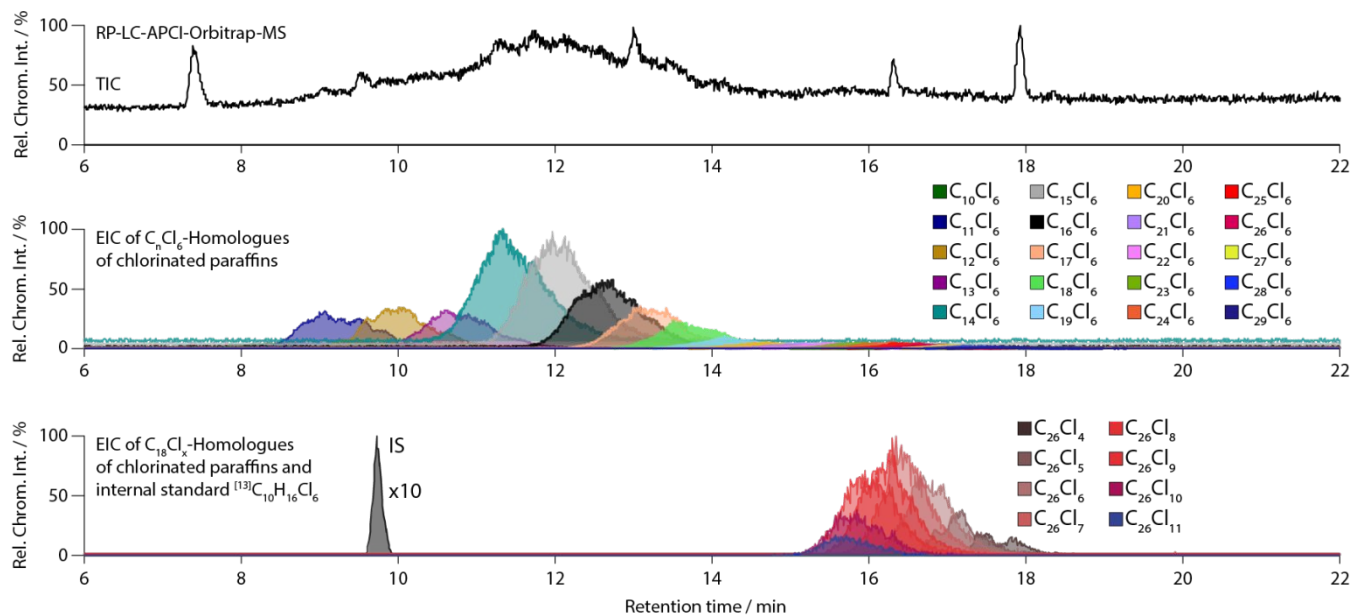



**Figure S4.** Total ion chromatogram (TIC, top), extracted ion chromatograms of  $C_nCl_6$ -homologues (EIC, middle) and extracted ion chromatograms of  $C_{16}Cl_x$ -homologues and internal standard  $[^{13}C]_{10}H_{16}Cl_6$  (EIC, bottom) of chlorinated paraffins of the yoga mat (P2). Zoom factor of the EIC of the internal standard is indicated.

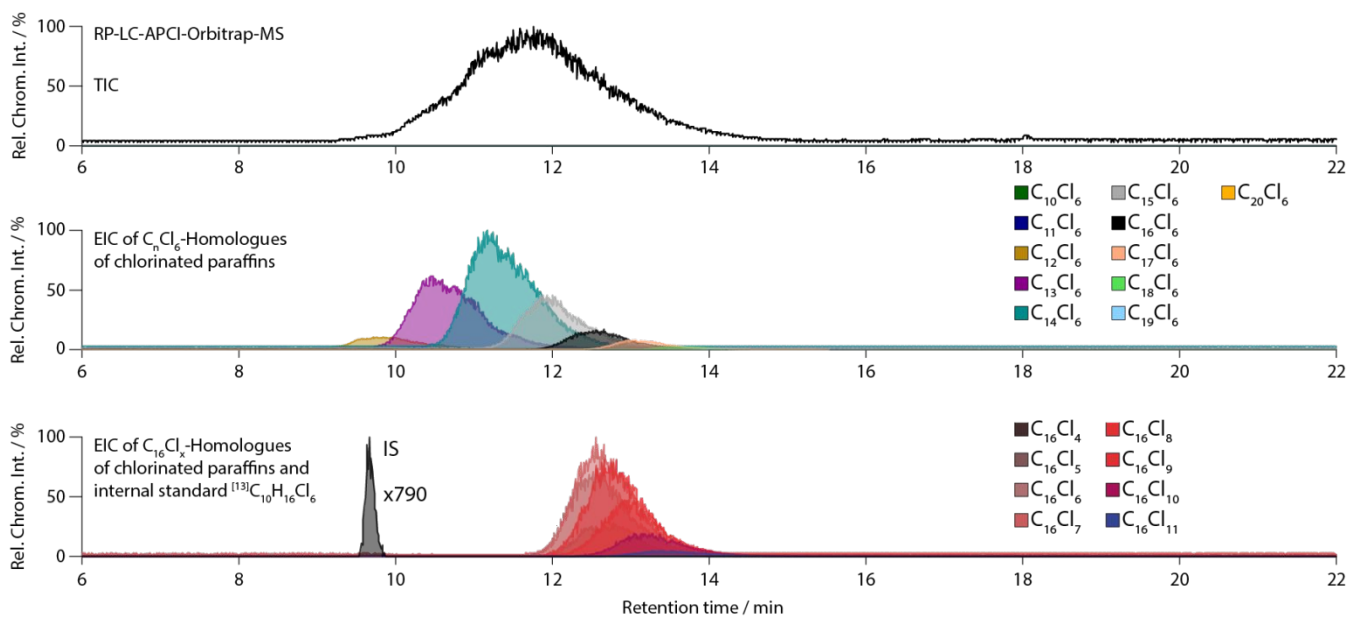

**Figure S5.** Total ion chromatogram (TIC, top), extracted ion chromatograms of  $C_nCl_6$ -homologues (EIC, middle) and extracted ion chromatograms of  $C_{13}Cl_x$ -homologues and internal standard  $[^{13}C]_{10}H_{16}Cl_6$  (EIC, bottom) of chlorinated paraffins of the coating of an electronic cable (P3). Zoom factor of the EIC of the internal standard is indicated.

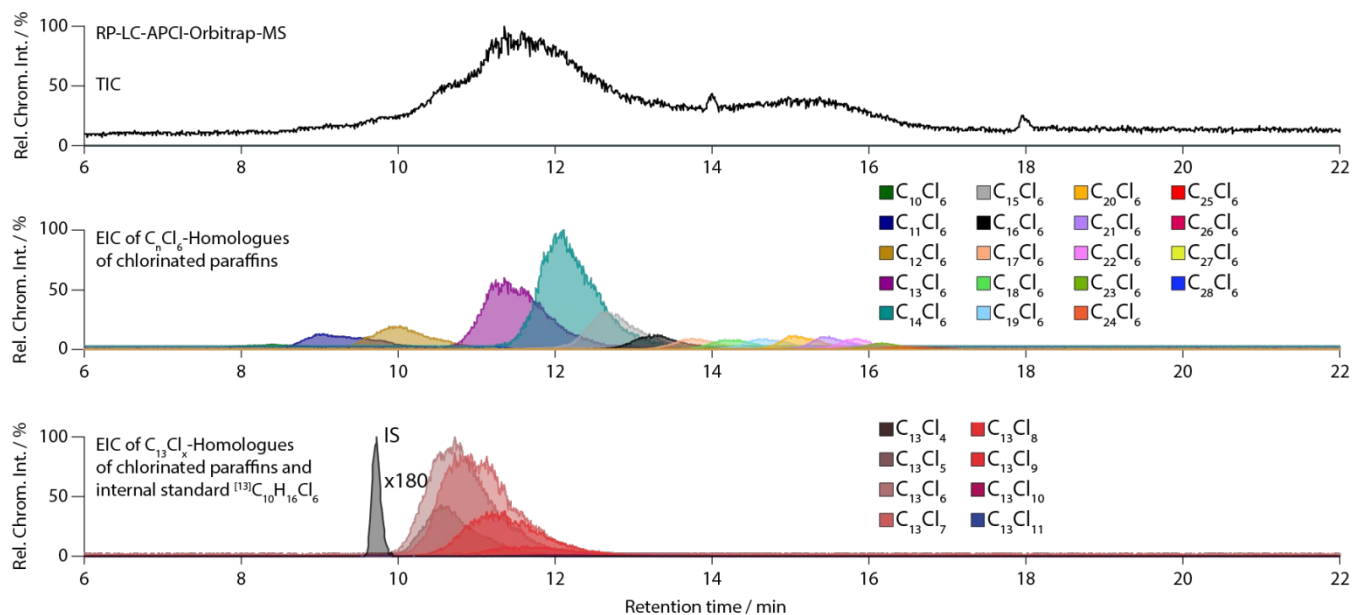

**Figure S6.** Measured full-scan (A) and reconstructed mass spectra (RMS) of the sewage sludge (P1). The RMS correspond to C- and Cl-homologues of CPs (B), COs (C), CdiOs (D) and CtriOs (E) compound classes. Number of homologues searched for and found together with the zoom factors based on the most abundant homologue and percentage of MS signals assigned are depicted. Respective data are given in Table S1.

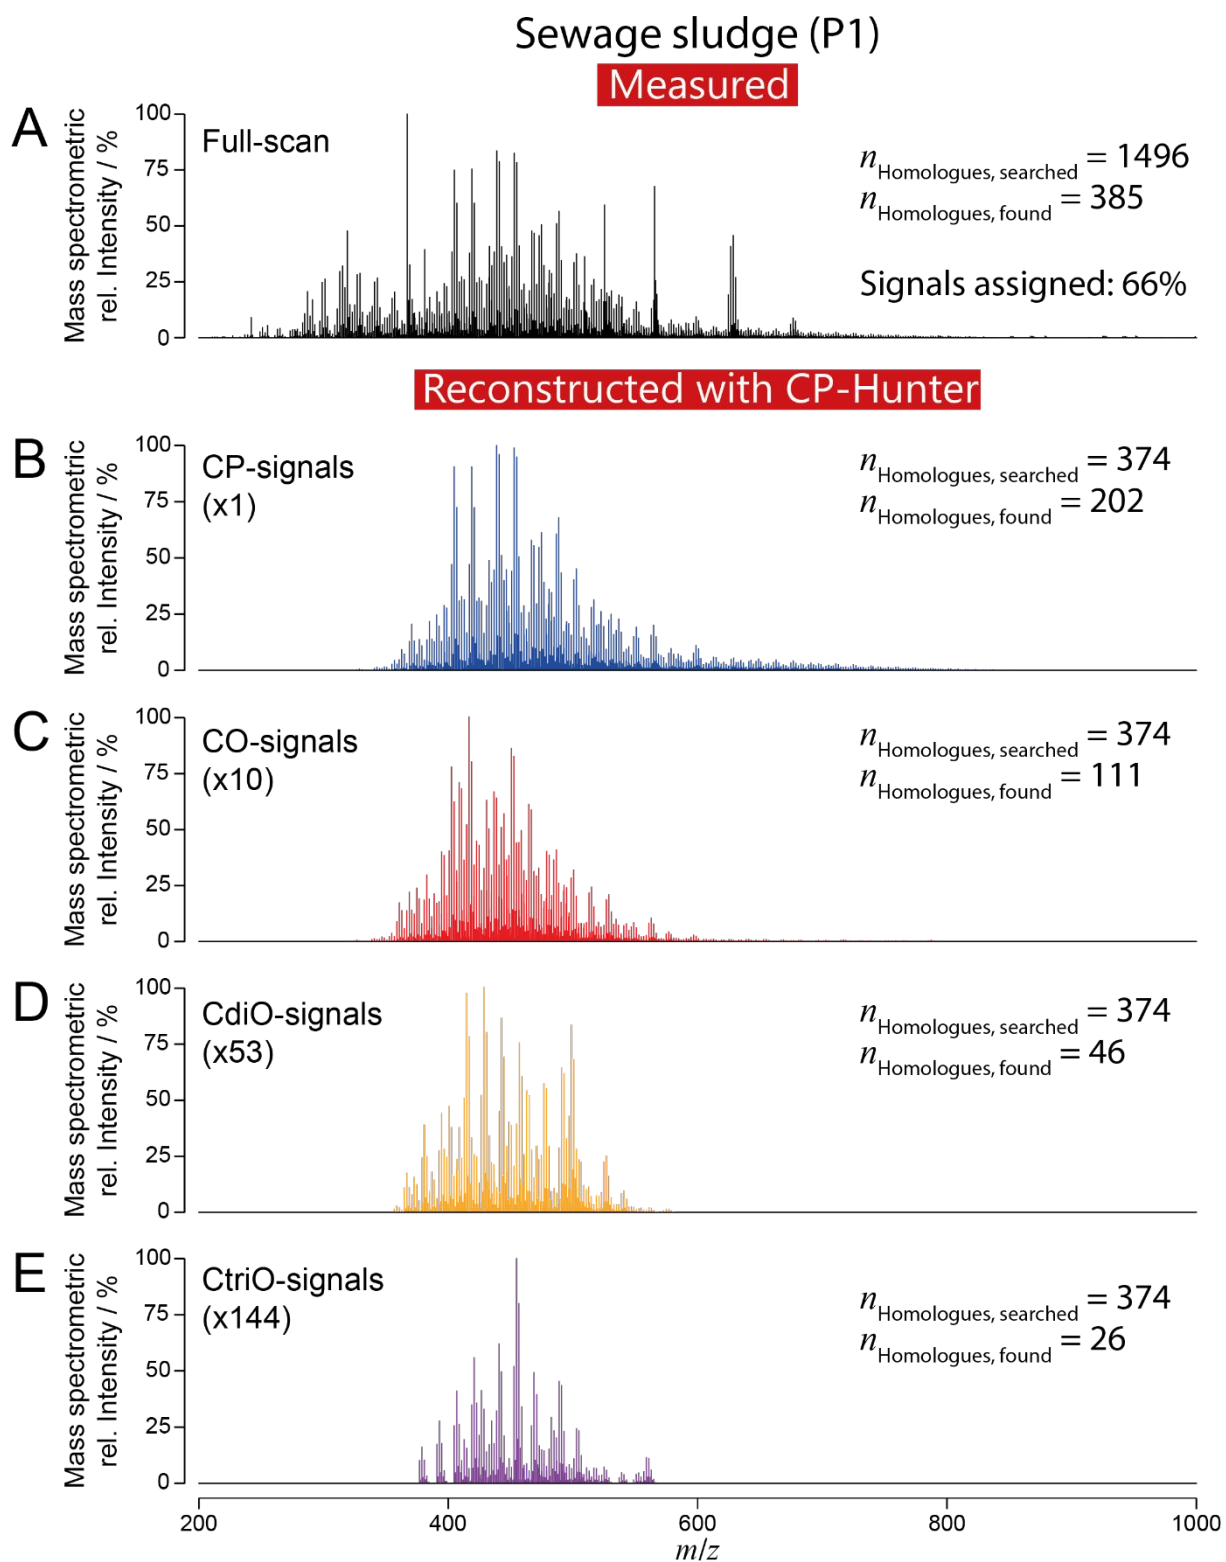

**Figure S7.** Measured full-scan (A) and reconstructed mass spectra (RMS) of the yoga mat (P2). The RMS correspond to C- and Cl-homologues of CPs (B), COs (C), CdiOs (D) and CtriOs (E) compound classes. Number of homologues searched for and found together with the zoom factors based on the most abundant homologue and percentage of MS signals assigned are depicted. Respective data are given in Table S1.

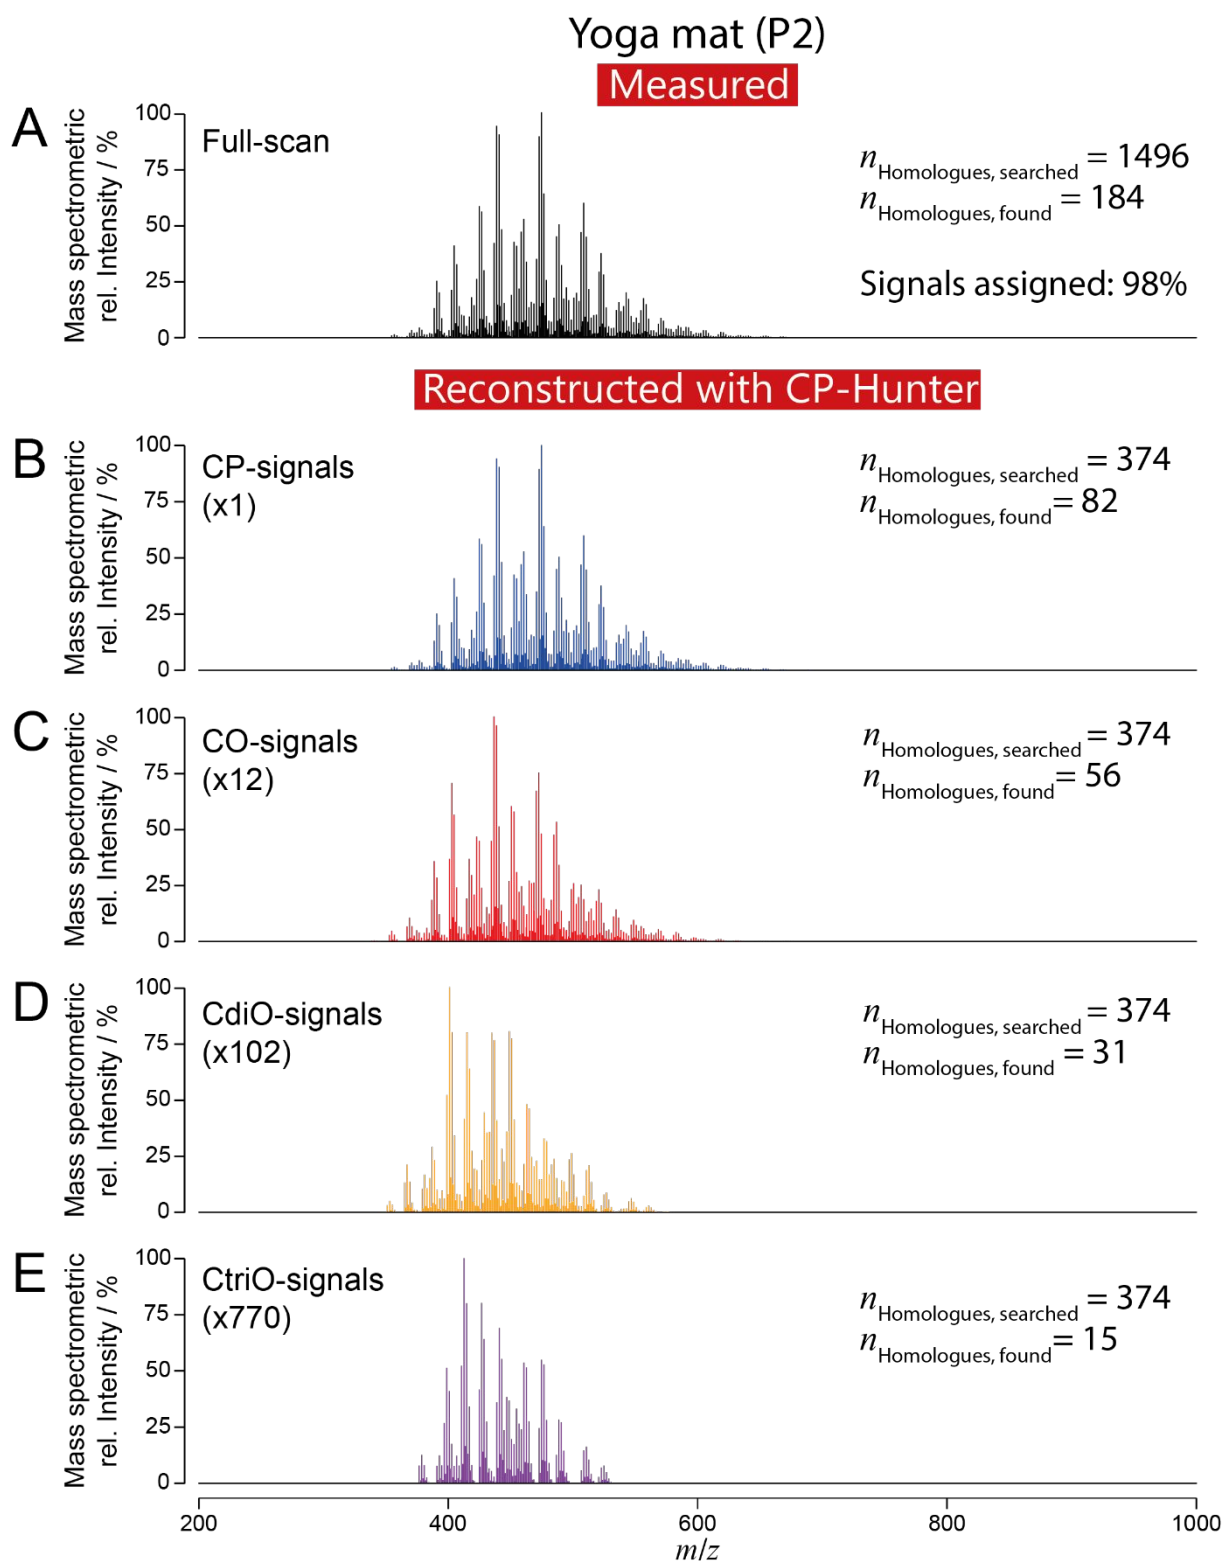

**Figure S8.** Measured full-scan (A) and reconstructed mass spectra (RMS) of the coating of an electronic cable (P3). The RMS correspond to C- and Cl-homologues of CPs (B), COs (C), CdiOs (D) and CtriOs (E) compound classes. Number of homologues searched for and found together with the zoom factors based on the most abundant homologue and percentage of MS signals assigned are depicted. Respective data are given in Table S1.

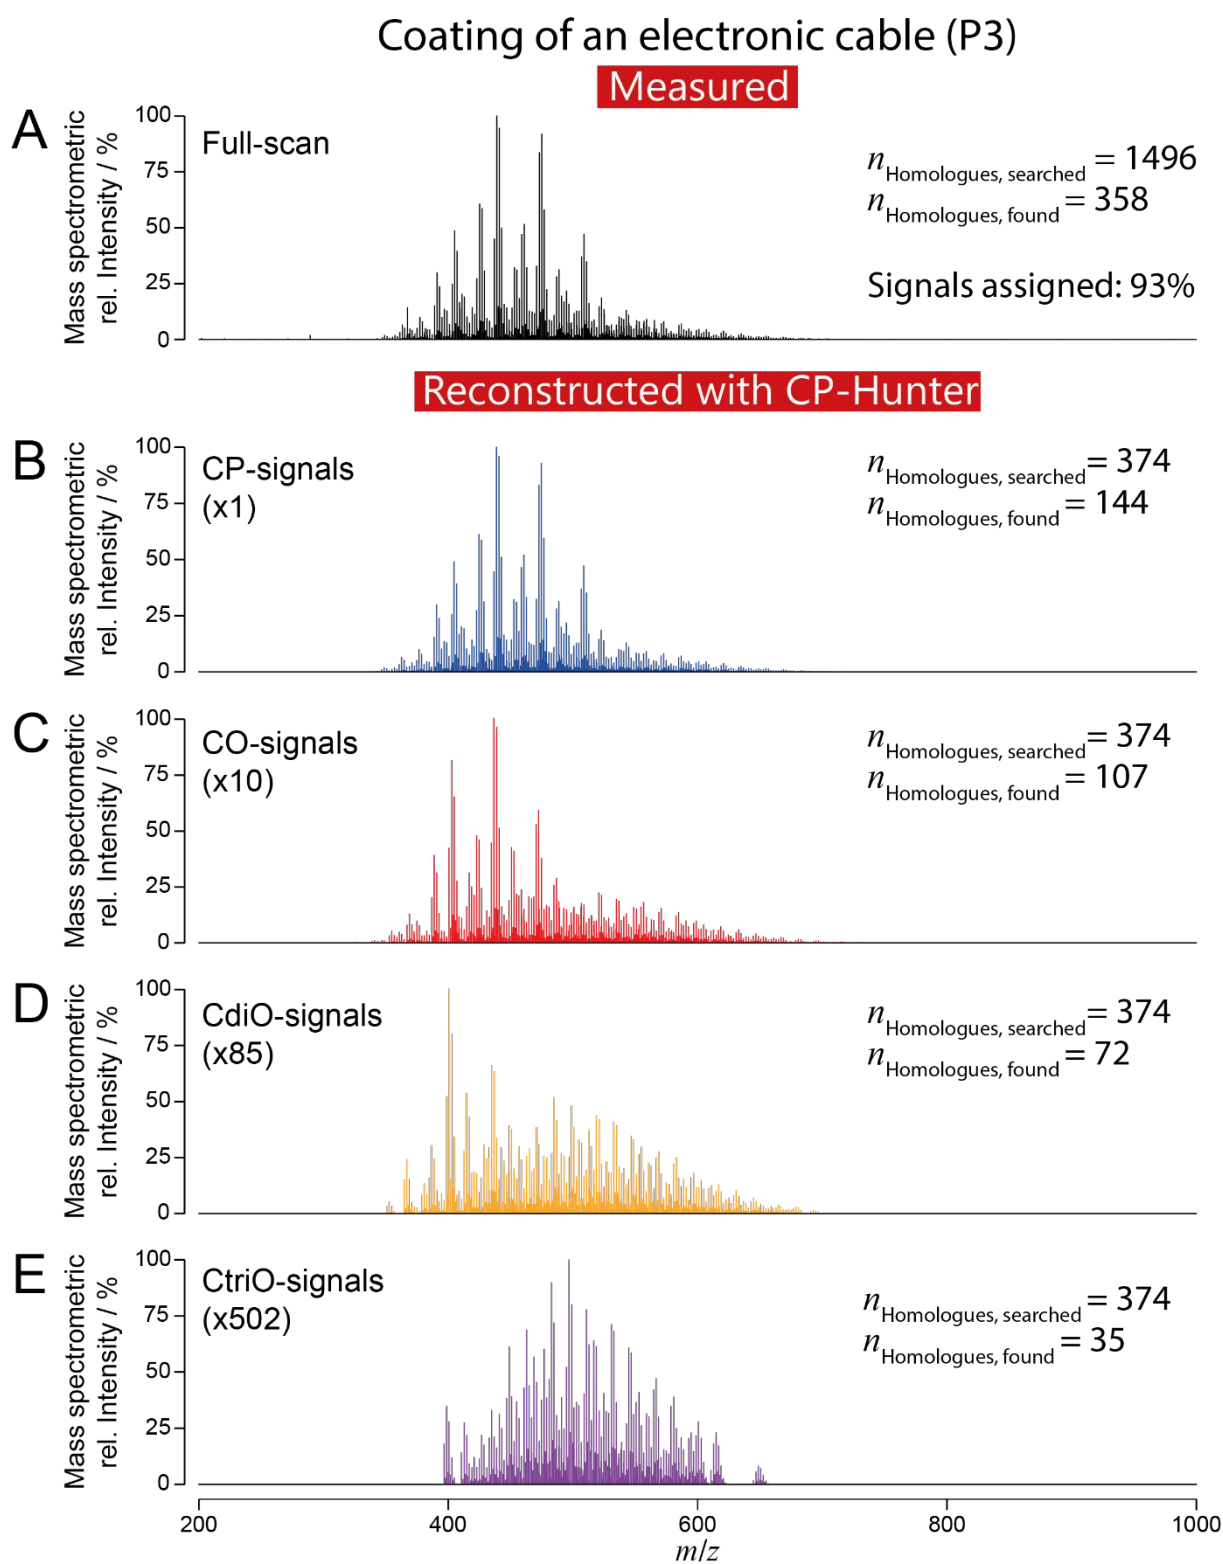

**Figure S9.** Carbon- and chlorine-homologue distributions of CPs (A), COs (B), CdiOs (C) and CtriOs (D) compound classes of P2 and P3. Data were extracted and evaluated by CP-Hunter. Most abundant homologues (MAH, 100%) and proportions per carbon-chain length class are depicted. Respective data are given in Tables S3 and S4.

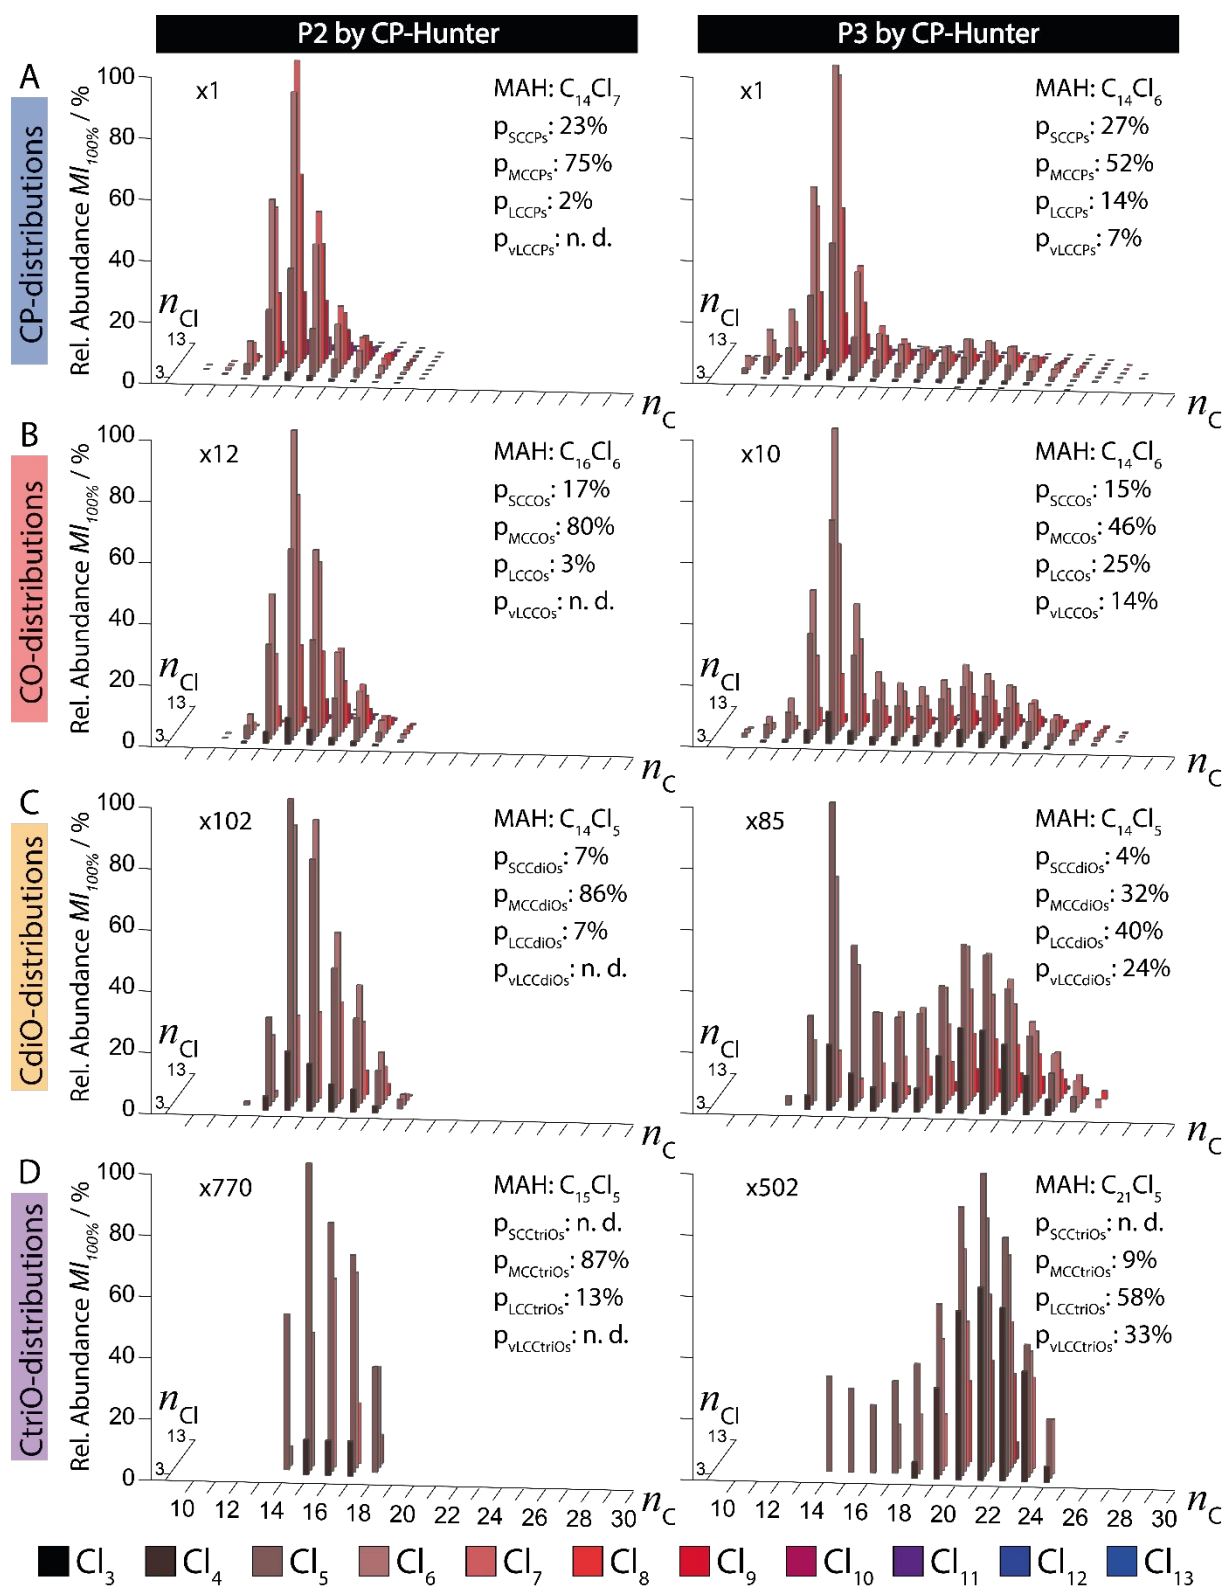

**Figure S10.** Fingerprint of C- and Cl-homologues of CPs, COs, CdiOs and CtriOs compound classes in the sewage sludge (P1). Data were extracted and evaluated by CP-Hunter (top) and RASER (bottom). Plots corresponding to the classification by different carbon-chain length classes (A1 and A2), by saturation degree (B1 and B2), by chlorination degree (C1 and C2), by mean chlorine ( $n_{Cl}$ , D1 and D2) and by mean carbon ( $n_C$ , E1 and E2) numbers are shown. Weighted mean chlorine and carbon numbers (red lines) are indicated. Respective data are given in Tables S6, S7, S9, S10, S13 and S15.

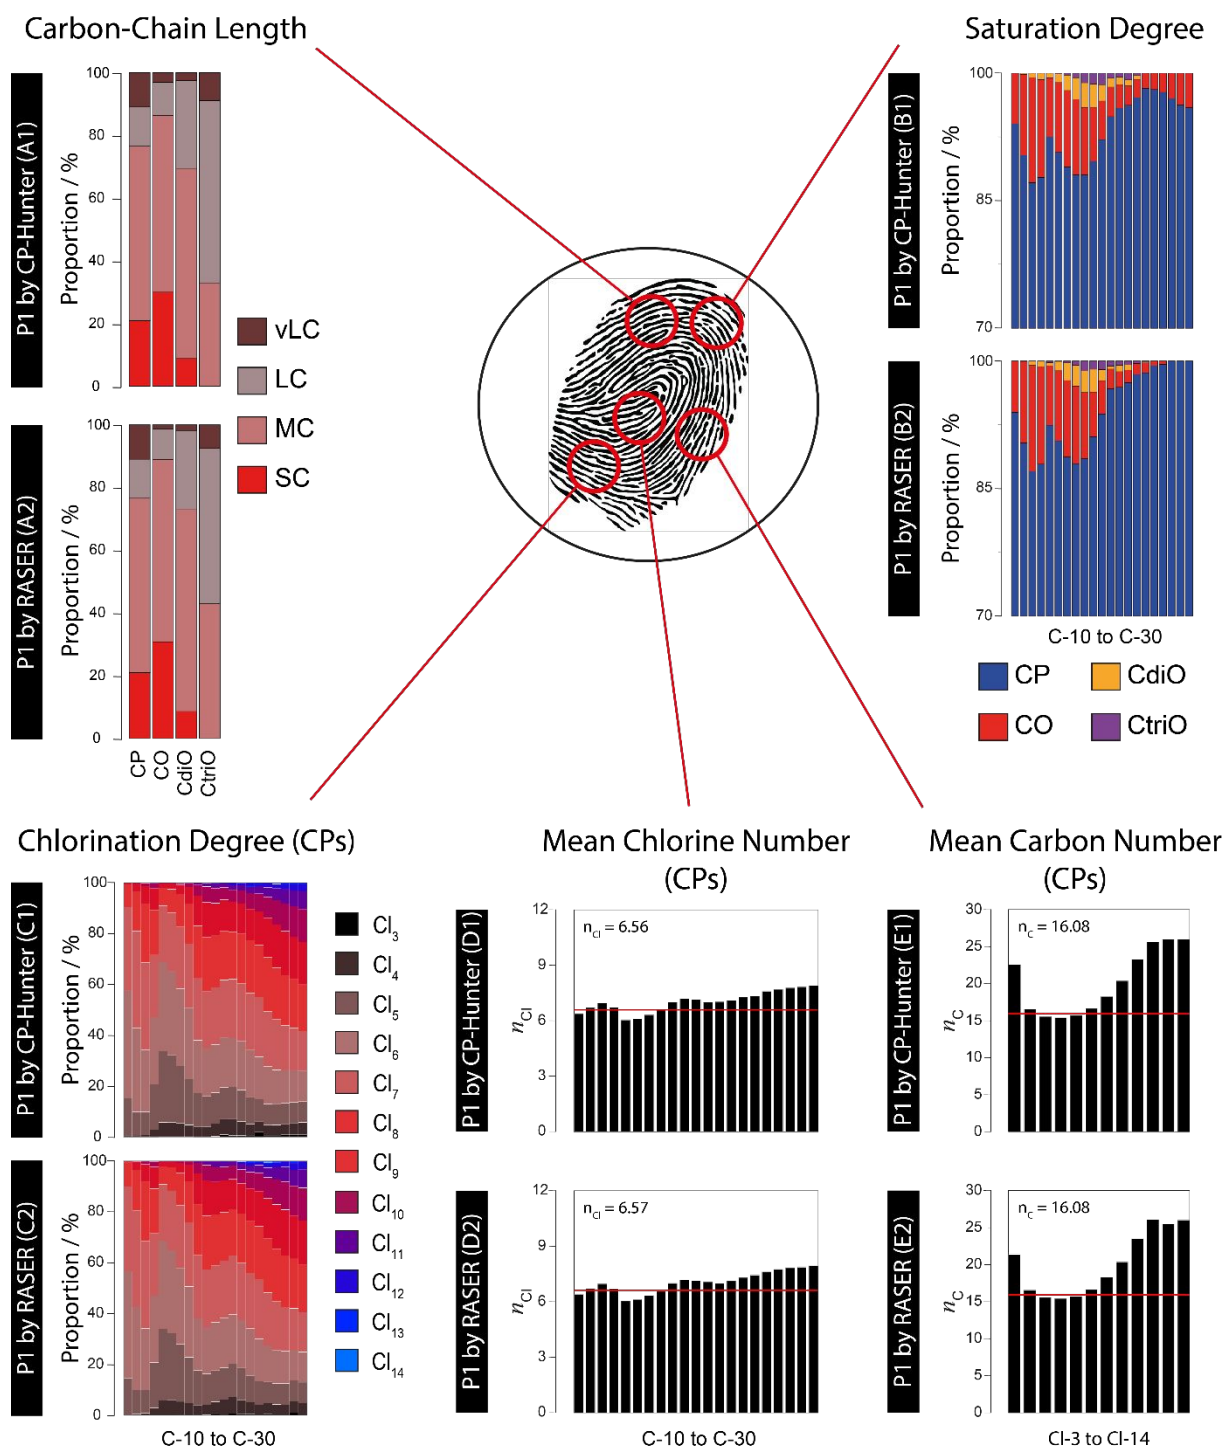

**Figure S11.** Fingerprints of C- and Cl-homologues of CPs, COs, CdiOs and CtriOs compound classes in the yoga mat (P2, top) and coating of an electronic cable (P3, bottom). Data were extracted and evaluated by CP-Hunter. Plots corresponding to the classification by different carbon-chain length classes (A1 and A2), by saturation degree (B1 and B2), by chlorination degree (C1 and C2), by mean chlorine ( $n_{Cl}$ , D1 and D2) and by mean carbon ( $n_C$ , E1 and E2) numbers are shown. Weighted mean chlorine and carbon numbers (red lines) are indicated. Respective data are given in Tables S6, S8, S11, S12, S14, and S16.

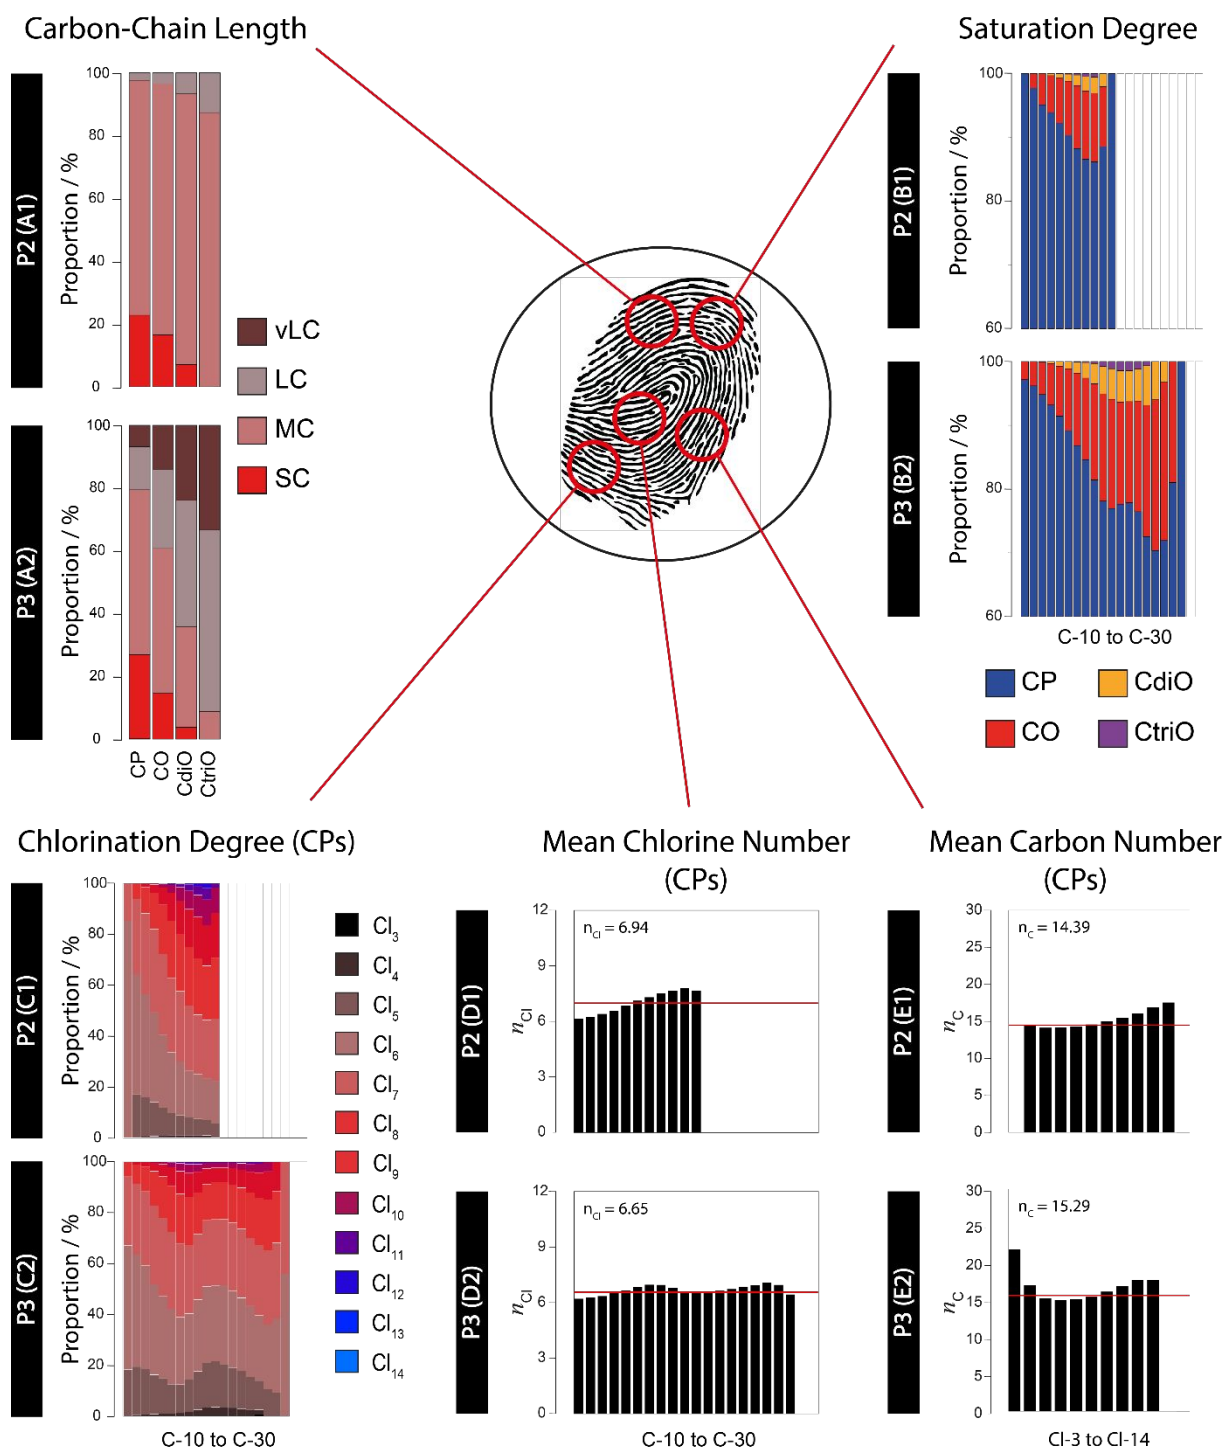



## Supporting tables

**Table S1.** Number of ions and homologues searched for and detected in P1, P2 and P3. Respective mass spectrum of P1 was evaluated by CP-Hunter and RASER, whereas the ones of P2 and P3 were evaluated by CP-Hunter. Proportion of ions assigned from the mass spectrum are indicated.

| <b>Name</b>                    | <b>Code</b> | <b>Evaluated by</b> | <b>Item</b>              | <b>CP</b> | <b>CO</b> | <b>CdiO</b> | <b>CtriO</b> | <b>Total</b> |
|--------------------------------|-------------|---------------------|--------------------------|-----------|-----------|-------------|--------------|--------------|
|                                |             |                     | Ions searched for        | 5126      | 5126      | 5126        | 5126         | 20504        |
|                                |             |                     | Homologues search for    | 374       | 374       | 374         | 374          | 1496         |
| Sewage sludge                  | P1          | CP-Hunter           | Ions found               | 2434      | 1260      | 477         | 257          | 4428         |
|                                |             |                     | Homologues found         | 202       | 111       | 46          | 26           | 385          |
|                                |             |                     | Proportion ions assigned |           |           |             |              | 66%          |
| Sewage sludge                  | P1          | RASER               | Ions found               | 2282      | 792       | 287         | 233          | 3594         |
|                                |             |                     | Homologues found         | 188       | 73        | 29          | 24           | 314          |
|                                |             |                     | Proportion ions assigned |           |           |             |              | -            |
| Yoga mat                       | P2          | CP-Hunter           | Ions found               | 1017      | 659       | 334         | 156          | 2166         |
|                                |             |                     | Homologues found         | 82        | 56        | 31          | 15           | 184          |
|                                |             |                     | Proportion ions assigned |           |           |             |              | 98%          |
| Coating of an electronic cable | P3          | CP-Hunter           | Ions found               | 1718      | 1241      | 809         | 373          | 4141         |
|                                |             |                     | Homologues found         | 144       | 107       | 72          | 35           | 358          |
|                                |             |                     | Proportion ions assigned |           |           |             |              | 93%          |

**Table S2.** Normalized proportions (%) of C- and Cl-homologues of CPs, COs, CdiOs and CtriOs compound classes of P1. Data were extracted and evaluated by CP-Hunter. Abundances are given relative to the intensity (cts) of the most abundant homologue (MAH). Homologues with an  $MI_{100\%}$  below the limit of detection (LOD) of 100 cts were considered undetected (-). Weighted mean carbon- ( $n_C$ ), hydrogen- ( $n_H$ ) and chlorine- ( $n_{Cl}$ ) numbers are provided per class of compound. Mean chlorine ( $n_{Cl}$ ) and carbon ( $n_C$ ) numbers are also presented per carbon-chain length and per chlorination degree, respectively. Proportions of very short- ( $\rho$  vSC-) short- ( $\rho$  SC-), medium- ( $\rho$  MC-), long- ( $\rho$  LC-) and very long-chain ( $\rho$  vLC-) material are depicted.

Normalized homologue-proportion (% relative to the most abundant homologue) Compound class: Chlorinated paraffin (CP)

Sample: Sewage sludge Code: P1

Most Abundant Homologue:  $C_{14}Cl_6$  3.70E+05 cts LOD: 100 cts n (C) 16.08 n (H) 27.61 n (Cl) 6.56

$\rho$  vSC: - %  $\rho$  SC: 20.93 %  $\rho$  MC: 55.58 %  $\rho$  LC: 12.49 %  $\rho$  vLC: 11.01 %

|       | Cl-3  | Cl-4  | Cl-5  | Cl-6  | Cl-7  | Cl-8  | Cl-9  | Cl-10 | Cl-11 | Cl-12 | Cl-13 | Cl-14 | Cl-15 | Cl-16 | Cl-17 | Cl-18 | $n_{Cl}$ |
|-------|-------|-------|-------|-------|-------|-------|-------|-------|-------|-------|-------|-------|-------|-------|-------|-------|----------|
| C-9   | -     | -     | -     | -     | -     | -     | -     | -     | -     | -     | -     | -     | -     | -     | -     | -     | -        |
| C-10  | -     | 0.06  | 1.43  | 4.12  | 3.20  | 0.88  | 0.06  | -     | -     | -     | -     | -     | -     | -     | -     | -     | 6.37     |
| C-11  | -     | 0.45  | 7.98  | 27.99 | 32.24 | 13.15 | 2.69  | 0.30  | -     | -     | -     | -     | -     | -     | -     | -     | 6.69     |
| C-12  | -     | 1.11  | 11.89 | 32.09 | 45.14 | 30.27 | 9.09  | 1.62  | 0.14  | -     | -     | -     | -     | -     | -     | -     | 6.96     |
| C-13  | -     | 3.56  | 21.56 | 31.79 | 29.38 | 21.18 | 10.30 | 2.49  | 0.27  | -     | -     | -     | -     | -     | -     | -     | 6.71     |
| C-14  | 0.08  | 16.60 | 79.98 | 100   | 63.11 | 20.09 | 4.89  | 1.04  | 0.07  | -     | -     | -     | -     | -     | -     | -     | 6.03     |
| C-15  | 0.17  | 17.78 | 80.81 | 99.91 | 70.83 | 28.08 | 6.67  | 1.19  | -     | -     | -     | -     | -     | -     | -     | -     | 6.11     |
| C-16  | 0.14  | 10.48 | 44.15 | 59.21 | 47.60 | 24.74 | 7.61  | 1.50  | 0.15  | -     | -     | -     | -     | -     | -     | -     | 6.31     |
| C-17  | 0.10  | 6.32  | 23.99 | 37.31 | 33.45 | 21.13 | 8.57  | 2.04  | 0.29  | -     | -     | -     | -     | -     | -     | -     | 6.56     |
| C-18  | 0.11  | 4.29  | 14.68 | 22.63 | 27.02 | 22.30 | 13.05 | 4.69  | 0.85  | -     | -     | -     | -     | -     | -     | -     | 7.01     |
| C-19  | 0.08  | 2.07  | 6.16  | 9.60  | 11.59 | 10.84 | 7.10  | 3.14  | 0.75  | 0.05  | -     | -     | -     | -     | -     | -     | 7.18     |
| C-20  | 0.08  | 1.28  | 3.13  | 4.86  | 5.75  | 5.24  | 3.28  | 1.51  | 0.50  | 0.07  | -     | -     | -     | -     | -     | -     | 7.13     |
| C-21  | 0.20  | 1.21  | 2.50  | 3.92  | 4.51  | 3.86  | 2.47  | 0.95  | 0.30  | 0.07  | -     | -     | -     | -     | -     | -     | 6.99     |
| C-22  | 0.15  | 1.48  | 2.91  | 4.39  | 5.30  | 4.23  | 2.71  | 1.07  | 0.42  | 0.24  | -     | -     | -     | -     | -     | -     | 7.02     |
| C-23  | 0.17  | 1.45  | 3.27  | 5.04  | 6.00  | 5.17  | 3.11  | 1.33  | 0.56  | 0.19  | 0.06  | -     | -     | -     | -     | -     | 7.09     |
| C-24  | 0.18  | 1.32  | 3.07  | 5.42  | 6.56  | 6.06  | 3.58  | 1.80  | 0.74  | 0.28  | 0.20  | -     | -     | -     | -     | -     | 7.27     |
| C-25  | 0.55  | 1.13  | 2.46  | 4.60  | 6.51  | 5.64  | 3.67  | 1.92  | 0.80  | 0.31  | 0.09  | -     | -     | -     | -     | -     | 7.32     |
| C-26  | 0.15  | 1.02  | 2.03  | 3.61  | 5.30  | 5.22  | 3.77  | 2.03  | 0.91  | 0.36  | 0.11  | 0.11  | -     | -     | -     | -     | 7.58     |
| C-27  | 0.11  | 0.81  | 1.58  | 2.55  | 3.79  | 3.88  | 3.23  | 1.86  | 0.88  | 0.33  | 0.10  | -     | -     | -     | -     | -     | 7.68     |
| C-28  | 0.14  | 0.60  | 1.20  | 1.88  | 2.56  | 2.87  | 2.51  | 1.58  | 0.81  | 0.30  | 0.08  | -     | -     | -     | -     | -     | 7.77     |
| C-29  | 0.11  | 0.47  | 0.86  | 1.34  | 1.75  | 2.03  | 1.77  | 1.27  | 0.65  | 0.26  | 0.07  | -     | -     | -     | -     | -     | 7.83     |
| C-30  | 0.08  | 0.35  | 0.60  | 0.89  | 1.13  | 1.33  | 1.22  | 0.94  | 0.51  | 0.20  | 0.05  | -     | -     | -     | -     | -     | 7.89     |
| $n_C$ | 22.53 | 16.55 | 15.54 | 15.41 | 15.69 | 16.63 | 18.24 | 20.37 | 23.28 | 25.61 | 26.00 | 26.00 | -     | -     | -     | -     | -        |

Normalized homologue-proportion (% relative to the most abundant homologue) Compound class: Chlorinated olefin (CO)

Sample: Sewage sludge Code: P1

Most Abundant Homologue:  $C_{15}Cl_5$  3.61E+04 cts LOD: 100 cts n (C) 15.01 n (H) 23.95 n (Cl) 6.06

$\rho$  vSC: - %  $\rho$  SC: 30.05 %  $\rho$  MC: 56.27 %  $\rho$  LC: 10.62 %  $\rho$  vLC: 3.07 %

|       | Cl-3 | Cl-4  | Cl-5   | Cl-6  | Cl-7  | Cl-8  | Cl-9  | Cl-10 | Cl-11 | Cl-12 | Cl-13 | Cl-14 | Cl-15 | Cl-16 | Cl-17 | Cl-18 | $n_{Cl}$ |
|-------|------|-------|--------|-------|-------|-------|-------|-------|-------|-------|-------|-------|-------|-------|-------|-------|----------|
| C-9   | -    | -     | -      | -     | -     | -     | -     | -     | -     | -     | -     | -     | -     | -     | -     | -     | -        |
| C-10  | -    | -     | 2.09   | 3.28  | 0.93  | -     | -     | -     | -     | -     | -     | -     | -     | -     | -     | -     | 5.82     |
| C-11  | -    | 0.68  | 16.63  | 43.33 | 25.47 | 5.48  | -     | -     | -     | -     | -     | -     | -     | -     | -     | -     | 6.20     |
| C-12  | -    | 1.30  | 23.15  | 77.59 | 64.27 | 22.30 | 2.68  | -     | -     | -     | -     | -     | -     | -     | -     | -     | 6.48     |
| C-13  | -    | 3.40  | 20.98  | 49.51 | 56.44 | 26.52 | 5.11  | -     | -     | -     | -     | -     | -     | -     | -     | -     | 6.60     |
| C-14  | -    | 19.87 | 76.85  | 74.59 | 37.90 | 9.62  | 0.94  | -     | -     | -     | -     | -     | -     | -     | -     | -     | 5.74     |
| C-15  | -    | 27.10 | 100.00 | 97.24 | 47.57 | 10.51 | 1.21  | -     | -     | -     | -     | -     | -     | -     | -     | -     | 5.71     |
| C-16  | -    | 18.54 | 63.56  | 69.93 | 37.60 | 12.13 | 1.63  | -     | -     | -     | -     | -     | -     | -     | -     | -     | 5.83     |
| C-17  | -    | 12.88 | 37.27  | 46.50 | 29.06 | 10.42 | 1.96  | -     | -     | -     | -     | -     | -     | -     | -     | -     | 5.95     |
| C-18  | -    | 7.78  | 21.93  | 29.33 | 25.23 | 13.18 | 3.99  | -     | -     | -     | -     | -     | -     | -     | -     | -     | 6.26     |
| C-19  | -    | 2.97  | 7.88   | 9.80  | 9.81  | 5.59  | 1.33  | -     | -     | -     | -     | -     | -     | -     | -     | -     | 6.30     |
| C-20  | -    | 1.25  | 2.86   | 3.56  | 3.10  | 1.76  | 0.51  | -     | -     | -     | -     | -     | -     | -     | -     | -     | 6.21     |
| C-21  | -    | 0.92  | 1.66   | 2.22  | 1.77  | 0.95  | -     | -     | -     | -     | -     | -     | -     | -     | -     | -     | 6.02     |
| C-22  | -    | 0.92  | 1.44   | 2.09  | 1.77  | 0.60  | -     | -     | -     | -     | -     | -     | -     | -     | -     | -     | 5.95     |
| C-23  | -    | 0.66  | 1.41   | 1.95  | 1.68  | 0.66  | -     | -     | -     | -     | -     | -     | -     | -     | -     | -     | 6.04     |
| C-24  | -    | 0.66  | 1.28   | 2.22  | 1.59  | 0.84  | -     | -     | -     | -     | -     | -     | -     | -     | -     | -     | 6.10     |
| C-25  | -    | 0.43  | 1.08   | 1.69  | 1.36  | 0.50  | -     | -     | -     | -     | -     | -     | -     | -     | -     | -     | 6.08     |
| C-26  | -    | -     | 0.91   | 1.51  | 1.53  | 0.46  | 0.47  | -     | -     | -     | -     | -     | -     | -     | -     | -     | 6.60     |
| C-27  | -    | -     | 0.78   | 1.13  | 1.41  | 0.44  | 0.70  | -     | -     | -     | -     | -     | -     | -     | -     | -     | 6.81     |
| C-28  | -    | -     | 0.55   | 1.10  | 1.14  | 0.92  | 0.84  | -     | -     | -     | -     | -     | -     | -     | -     | -     | 7.09     |
| C-29  | -    | -     | 0.36   | 0.84  | 1.05  | 1.18  | 0.76  | -     | -     | -     | -     | -     | -     | -     | -     | -     | 7.27     |
| C-30  | -    | -     | -      | 0.54  | 0.86  | 0.85  | 0.89  | -     | -     | -     | -     | -     | -     | -     | -     | -     | 7.67     |
| $n_C$ | -    | 15.81 | 15.18  | 14.72 | 14.76 | 15.25 | 17.38 | -     | -     | -     | -     | -     | -     | -     | -     | -     | -        |

Normalized homologue-proportion (% , relative to the most abundant homologue)

Compound class: Chlorinated diolefin (CdiO)

Sample: Sewage sludge

Code: P1

Most Abundant Homologue: C<sub>16</sub>Cl<sub>5</sub> 7.05E+03 cts LOD: 100 cts n (C) 16.44 n (H) 25.56 n (Cl) 5.32  
 p vSC - % p SC 8.90 % p MC 60.61 % p LC 27.95 % p vLC 2.54 %

|                | CI-3  | CI-4  | CI-5  | CI-6  | CI-7  | CI-8  | CI-9  | CI-10 | CI-11 | CI-12 | CI-13 | CI-14 | CI-15 | CI-16 | CI-17 | CI-18 | n <sub>Cl</sub> |
|----------------|-------|-------|-------|-------|-------|-------|-------|-------|-------|-------|-------|-------|-------|-------|-------|-------|-----------------|
| C-9            | -     | -     | -     | -     | -     | -     | -     | -     | -     | -     | -     | -     | -     | -     | -     | -     | -               |
| C-10           | -     | -     | -     | -     | -     | -     | -     | -     | -     | -     | -     | -     | -     | -     | -     | -     | -               |
| C-11           | -     | -     | 2.66  | 3.77  | -     | -     | -     | -     | -     | -     | -     | -     | -     | -     | -     | -     | 5.59            |
| C-12           | -     | -     | 14.92 | 20.68 | 2.28  | -     | -     | -     | -     | -     | -     | -     | -     | -     | -     | -     | 5.67            |
| C-13           | -     | -     | 17.56 | 28.25 | 8.29  | -     | -     | -     | -     | -     | -     | -     | -     | -     | -     | -     | 5.83            |
| C-14           | -     | 15.66 | 46.22 | 24.44 | -     | -     | -     | -     | -     | -     | -     | -     | -     | -     | -     | -     | 5.10            |
| C-15           | -     | 35.05 | 96.35 | 45.06 | -     | -     | -     | -     | -     | -     | -     | -     | -     | -     | -     | -     | 5.06            |
| C-16           | -     | 39.98 | 100   | 61.23 | 5.19  | -     | -     | -     | -     | -     | -     | -     | -     | -     | -     | -     | 5.15            |
| C-17           | -     | 34.70 | 87.25 | 65.58 | 13.37 | -     | -     | -     | -     | -     | -     | -     | -     | -     | -     | -     | 5.29            |
| C-18           | -     | 6.22  | 77.08 | 74.36 | 30.09 | -     | -     | -     | -     | -     | -     | -     | -     | -     | -     | -     | 5.68            |
| C-19           | -     | 12.75 | 30.49 | 27.44 | 11.40 | -     | -     | -     | -     | -     | -     | -     | -     | -     | -     | -     | 5.46            |
| C-20           | -     | 5.16  | 11.30 | 8.81  | 2.37  | -     | -     | -     | -     | -     | -     | -     | -     | -     | -     | -     | 5.30            |
| C-21           | -     | 3.34  | 4.07  | 4.14  | -     | -     | -     | -     | -     | -     | -     | -     | -     | -     | -     | -     | 5.07            |
| C-22           | -     | 2.69  | 4.91  | 3.07  | -     | -     | -     | -     | -     | -     | -     | -     | -     | -     | -     | -     | 5.04            |
| C-23           | -     | 3.41  | 4.38  | 2.50  | -     | -     | -     | -     | -     | -     | -     | -     | -     | -     | -     | -     | 4.91            |
| C-24           | -     | 2.42  | 2.99  | 1.71  | -     | -     | -     | -     | -     | -     | -     | -     | -     | -     | -     | -     | 4.90            |
| C-25           | -     | -     | -     | -     | -     | -     | -     | -     | -     | -     | -     | -     | -     | -     | -     | -     | -               |
| C-26           | -     | -     | -     | -     | -     | -     | -     | -     | -     | -     | -     | -     | -     | -     | -     | -     | -               |
| C-27           | -     | -     | -     | -     | -     | -     | -     | -     | -     | -     | -     | -     | -     | -     | -     | -     | -               |
| C-28           | -     | -     | -     | -     | -     | -     | -     | -     | -     | -     | -     | -     | -     | -     | -     | -     | -               |
| C-29           | -     | -     | -     | -     | -     | -     | -     | -     | -     | -     | -     | -     | -     | -     | -     | -     | -               |
| C-30           | -     | -     | -     | -     | -     | -     | -     | -     | -     | -     | -     | -     | -     | -     | -     | -     | -               |
| n <sub>c</sub> | CI-35 | CI-36 | CI-37 | CI-38 | CI-39 | CI-40 | CI-41 | CI-42 | CI-43 | CI-44 | CI-45 | CI-46 | CI-47 | CI-48 | CI-49 | CI-50 |                 |
|                | -     | 16.72 | 16.34 | 16.33 | 17.14 | -     | -     | -     | -     | -     | -     | -     | -     | -     | -     | -     |                 |

Normalized homologue-proportion (% , relative to the most abundant homologue)

Compound class: Chlorinated triolefin (CtriO)

Sample: Sewage sludge

Code: P1

Most Abundant Homologue: C<sub>18</sub>Cl<sub>5</sub> 2.57E+03 cts LOD: 100 cts n (C) 18.31 n (H) 27.72 n (Cl) 4.90  
 p vSC - % p SC - % p MC 33.00 % p LC 58.16 % p vLC 8.84 %

|                | CI-3  | CI-4  | CI-5  | CI-6  | CI-7  | CI-8  | CI-9  | CI-10 | CI-11 | CI-12 | CI-13 | CI-14 | CI-15 | CI-16 | CI-17 | CI-18 | n <sub>Cl</sub> |
|----------------|-------|-------|-------|-------|-------|-------|-------|-------|-------|-------|-------|-------|-------|-------|-------|-------|-----------------|
| C-9            | -     | -     | -     | -     | -     | -     | -     | -     | -     | -     | -     | -     | -     | -     | -     | -     | -               |
| C-10           | -     | -     | -     | -     | -     | -     | -     | -     | -     | -     | -     | -     | -     | -     | -     | -     | -               |
| C-11           | -     | -     | -     | -     | -     | -     | -     | -     | -     | -     | -     | -     | -     | -     | -     | -     | -               |
| C-12           | -     | -     | -     | -     | -     | -     | -     | -     | -     | -     | -     | -     | -     | -     | -     | -     | -               |
| C-13           | -     | -     | -     | -     | -     | -     | -     | -     | -     | -     | -     | -     | -     | -     | -     | -     | -               |
| C-14           | -     | -     | -     | -     | -     | -     | -     | -     | -     | -     | -     | -     | -     | -     | -     | -     | -               |
| C-15           | -     | 14.34 | 18.95 | -     | -     | -     | -     | -     | -     | -     | -     | -     | -     | -     | -     | -     | 4.57            |
| C-16           | -     | 24.73 | 40.39 | -     | -     | -     | -     | -     | -     | -     | -     | -     | -     | -     | -     | -     | 4.62            |
| C-17           | -     | 37.03 | 61.37 | 16.92 | -     | -     | -     | -     | -     | -     | -     | -     | -     | -     | -     | -     | 4.83            |
| C-18           | -     | 50.81 | 100   | 51.36 | -     | -     | -     | -     | -     | -     | -     | -     | -     | -     | -     | -     | 5.00            |
| C-19           | -     | 25.56 | 49.94 | 28.01 | -     | -     | -     | -     | -     | -     | -     | -     | -     | -     | -     | -     | 5.02            |
| C-20           | -     | 10.45 | 30.01 | 8.07  | 5.60  | -     | -     | -     | -     | -     | -     | -     | -     | -     | -     | -     | 5.16            |
| C-21           | -     | 8.29  | 8.64  | -     | -     | -     | -     | -     | -     | -     | -     | -     | -     | -     | -     | -     | 4.51            |
| C-22           | -     | 8.40  | 7.32  | -     | -     | -     | -     | -     | -     | -     | -     | -     | -     | -     | -     | -     | 4.47            |
| C-23           | -     | 8.30  | 7.81  | 13.86 | -     | -     | -     | -     | -     | -     | -     | -     | -     | -     | -     | -     | 5.19            |
| C-24           | -     | 6.32  | 5.27  | -     | -     | -     | -     | -     | -     | -     | -     | -     | -     | -     | -     | -     | 4.45            |
| C-25           | -     | -     | -     | -     | -     | -     | -     | -     | -     | -     | -     | -     | -     | -     | -     | -     | -               |
| C-26           | -     | -     | -     | -     | -     | -     | -     | -     | -     | -     | -     | -     | -     | -     | -     | -     | -               |
| C-27           | -     | -     | -     | -     | -     | -     | -     | -     | -     | -     | -     | -     | -     | -     | -     | -     | -               |
| C-28           | -     | -     | -     | -     | -     | -     | -     | -     | -     | -     | -     | -     | -     | -     | -     | -     | -               |
| C-29           | -     | -     | -     | -     | -     | -     | -     | -     | -     | -     | -     | -     | -     | -     | -     | -     | -               |
| C-30           | -     | -     | -     | -     | -     | -     | -     | -     | -     | -     | -     | -     | -     | -     | -     | -     | -               |
| n <sub>c</sub> | CI-51 | CI-52 | CI-53 | CI-54 | CI-55 | CI-56 | CI-57 | CI-58 | CI-59 | CI-60 | CI-61 | CI-62 | CI-63 | CI-64 | CI-65 | CI-66 |                 |
|                | -     | 18.28 | 18.11 | 18.82 | 20.00 | -     | -     | -     | -     | -     | -     | -     | -     | -     | -     | -     |                 |

**Table S3.** Normalized proportions (%) of C- and Cl-homologues of CPs, COs, CdiOs and CtriOs compound classes of P2. Data were evaluated by CP-Hunter. Abundances are given relative to the intensity (cts) of the most abundant homologue (MAH). Homologues with an  $MI_{100\%}$  below the limit of detection (LOD) of 100 cts were considered undetected (-). Weighted mean carbon- ( $n_C$ ), hydrogen- ( $n_H$ ) and chlorine- ( $n_{Cl}$ ) numbers are provided per class of compound. Mean chlorine ( $n_{Cl}$ ) and carbon ( $n_C$ ) numbers are also presented per carbon-chain length and per chlorination degree, respectively. Proportions of very short- ( $\rho$  vSC-) short- ( $\rho$  SC-), medium- ( $\rho$  MC-), long- ( $\rho$  LC-) and very long-chain ( $\rho$  vLC-) material are depicted.

Normalized homologue-proportion (% relative to the most abundant homologue) Compound class: Chlorinated paraffin (CP)

Sample: Yoga mat Code: P2

Most Abundant Homologue:  $C_{14}Cl_7$  7.29E+06 cts LOD: 100 cts n (C) 14.39 n (H) 23.84 n (Cl) 6.94

$\rho$  vSC: - %  $\rho$  SC: 22.78 %  $\rho$  MC: 74.82 %  $\rho$  LC: 2.40 %  $\rho$  vLC: - %

|       | Cl-3 | Cl-4  | Cl-5  | Cl-6  | Cl-7  | Cl-8  | Cl-9  | Cl-10 | Cl-11 | Cl-12 | Cl-13 | Cl-14 | Cl-15 | Cl-16 | Cl-17 | Cl-18 | $n_{Cl}$ |
|-------|------|-------|-------|-------|-------|-------|-------|-------|-------|-------|-------|-------|-------|-------|-------|-------|----------|
| C-9   | -    | -     | -     | -     | -     | -     | -     | -     | -     | -     | -     | -     | -     | -     | -     | -     | -        |
| C-10  | -    | -     | -     | 0.06  | 0.01  | -     | -     | -     | -     | -     | -     | -     | -     | -     | -     | -     | 6.15     |
| C-11  | -    | -     | 0.24  | 0.66  | 0.41  | 0.09  | -     | -     | -     | -     | -     | -     | -     | -     | -     | -     | 6.25     |
| C-12  | -    | 0.12  | 3.66  | 9.57  | 7.50  | 2.42  | 0.36  | -     | -     | -     | -     | -     | -     | -     | -     | -     | 6.40     |
| C-13  | -    | 1.13  | 21.32 | 56.00 | 52.06 | 22.57 | 5.30  | 0.75  | -     | -     | -     | -     | -     | -     | -     | -     | 6.58     |
| C-14  | -    | 2.58  | 35.00 | 91.17 | 100   | 61.47 | 21.72 | 4.54  | 0.57  | 0.01  | -     | -     | -     | -     | -     | -     | 6.85     |
| C-15  | -    | 1.59  | 15.48 | 41.64 | 50.89 | 38.90 | 19.10 | 5.54  | 0.99  | 0.10  | -     | -     | -     | -     | -     | -     | 7.12     |
| C-16  | -    | 0.69  | 5.81  | 15.59 | 20.28 | 16.50 | 9.61  | 3.91  | 0.99  | 0.13  | -     | -     | -     | -     | -     | -     | 7.31     |
| C-17  | -    | 0.39  | 2.89  | 7.38  | 10.22 | 9.28  | 5.99  | 2.87  | 0.98  | 0.21  | 0.01  | -     | -     | -     | -     | -     | 7.51     |
| C-18  | -    | 0.15  | 1.00  | 2.69  | 3.56  | 3.39  | 2.47  | 1.32  | 0.53  | 0.16  | 0.01  | -     | -     | -     | -     | -     | 7.67     |
| C-19  | -    | 0.04  | 0.22  | 0.60  | 0.84  | 0.78  | 0.59  | 0.37  | 0.16  | 0.07  | -     | -     | -     | -     | -     | -     | 7.79     |
| C-20  | -    | -     | 0.03  | 0.09  | 0.13  | 0.13  | 0.09  | 0.05  | 0.01  | -     | -     | -     | -     | -     | -     | -     | 7.68     |
| C-21  | -    | -     | -     | -     | -     | -     | -     | -     | -     | -     | -     | -     | -     | -     | -     | -     | -        |
| C-22  | -    | -     | -     | -     | -     | -     | -     | -     | -     | -     | -     | -     | -     | -     | -     | -     | -        |
| C-23  | -    | -     | -     | -     | -     | -     | -     | -     | -     | -     | -     | -     | -     | -     | -     | -     | -        |
| C-24  | -    | -     | -     | -     | -     | -     | -     | -     | -     | -     | -     | -     | -     | -     | -     | -     | -        |
| C-25  | -    | -     | -     | -     | -     | -     | -     | -     | -     | -     | -     | -     | -     | -     | -     | -     | -        |
| C-26  | -    | -     | -     | -     | -     | -     | -     | -     | -     | -     | -     | -     | -     | -     | -     | -     | -        |
| C-27  | -    | -     | -     | -     | -     | -     | -     | -     | -     | -     | -     | -     | -     | -     | -     | -     | -        |
| C-28  | -    | -     | -     | -     | -     | -     | -     | -     | -     | -     | -     | -     | -     | -     | -     | -     | -        |
| C-29  | -    | -     | -     | -     | -     | -     | -     | -     | -     | -     | -     | -     | -     | -     | -     | -     | -        |
| C-30  | -    | -     | -     | -     | -     | -     | -     | -     | -     | -     | -     | -     | -     | -     | -     | -     | -        |
| $n_C$ | -    | 14.53 | 14.14 | 14.14 | 14.30 | 14.58 | 14.98 | 15.48 | 16.11 | 16.91 | 17.53 | -     | -     | -     | -     | -     | -        |

Normalized homologue-proportion (% relative to the most abundant homologue) Compound class: Chlorinated olefin (CO)

Sample: Yoga mat Code: P2

Most Abundant Homologue:  $C_{14}Cl_6$  6.33E+05 cts LOD: 100 cts n (C) 14.67 n (H) 22.96 n (Cl) 6.38

$\rho$  vSC: - %  $\rho$  SC: 16.47 %  $\rho$  MC: 80.11 %  $\rho$  LC: 3.41 %  $\rho$  vLC: - %

|       | Cl-3 | Cl-4  | Cl-5  | Cl-6  | Cl-7  | Cl-8  | Cl-9  | Cl-10 | Cl-11 | Cl-12 | Cl-13 | Cl-14 | Cl-15 | Cl-16 | Cl-17 | Cl-18 | $n_{Cl}$ |
|-------|------|-------|-------|-------|-------|-------|-------|-------|-------|-------|-------|-------|-------|-------|-------|-------|----------|
| C-9   | -    | -     | -     | -     | -     | -     | -     | -     | -     | -     | -     | -     | -     | -     | -     | -     | -        |
| C-10  | -    | -     | -     | -     | -     | -     | -     | -     | -     | -     | -     | -     | -     | -     | -     | -     | -        |
| C-11  | -    | -     | 0.12  | 0.25  | -     | -     | -     | -     | -     | -     | -     | -     | -     | -     | -     | -     | 5.67     |
| C-12  | -    | 0.43  | 4.36  | 6.53  | 2.42  | 0.18  | -     | -     | -     | -     | -     | -     | -     | -     | -     | -     | 5.82     |
| C-13  | -    | 3.74  | 31.15 | 46.07 | 25.18 | 6.54  | 0.33  | -     | -     | -     | -     | -     | -     | -     | -     | -     | 6.01     |
| C-14  | -    | 8.51  | 62.33 | 100   | 77.32 | 26.71 | 4.82  | 0.23  | -     | -     | -     | -     | -     | -     | -     | -     | 6.24     |
| C-15  | -    | 4.90  | 32.88 | 60.89 | 55.44 | 24.74 | 7.66  | 1.00  | -     | -     | -     | -     | -     | -     | -     | -     | 6.48     |
| C-16  | -    | 2.37  | 13.90 | 27.65 | 27.40 | 15.35 | 6.31  | 1.37  | 0.02  | 0.26  | -     | -     | -     | -     | -     | -     | 6.69     |
| C-17  | -    | 1.46  | 7.79  | 15.00 | 15.63 | 10.58 | 4.87  | 1.34  | 0.32  | -     | -     | -     | -     | -     | -     | -     | 6.84     |
| C-18  | -    | 0.57  | 2.95  | 5.58  | 5.72  | 4.28  | 2.15  | 0.65  | -     | -     | -     | -     | -     | -     | -     | -     | 6.88     |
| C-19  | -    | -     | 0.62  | 1.19  | 1.28  | 0.94  | 0.44  | -     | -     | -     | -     | -     | -     | -     | -     | -     | 6.86     |
| C-20  | -    | -     | -     | -     | -     | -     | -     | -     | -     | -     | -     | -     | -     | -     | -     | -     | -        |
| C-21  | -    | -     | -     | -     | -     | -     | -     | -     | -     | -     | -     | -     | -     | -     | -     | -     | -        |
| C-22  | -    | -     | -     | -     | -     | -     | -     | -     | -     | -     | -     | -     | -     | -     | -     | -     | -        |
| C-23  | -    | -     | -     | -     | -     | -     | -     | -     | -     | -     | -     | -     | -     | -     | -     | -     | -        |
| C-24  | -    | -     | -     | -     | -     | -     | -     | -     | -     | -     | -     | -     | -     | -     | -     | -     | -        |
| C-25  | -    | -     | -     | -     | -     | -     | -     | -     | -     | -     | -     | -     | -     | -     | -     | -     | -        |
| C-26  | -    | -     | -     | -     | -     | -     | -     | -     | -     | -     | -     | -     | -     | -     | -     | -     | -        |
| C-27  | -    | -     | -     | -     | -     | -     | -     | -     | -     | -     | -     | -     | -     | -     | -     | -     | -        |
| C-28  | -    | -     | -     | -     | -     | -     | -     | -     | -     | -     | -     | -     | -     | -     | -     | -     | -        |
| C-29  | -    | -     | -     | -     | -     | -     | -     | -     | -     | -     | -     | -     | -     | -     | -     | -     | -        |
| C-30  | -    | -     | -     | -     | -     | -     | -     | -     | -     | -     | -     | -     | -     | -     | -     | -     | -        |
| $n_C$ | -    | 14.53 | 14.38 | 14.49 | 14.74 | 15.14 | 15.71 | 16.25 | 16.93 | 16.00 | -     | -     | -     | -     | -     | -     | -        |

Normalized homologue-proportion (% relative to the most abundant homologue)

Compound class: Chlorinated diolefin (CdiO)

Sample: Yoga mat

Code: P2

Most Abundant Homologue: C<sub>14</sub>Cl<sub>5</sub> 7.12E+04 cts LOD: 100 cts n (C) 15.21 n (H) 22.76 n (Cl) 5.67  
 p vSC - % p SC 7.15 % p MC 86.18 % p LC 6.68 % p vLC - %

|                | Cl-3  | Cl-4  | Cl-5  | Cl-6  | Cl-7  | Cl-8  | Cl-9  | Cl-10 | Cl-11 | Cl-12 | Cl-13 | Cl-14 | Cl-15 | Cl-16 | Cl-17 | Cl-18 | n <sub>Cl</sub> |
|----------------|-------|-------|-------|-------|-------|-------|-------|-------|-------|-------|-------|-------|-------|-------|-------|-------|-----------------|
| C-9            | -     | -     | -     | -     | -     | -     | -     | -     | -     | -     | -     | -     | -     | -     | -     | -     | -               |
| C-10           | -     | -     | -     | -     | -     | -     | -     | -     | -     | -     | -     | -     | -     | -     | -     | -     | -               |
| C-11           | -     | -     | -     | -     | -     | -     | -     | -     | -     | -     | -     | -     | -     | -     | -     | -     | -               |
| C-12           | -     | -     | 1.16  | -     | -     | -     | -     | -     | -     | -     | -     | -     | -     | -     | -     | -     | 5.00            |
| C-13           | -     | 4.52  | 28.77 | 21.67 | 2.00  | -     | -     | -     | -     | -     | -     | -     | -     | -     | -     | -     | 5.37            |
| C-14           | -     | 19.30 | 100   | 90.25 | 26.59 | -     | -     | -     | -     | -     | -     | -     | -     | -     | -     | -     | 5.53            |
| C-15           | -     | 15.33 | 80.70 | 91.94 | 27.90 | -     | -     | -     | -     | -     | -     | -     | -     | -     | -     | -     | 5.61            |
| C-16           | -     | 8.87  | 45.33 | 55.51 | 31.38 | -     | -     | -     | -     | -     | -     | -     | -     | -     | -     | -     | 5.78            |
| C-17           | -     | 7.38  | 29.06 | 38.43 | 25.20 | 7.75  | -     | -     | -     | -     | -     | -     | -     | -     | -     | -     | 5.97            |
| C-18           | -     | 2.12  | 12.35 | 16.87 | 10.69 | 3.59  | -     | -     | -     | -     | -     | -     | -     | -     | -     | -     | 6.03            |
| C-19           | -     | -     | 3.07  | 3.29  | 2.02  | 0.30  | -     | -     | -     | -     | -     | -     | -     | -     | -     | -     | 5.95            |
| C-20           | -     | -     | -     | -     | -     | -     | -     | -     | -     | -     | -     | -     | -     | -     | -     | -     | -               |
| C-21           | -     | -     | -     | -     | -     | -     | -     | -     | -     | -     | -     | -     | -     | -     | -     | -     | -               |
| C-22           | -     | -     | -     | -     | -     | -     | -     | -     | -     | -     | -     | -     | -     | -     | -     | -     | -               |
| C-23           | -     | -     | -     | -     | -     | -     | -     | -     | -     | -     | -     | -     | -     | -     | -     | -     | -               |
| C-24           | -     | -     | -     | -     | -     | -     | -     | -     | -     | -     | -     | -     | -     | -     | -     | -     | -               |
| C-25           | -     | -     | -     | -     | -     | -     | -     | -     | -     | -     | -     | -     | -     | -     | -     | -     | -               |
| C-26           | -     | -     | -     | -     | -     | -     | -     | -     | -     | -     | -     | -     | -     | -     | -     | -     | -               |
| C-27           | -     | -     | -     | -     | -     | -     | -     | -     | -     | -     | -     | -     | -     | -     | -     | -     | -               |
| C-28           | -     | -     | -     | -     | -     | -     | -     | -     | -     | -     | -     | -     | -     | -     | -     | -     | -               |
| C-29           | -     | -     | -     | -     | -     | -     | -     | -     | -     | -     | -     | -     | -     | -     | -     | -     | -               |
| C-30           | -     | -     | -     | -     | -     | -     | -     | -     | -     | -     | -     | -     | -     | -     | -     | -     | -               |
| n <sub>C</sub> | Cl-35 | Cl-36 | Cl-37 | Cl-38 | Cl-39 | Cl-40 | Cl-41 | Cl-42 | Cl-43 | Cl-44 | Cl-45 | Cl-46 | Cl-47 | Cl-48 | Cl-49 | Cl-50 |                 |
|                | -     | 15.03 | 14.97 | 15.20 | 15.73 | 17.36 | -     | -     | -     | -     | -     | -     | -     | -     | -     | -     | -               |

Normalized homologue-proportion (% relative to the most abundant homologue)

Compound class: Chlorinated triolefin (CtriO)

Sample: Yoga mat

Code: P2

Most Abundant Homologue: C<sub>15</sub>Cl<sub>5</sub> 9.46E+03 cts LOD: 100 cts n (C) 16.08 n (H) 22.78 n (Cl) 5.38  
 p vSC - % p SC - % p MC 87.35 % p LC 12.65 % p vLC - %

|                | Cl-3  | Cl-4  | Cl-5  | Cl-6  | Cl-7  | Cl-8  | Cl-9  | Cl-10 | Cl-11 | Cl-12 | Cl-13 | Cl-14 | Cl-15 | Cl-16 | Cl-17 | Cl-18 | n <sub>Cl</sub> |
|----------------|-------|-------|-------|-------|-------|-------|-------|-------|-------|-------|-------|-------|-------|-------|-------|-------|-----------------|
| C-9            | -     | -     | -     | -     | -     | -     | -     | -     | -     | -     | -     | -     | -     | -     | -     | -     | -               |
| C-10           | -     | -     | -     | -     | -     | -     | -     | -     | -     | -     | -     | -     | -     | -     | -     | -     | -               |
| C-11           | -     | -     | -     | -     | -     | -     | -     | -     | -     | -     | -     | -     | -     | -     | -     | -     | -               |
| C-12           | -     | -     | -     | -     | -     | -     | -     | -     | -     | -     | -     | -     | -     | -     | -     | -     | -               |
| C-13           | -     | -     | -     | -     | -     | -     | -     | -     | -     | -     | -     | -     | -     | -     | -     | -     | -               |
| C-14           | -     | -     | 50.69 | 6.23  | -     | -     | -     | -     | -     | -     | -     | -     | -     | -     | -     | -     | 5.11            |
| C-15           | -     | 11.45 | 100   | 43.34 | -     | -     | -     | -     | -     | -     | -     | -     | -     | -     | -     | -     | 5.21            |
| C-16           | -     | 11.39 | 80.95 | 61.29 | -     | -     | -     | -     | -     | -     | -     | -     | -     | -     | -     | -     | 5.32            |
| C-17           | -     | 11.34 | 70.59 | 63.52 | 19.46 | -     | -     | -     | -     | -     | -     | -     | -     | -     | -     | -     | 5.55            |
| C-18           | -     | -     | 34.30 | 33.04 | 9.44  | -     | -     | -     | -     | -     | -     | -     | -     | -     | -     | -     | 5.68            |
| C-19           | -     | -     | -     | -     | -     | -     | -     | -     | -     | -     | -     | -     | -     | -     | -     | -     | -               |
| C-20           | -     | -     | -     | -     | -     | -     | -     | -     | -     | -     | -     | -     | -     | -     | -     | -     | -               |
| C-21           | -     | -     | -     | -     | -     | -     | -     | -     | -     | -     | -     | -     | -     | -     | -     | -     | -               |
| C-22           | -     | -     | -     | -     | -     | -     | -     | -     | -     | -     | -     | -     | -     | -     | -     | -     | -               |
| C-23           | -     | -     | -     | -     | -     | -     | -     | -     | -     | -     | -     | -     | -     | -     | -     | -     | -               |
| C-24           | -     | -     | -     | -     | -     | -     | -     | -     | -     | -     | -     | -     | -     | -     | -     | -     | -               |
| C-25           | -     | -     | -     | -     | -     | -     | -     | -     | -     | -     | -     | -     | -     | -     | -     | -     | -               |
| C-26           | -     | -     | -     | -     | -     | -     | -     | -     | -     | -     | -     | -     | -     | -     | -     | -     | -               |
| C-27           | -     | -     | -     | -     | -     | -     | -     | -     | -     | -     | -     | -     | -     | -     | -     | -     | -               |
| C-28           | -     | -     | -     | -     | -     | -     | -     | -     | -     | -     | -     | -     | -     | -     | -     | -     | -               |
| C-29           | -     | -     | -     | -     | -     | -     | -     | -     | -     | -     | -     | -     | -     | -     | -     | -     | -               |
| C-30           | -     | -     | -     | -     | -     | -     | -     | -     | -     | -     | -     | -     | -     | -     | -     | -     | -               |
| n <sub>C</sub> | Cl-51 | Cl-52 | Cl-53 | Cl-54 | Cl-55 | Cl-56 | Cl-57 | Cl-58 | Cl-59 | Cl-60 | Cl-61 | Cl-62 | Cl-63 | Cl-64 | Cl-65 | Cl-66 |                 |
|                | -     | 16.00 | 15.82 | 16.36 | 17.33 | -     | -     | -     | -     | -     | -     | -     | -     | -     | -     | -     | -               |

**Table S4.** Normalized proportions (%) of C- and Cl-homologues of CPs, COs, CdiOs and CtriOs compound classes of P3. Data were evaluated by CP-Hunter. Abundances are given relative to the intensity (cts) of the most abundant homologue (MAH). Homologues with an  $MI_{100\%}$  below the limit of detection (LOD) of 100 cts were considered undetected (-). Weighted mean carbon- ( $n_C$ ), hydrogen- ( $n_H$ ) and chlorine- ( $n_{Cl}$ ) numbers are provided per class of compound. Mean chlorine ( $n_{Cl}$ ) and carbon ( $n_C$ ) numbers are also presented per carbon-chain length and per chlorination degree, respectively. Proportions of very short- ( $\rho$  vSC-) short- ( $\rho$  SC-), medium- ( $\rho$  MC-), long- ( $\rho$  LC-) and very long-chain ( $\rho$  vLC-) material are depicted.

Normalized homologue-proportion (% relative to the most abundant homologue) Compound class: Chlorinated paraffin (CP)

Sample: Coating of an electronic cable Code: P3

Most Abundant Homologue:  $C_{14}Cl_6$  5.26E+05 cts LOD: 100 cts n (C) 15.29 n (H) 25.93 n (Cl) 6.65

$\rho$  vSC 0%  $\rho$  SC 26.80%  $\rho$  MC 52.60%  $\rho$  LC 13.75%  $\rho$  vLC 6.80%

|       | Cl-3  | Cl-4  | Cl-5  | Cl-6  | Cl-7  | Cl-8  | Cl-9  | Cl-10 | Cl-11 | Cl-12 | Cl-13 | Cl-14 | Cl-15 | Cl-16 | Cl-17 | Cl-18 | $n_{Cl}$ |
|-------|-------|-------|-------|-------|-------|-------|-------|-------|-------|-------|-------|-------|-------|-------|-------|-------|----------|
| C-9   | -     | -     | 0.07  | 0.38  | 0.17  | -     | -     | -     | -     | -     | -     | -     | -     | -     | -     | -     | 6.16     |
| C-10  | -     | -     | 1.62  | 4.31  | 2.39  | 0.50  | 0.01  | -     | -     | -     | -     | -     | -     | -     | -     | -     | 6.21     |
| C-11  | -     | 0.14  | 5.67  | 13.11 | 8.27  | 2.25  | 0.33  | -     | -     | -     | -     | -     | -     | -     | -     | -     | 6.26     |
| C-12  | -     | 0.35  | 8.69  | 19.74 | 14.27 | 4.65  | 0.91  | 0.04  | -     | -     | -     | -     | -     | -     | -     | -     | 6.35     |
| C-13  | -     | 1.53  | 26.00 | 60.08 | 52.23 | 22.87 | 5.37  | 0.82  | 0.03  | -     | -     | -     | -     | -     | -     | -     | 6.52     |
| C-14  | -     | 3.30  | 43.39 | 100   | 95.26 | 50.43 | 14.79 | 2.84  | 0.36  | -     | -     | -     | -     | -     | -     | -     | 6.66     |
| C-15  | -     | 1.15  | 12.74 | 32.49 | 33.19 | 19.86 | 7.95  | 2.09  | 0.37  | -     | -     | -     | -     | -     | -     | -     | 6.84     |
| C-16  | -     | 0.62  | 5.24  | 12.40 | 13.60 | 9.14  | 4.16  | 1.43  | 0.32  | -     | -     | -     | -     | -     | -     | -     | 6.96     |
| C-17  | -     | 0.64  | 4.48  | 9.28  | 9.58  | 6.74  | 3.34  | 1.23  | 0.34  | 0.02  | -     | -     | -     | -     | -     | -     | 6.96     |
| C-18  | -     | 0.73  | 4.24  | 7.92  | 7.27  | 4.57  | 2.27  | 0.85  | 0.24  | 0.04  | -     | -     | -     | -     | -     | -     | 6.80     |
| C-19  | -     | 1.02  | 5.11  | 8.83  | 7.59  | 4.16  | 1.81  | 0.63  | 0.14  | -     | -     | -     | -     | -     | -     | -     | 6.60     |
| C-20  | 0.03  | 1.36  | 6.92  | 11.45 | 9.96  | 5.60  | 2.22  | 0.73  | 0.17  | -     | -     | -     | -     | -     | -     | -     | 6.57     |
| C-21  | 0.04  | 1.19  | 6.07  | 11.02 | 9.19  | 5.16  | 2.06  | 0.66  | 0.16  | -     | -     | -     | -     | -     | -     | -     | 6.58     |
| C-22  | 0.03  | 0.98  | 4.83  | 9.22  | 8.21  | 4.53  | 2.01  | 0.63  | 0.16  | -     | -     | -     | -     | -     | -     | -     | 6.64     |
| C-23  | -     | 0.55  | 2.89  | 5.55  | 5.25  | 3.11  | 1.37  | 0.48  | 0.13  | -     | -     | -     | -     | -     | -     | -     | 6.73     |
| C-24  | -     | 0.23  | 1.20  | 2.56  | 2.46  | 1.63  | 0.76  | 0.29  | 0.08  | -     | -     | -     | -     | -     | -     | -     | 6.86     |
| C-25  | 0.03  | 0.08  | 0.46  | 1.02  | 1.10  | 0.74  | 0.39  | 0.14  | 0.03  | -     | -     | -     | -     | -     | -     | -     | 6.95     |
| C-26  | -     | -     | 0.15  | 0.36  | 0.41  | 0.28  | 0.16  | 0.05  | -     | -     | -     | -     | -     | -     | -     | -     | 7.07     |
| C-27  | -     | -     | 0.03  | 0.11  | 0.11  | 0.07  | 0.04  | -     | -     | -     | -     | -     | -     | -     | -     | -     | 6.96     |
| C-28  | -     | -     | -     | 0.04  | 0.03  | -     | -     | -     | -     | -     | -     | -     | -     | -     | -     | -     | 6.44     |
| C-29  | -     | -     | -     | -     | -     | -     | -     | -     | -     | -     | -     | -     | -     | -     | -     | -     | -        |
| C-30  | -     | -     | -     | -     | -     | -     | -     | -     | -     | -     | -     | -     | -     | -     | -     | -     | -        |
| $n_C$ | Cl-3  | Cl-4  | Cl-5  | Cl-6  | Cl-7  | Cl-8  | Cl-9  | Cl-10 | Cl-11 | Cl-12 | Cl-13 | Cl-14 | Cl-15 | Cl-16 | Cl-17 | Cl-18 |          |
|       | 21.85 | 17.04 | 15.29 | 15.02 | 15.14 | 15.50 | 16.13 | 16.93 | 17.69 | 17.71 | -     | -     | -     | -     | -     | -     |          |

Normalized homologue-proportion (% relative to the most abundant homologue) Compound class: Chlorinated olefin (CO)

Sample: Coating of an electronic cable Code: P3

Most Abundant Homologue:  $C_{14}Cl_6$  5.33E+04 cts LOD: 100 cts n (C) 16.87 n (H) 27.52 n (Cl) 6.22

$\rho$  vSC -%  $\rho$  SC 15%  $\rho$  MC 46%  $\rho$  LC 25%  $\rho$  vLC 14%

|       | Cl-3  | Cl-4  | Cl-5  | Cl-6  | Cl-7  | Cl-8  | Cl-9  | Cl-10 | Cl-11 | Cl-12 | Cl-13 | Cl-14 | Cl-15 | Cl-16 | Cl-17 | Cl-18 | $n_{Cl}$ |
|-------|-------|-------|-------|-------|-------|-------|-------|-------|-------|-------|-------|-------|-------|-------|-------|-------|----------|
| C-9   | -     | -     | -     | -     | -     | -     | -     | -     | -     | -     | -     | -     | -     | -     | -     | -     | -        |
| C-10  | -     | -     | 1.10  | 1.20  | 0.25  | -     | -     | -     | -     | -     | -     | -     | -     | -     | -     | -     | 5.67     |
| C-11  | -     | 0.41  | 4.20  | 5.24  | 1.86  | -     | -     | -     | -     | -     | -     | -     | -     | -     | -     | -     | 5.73     |
| C-12  | -     | 0.90  | 8.41  | 11.41 | 4.48  | 0.65  | -     | -     | -     | -     | -     | -     | -     | -     | -     | -     | 5.83     |
| C-13  | -     | 4.20  | 34.12 | 47.03 | 24.20 | 5.84  | 0.38  | -     | -     | -     | -     | -     | -     | -     | -     | -     | 5.95     |
| C-14  | -     | 10.31 | 71.49 | 100   | 60.81 | 16.98 | 2.51  | -     | -     | -     | -     | -     | -     | -     | -     | -     | 6.04     |
| C-15  | -     | 4.35  | 27.36 | 42.74 | 30.05 | 10.68 | 2.60  | -     | -     | -     | -     | -     | -     | -     | -     | -     | 6.20     |
| C-16  | -     | 2.48  | 12.95 | 20.71 | 15.81 | 6.81  | 1.97  | -     | -     | -     | -     | -     | -     | -     | -     | -     | 6.29     |
| C-17  | -     | 2.61  | 11.35 | 17.37 | 13.18 | 6.39  | 2.09  | 0.27  | -     | -     | -     | -     | -     | -     | -     | -     | 6.31     |
| C-18  | -     | 3.26  | 11.41 | 16.19 | 12.09 | 6.15  | 2.06  | 0.28  | -     | -     | -     | -     | -     | -     | -     | -     | 6.27     |
| C-19  | -     | 4.35  | 14.00 | 18.74 | 14.43 | 7.48  | 2.63  | 0.46  | 0.10  | -     | -     | -     | -     | -     | -     | -     | 6.27     |
| C-20  | -     | 5.60  | 18.16 | 23.89 | 19.95 | 11.46 | 4.55  | 0.79  | -     | -     | -     | -     | -     | -     | -     | -     | 6.36     |
| C-21  | -     | 4.90  | 15.10 | 21.08 | 17.49 | 9.55  | 3.65  | 0.59  | -     | -     | -     | -     | -     | -     | -     | -     | 6.35     |
| C-22  | -     | 3.70  | 11.60 | 17.50 | 15.56 | 8.74  | 3.59  | 0.78  | -     | -     | -     | -     | -     | -     | -     | -     | 6.45     |
| C-23  | -     | 2.00  | 7.09  | 11.77 | 11.35 | 6.99  | 3.09  | 0.91  | -     | -     | -     | -     | -     | -     | -     | -     | 6.63     |
| C-24  | -     | 0.83  | 3.47  | 6.64  | 6.78  | 4.91  | 2.25  | 0.90  | -     | -     | -     | -     | -     | -     | -     | -     | 6.85     |
| C-25  | -     | -     | 1.55  | 3.22  | 3.70  | 2.76  | 1.40  | 0.60  | -     | -     | -     | -     | -     | -     | -     | -     | 7.08     |
| C-26  | -     | -     | 0.48  | 1.18  | 1.53  | 0.98  | 0.69  | -     | -     | -     | -     | -     | -     | -     | -     | -     | 7.04     |
| C-27  | -     | -     | -     | 0.29  | 0.40  | 0.15  | -     | -     | -     | -     | -     | -     | -     | -     | -     | -     | 6.84     |
| C-28  | -     | -     | -     | -     | -     | -     | -     | -     | -     | -     | -     | -     | -     | -     | -     | -     | -        |
| C-29  | -     | -     | -     | -     | -     | -     | -     | -     | -     | -     | -     | -     | -     | -     | -     | -     | -        |
| C-30  | -     | -     | -     | -     | -     | -     | -     | -     | -     | -     | -     | -     | -     | -     | -     | -     | -        |
| $n_C$ | Cl-19 | Cl-20 | Cl-21 | Cl-22 | Cl-23 | Cl-24 | Cl-25 | Cl-26 | Cl-27 | Cl-28 | Cl-29 | Cl-30 | Cl-31 | Cl-32 | Cl-33 | Cl-34 |          |
|       | -     | 17.38 | 16.22 | 16.35 | 17.08 | 18.32 | 19.66 | 21.73 | 19.00 | -     | -     | -     | -     | -     | -     | -     |          |

Normalized homologue-proportion (% relative to the most abundant homologue)

Compound class: Chlorinated diolefin (CdiO)

Sample: Coating of an electronic cable

Code: P3

Most Abundant Homologue: C<sub>14</sub>Cl<sub>5</sub> 6.23E+03 cts LOD: 100 cts n (C) 18.78 n (H) 29.75 n (Cl) 5.82

p vSC - % p SC 4 % p MC 32 % p LC 40 % p vLC 24 %

|                | CI-3  | CI-4  | CI-5  | CI-6  | CI-7  | CI-8  | CI-9  | CI-10 | CI-11 | CI-12 | CI-13 | CI-14 | CI-15 | CI-16 | CI-17 | CI-18 | n <sub>Cl</sub> |
|----------------|-------|-------|-------|-------|-------|-------|-------|-------|-------|-------|-------|-------|-------|-------|-------|-------|-----------------|
| C-9            | -     | -     | -     | -     | -     | -     | -     | -     | -     | -     | -     | -     | -     | -     | -     | -     | -               |
| C-10           | -     | -     | -     | -     | -     | -     | -     | -     | -     | -     | -     | -     | -     | -     | -     | -     | -               |
| C-11           | -     | -     | -     | -     | -     | -     | -     | -     | -     | -     | -     | -     | -     | -     | -     | -     | -               |
| C-12           | -     | -     | 2.91  | -     | -     | -     | -     | -     | -     | -     | -     | -     | -     | -     | -     | -     | 5.00            |
| C-13           | -     | 4.65  | 29.58 | 20.13 | -     | -     | -     | -     | -     | -     | -     | -     | -     | -     | -     | -     | 5.28            |
| C-14           | -     | 21.58 | 100   | 74.17 | 15.29 | -     | -     | -     | -     | -     | -     | -     | -     | -     | -     | -     | 5.39            |
| C-15           | -     | 12.25 | 53.06 | 45.12 | 6.23  | -     | -     | -     | -     | -     | -     | -     | -     | -     | -     | -     | 5.39            |
| C-16           | -     | 7.89  | 31.22 | 29.43 | 11.49 | -     | -     | -     | -     | -     | -     | -     | -     | -     | -     | -     | 5.56            |
| C-17           | -     | 9.49  | 29.65 | 30.07 | 13.95 | 2.59  | -     | -     | -     | -     | -     | -     | -     | -     | -     | -     | 5.66            |
| C-18           | -     | 7.86  | 31.08 | 31.46 | 16.51 | 6.09  | -     | -     | -     | -     | -     | -     | -     | -     | -     | -     | 5.81            |
| C-19           | -     | 18.62 | 40.34 | 38.44 | 24.98 | 10.99 | 3.09  | -     | -     | -     | -     | -     | -     | -     | -     | -     | 5.84            |
| C-20           | -     | 28.01 | 54.20 | 52.22 | 36.67 | 20.56 | 7.38  | 2.08  | -     | -     | -     | -     | -     | -     | -     | -     | 5.99            |
| C-21           | -     | 27.40 | 50.71 | 49.85 | 35.02 | 18.78 | 7.53  | 0.85  | -     | -     | -     | -     | -     | -     | -     | -     | 5.96            |
| C-22           | -     | 22.99 | 39.87 | 41.65 | 31.98 | 17.19 | 6.39  | -     | -     | -     | -     | -     | -     | -     | -     | -     | 6.00            |
| C-23           | -     | 12.91 | 24.45 | 27.89 | 23.21 | 14.22 | 5.36  | -     | -     | -     | -     | -     | -     | -     | -     | -     | 6.16            |
| C-24           | -     | 5.32  | 12.41 | 17.22 | 16.44 | 9.38  | 4.80  | 0.91  | -     | -     | -     | -     | -     | -     | -     | -     | 6.45            |
| C-25           | -     | -     | 4.78  | 8.71  | 9.30  | 3.87  | 2.09  | -     | -     | -     | -     | -     | -     | -     | -     | -     | 6.64            |
| C-26           | -     | -     | -     | 2.75  | -     | 2.70  | -     | -     | -     | -     | -     | -     | -     | -     | -     | -     | 6.99            |
| C-27           | -     | -     | -     | -     | -     | -     | -     | -     | -     | -     | -     | -     | -     | -     | -     | -     | -               |
| C-28           | -     | -     | -     | -     | -     | -     | -     | -     | -     | -     | -     | -     | -     | -     | -     | -     | -               |
| C-29           | -     | -     | -     | -     | -     | -     | -     | -     | -     | -     | -     | -     | -     | -     | -     | -     | -               |
| C-30           | -     | -     | -     | -     | -     | -     | -     | -     | -     | -     | -     | -     | -     | -     | -     | -     | -               |
| n <sub>C</sub> | CI-35 | CI-36 | CI-37 | CI-38 | CI-39 | CI-40 | CI-41 | CI-42 | CI-43 | CI-44 | CI-45 | CI-46 | CI-47 | CI-48 | CI-49 | CI-50 |                 |
| -              | 18.97 | 17.75 | 18.35 | 20.05 | 21.30 | 21.72 | 21.17 | -     | -     | -     | -     | -     | -     | -     | -     | -     | -               |

Normalized homologue-proportion (% relative to the most abundant homologue)

Compound class: Chlorinated triolefin (CtriO)

Sample: Coating of an electronic cable

Code: P3

Most Abundant Homologue: C<sub>21</sub>Cl<sub>5</sub> 1.05E+03 cts LOD: 100 cts n (C) 20.50 n (H) 31.45 n (Cl) 5.55

p vSC - % p SC - % p MC 9 % p LC 58 % p vLC 33 %

|                | CI-3  | CI-4  | CI-5  | CI-6  | CI-7  | CI-8  | CI-9  | CI-10 | CI-11 | CI-12 | CI-13 | CI-14 | CI-15 | CI-16 | CI-17 | CI-18 | n <sub>Cl</sub> |
|----------------|-------|-------|-------|-------|-------|-------|-------|-------|-------|-------|-------|-------|-------|-------|-------|-------|-----------------|
| C-9            | -     | -     | -     | -     | -     | -     | -     | -     | -     | -     | -     | -     | -     | -     | -     | -     | -               |
| C-10           | -     | -     | -     | -     | -     | -     | -     | -     | -     | -     | -     | -     | -     | -     | -     | -     | -               |
| C-11           | -     | -     | -     | -     | -     | -     | -     | -     | -     | -     | -     | -     | -     | -     | -     | -     | -               |
| C-12           | -     | -     | -     | -     | -     | -     | -     | -     | -     | -     | -     | -     | -     | -     | -     | -     | -               |
| C-13           | -     | -     | -     | -     | -     | -     | -     | -     | -     | -     | -     | -     | -     | -     | -     | -     | -               |
| C-14           | -     | -     | 31.37 | -     | -     | -     | -     | -     | -     | -     | -     | -     | -     | -     | -     | -     | 5.00            |
| C-15           | -     | -     | 27.54 | -     | -     | -     | -     | -     | -     | -     | -     | -     | -     | -     | -     | -     | 5.00            |
| C-16           | -     | -     | 22.33 | -     | -     | -     | -     | -     | -     | -     | -     | -     | -     | -     | -     | -     | 5.00            |
| C-17           | -     | -     | 30.45 | 14.50 | -     | -     | -     | -     | -     | -     | -     | -     | -     | -     | -     | -     | 5.32            |
| C-18           | -     | 5.44  | 36.40 | 18.16 | -     | -     | -     | -     | -     | -     | -     | -     | -     | -     | -     | -     | 5.21            |
| C-19           | -     | 30.16 | 56.43 | 43.35 | 16.97 | -     | -     | -     | -     | -     | -     | -     | -     | -     | -     | -     | 5.32            |
| C-20           | -     | 55.85 | 88.77 | 73.28 | 47.91 | 26.80 | -     | -     | -     | -     | -     | -     | -     | -     | -     | -     | 5.66            |
| C-21           | -     | 63.85 | 100   | 83.73 | 57.01 | 33.69 | -     | -     | -     | -     | -     | -     | -     | -     | -     | -     | 5.69            |
| C-22           | -     | 57.26 | 79.07 | 71.84 | 48.17 | 29.47 | 5.36  | -     | -     | -     | -     | -     | -     | -     | -     | -     | 5.76            |
| C-23           | -     | 36.55 | 43.85 | 40.27 | 29.90 | -     | -     | -     | -     | -     | -     | -     | -     | -     | -     | -     | 5.42            |
| C-24           | -     | 5.09  | 19.27 | 17.87 | -     | -     | -     | -     | -     | -     | -     | -     | -     | -     | -     | -     | 5.30            |
| C-25           | -     | -     | -     | -     | -     | -     | -     | -     | -     | -     | -     | -     | -     | -     | -     | -     | -               |
| C-26           | -     | -     | -     | -     | -     | -     | -     | -     | -     | -     | -     | -     | -     | -     | -     | -     | -               |
| C-27           | -     | -     | -     | -     | -     | -     | -     | -     | -     | -     | -     | -     | -     | -     | -     | -     | -               |
| C-28           | -     | -     | -     | -     | -     | -     | -     | -     | -     | -     | -     | -     | -     | -     | -     | -     | -               |
| C-29           | -     | -     | -     | -     | -     | -     | -     | -     | -     | -     | -     | -     | -     | -     | -     | -     | -               |
| C-30           | -     | -     | -     | -     | -     | -     | -     | -     | -     | -     | -     | -     | -     | -     | -     | -     | -               |
| n <sub>C</sub> | CI-51 | CI-52 | CI-53 | CI-54 | CI-55 | CI-56 | CI-57 | CI-58 | CI-59 | CI-60 | CI-61 | CI-62 | CI-63 | CI-64 | CI-65 | CI-66 |                 |
| -              | 21.05 | 19.68 | 20.82 | 21.13 | 21.03 | 22.00 | -     | -     | -     | -     | -     | -     | -     | -     | -     | -     | -               |

**Table S5.** Normalized proportions (%) of C- and Cl-homologues of CPs, COs, CdiOs and CtriOs compound classes of PI. Data were evaluated by RASER. Abundances are given relative to the intensity (cts) of the most abundant homologue (MAH). Homologues with an  $MI_{100\%}$  below the limit of detection (LOD) of 100 cts were considered undetected (-). Weighted mean carbon- ( $n_C$ ), hydrogen- ( $n_H$ ) and chlorine- ( $n_{Cl}$ ) numbers are provided per class of compound. Mean chlorine ( $n_{Cl}$ ) and carbon ( $n_C$ ) numbers are also presented per carbon-chain length and per chlorination degree, respectively. Proportions of very short- ( $\rho$  vSC-) short- ( $\rho$  SC-), medium- ( $\rho$  MC-), long- ( $\rho$  LC-) and very long-chain ( $\rho$  vLC-) material are depicted.

| Normalized homologue-proportion (% relative to the most abundant homologue) |       |       |       |       |       |       |       |       |       |       |       |       |       |       |       |       | Compound class: Chlorinated paraffin (CP) |               |               |                |             |
|-----------------------------------------------------------------------------|-------|-------|-------|-------|-------|-------|-------|-------|-------|-------|-------|-------|-------|-------|-------|-------|-------------------------------------------|---------------|---------------|----------------|-------------|
| Sample: Sewage sludge                                                       |       |       |       |       |       |       |       |       |       |       |       |       |       |       |       |       | Code: P1                                  |               |               |                |             |
| Most Abundant Homologue: $C_{15}Cl_6$                                       |       |       |       |       |       |       |       |       |       |       |       |       |       |       |       |       | 3.60E+05                                  | LOD: 100      | n (C) 16.08   | n (H) 27.58    | n (Cl) 6.57 |
| p vSC: - %                                                                  |       |       |       |       |       |       |       |       |       |       |       |       |       |       |       |       | p SC: 20.96 %                             | p MC: 55.62 % | p LC: 12.48 % | p vLC: 10.94 % |             |
| C-9                                                                         | Cl-3  | Cl-4  | Cl-5  | Cl-6  | Cl-7  | Cl-8  | Cl-9  | Cl-10 | Cl-11 | Cl-12 | Cl-13 | Cl-14 | Cl-15 | Cl-16 | Cl-17 | Cl-18 | $n_{Cl}$                                  |               |               |                |             |
| C-9                                                                         | -     | -     | -     | -     | -     | -     | -     | -     | -     | -     | -     | -     | -     | -     | -     | -     | -                                         |               |               |                |             |
| C-10                                                                        | -     | -     | 1.42  | 4.09  | 3.23  | 0.91  | 0.07  | -     | -     | -     | -     | -     | -     | -     | -     | -     | 6.39                                      |               |               |                |             |
| C-11                                                                        | -     | 0.46  | 7.92  | 27.64 | 32.03 | 13.37 | 2.74  | 0.32  | -     | -     | -     | -     | -     | -     | -     | -     | 6.70                                      |               |               |                |             |
| C-12                                                                        | -     | 1.13  | 11.92 | 31.89 | 45.03 | 30.53 | 9.11  | 1.68  | 0.13  | -     | -     | -     | -     | -     | -     | -     | 6.96                                      |               |               |                |             |
| C-13                                                                        | -     | 3.59  | 21.65 | 31.82 | 29.67 | 21.36 | 10.38 | 2.56  | 0.31  | -     | -     | -     | -     | -     | -     | -     | 6.71                                      |               |               |                |             |
| C-14                                                                        | -     | 16.69 | 80.57 | 98.92 | 63.27 | 20.09 | 4.95  | 1.08  | 0.08  | -     | -     | -     | -     | -     | -     | -     | 6.03                                      |               |               |                |             |
| C-15                                                                        | 0.16  | 18.04 | 80.58 | 100   | 71.58 | 28.00 | 6.71  | 1.22  | -     | -     | -     | -     | -     | -     | -     | -     | 6.12                                      |               |               |                |             |
| C-16                                                                        | 0.13  | 10.62 | 44.18 | 58.98 | 48.25 | 25.12 | 7.71  | 1.52  | -     | -     | -     | -     | -     | -     | -     | -     | 6.32                                      |               |               |                |             |
| C-17                                                                        | -     | 6.31  | 23.98 | 36.77 | 33.29 | 21.38 | 8.61  | 2.06  | -     | -     | -     | -     | -     | -     | -     | -     | 6.56                                      |               |               |                |             |
| C-18                                                                        | 0.12  | 4.32  | 14.98 | 22.32 | 27.17 | 21.98 | 13.09 | 4.63  | 0.89  | -     | -     | -     | -     | -     | -     | -     | 7.00                                      |               |               |                |             |
| C-19                                                                        | 0.08  | 2.08  | 6.22  | 9.48  | 11.60 | 10.85 | 7.16  | 3.11  | 0.77  | 0.08  | -     | -     | -     | -     | -     | -     | 7.18                                      |               |               |                |             |
| C-20                                                                        | 0.08  | 1.30  | 3.17  | 4.91  | 5.78  | 5.16  | 3.32  | 1.50  | 0.64  | -     | -     | -     | -     | -     | -     | -     | 7.13                                      |               |               |                |             |
| C-21                                                                        | -     | 1.22  | 2.50  | 3.89  | 4.43  | 3.81  | 2.48  | 1.04  | 0.38  | 0.09  | -     | -     | -     | -     | -     | -     | 7.07                                      |               |               |                |             |
| C-22                                                                        | 0.15  | 1.50  | 2.95  | 4.39  | 5.26  | 4.11  | 2.70  | 1.17  | 0.44  | -     | -     | -     | -     | -     | -     | -     | 6.97                                      |               |               |                |             |
| C-23                                                                        | 0.17  | 1.44  | 3.32  | 4.99  | 5.92  | 5.14  | 3.12  | 1.46  | 0.59  | 0.22  | 0.08  | -     | -     | -     | -     | -     | 7.12                                      |               |               |                |             |
| C-24                                                                        | 0.18  | 1.35  | 3.07  | 5.38  | 6.39  | 6.00  | 3.71  | 1.86  | 0.76  | 0.31  | 0.23  | -     | -     | -     | -     | -     | 7.30                                      |               |               |                |             |
| C-25                                                                        | -     | 1.14  | 2.48  | 4.51  | 6.37  | 5.58  | 3.75  | 1.93  | 0.82  | 0.34  | 0.12  | -     | -     | -     | -     | -     | 7.43                                      |               |               |                |             |
| C-26                                                                        | 0.15  | 1.02  | 2.05  | 3.52  | 5.09  | 5.18  | 3.88  | 2.02  | 0.93  | 0.39  | 0.14  | 0.14  | -     | -     | -     | -     | 7.62                                      |               |               |                |             |
| C-27                                                                        | -     | 0.83  | 1.58  | 2.50  | 3.65  | 3.96  | 3.33  | 1.87  | 0.91  | 0.36  | 0.13  | -     | -     | -     | -     | -     | 7.75                                      |               |               |                |             |
| C-28                                                                        | -     | 0.60  | 1.19  | 1.81  | 2.48  | 2.88  | 2.57  | 1.58  | 0.82  | 0.34  | -     | -     | -     | -     | -     | -     | 7.82                                      |               |               |                |             |
| C-29                                                                        | 0.12  | 0.47  | 0.88  | 1.26  | 1.73  | 2.06  | 1.80  | 1.24  | 0.67  | 0.28  | 0.09  | -     | -     | -     | -     | -     | 7.86                                      |               |               |                |             |
| C-30                                                                        | -     | 0.35  | 0.60  | 0.86  | 1.14  | 1.36  | 1.26  | 0.93  | 0.53  | 0.24  | -     | -     | -     | -     | -     | -     | 7.95                                      |               |               |                |             |
| $n_C$                                                                       | Cl-3  | Cl-4  | Cl-5  | Cl-6  | Cl-7  | Cl-8  | Cl-9  | Cl-10 | Cl-11 | Cl-12 | Cl-13 | Cl-14 | Cl-15 | Cl-16 | Cl-17 | Cl-18 |                                           |               |               |                |             |
|                                                                             | 21.38 | 16.55 | 15.54 | 15.40 | 15.67 | 16.61 | 18.27 | 20.34 | 23.50 | 26.08 | 25.47 | 26.00 | -     | -     | -     | -     |                                           |               |               |                |             |

| Normalized homologue-proportion (% relative to the most abundant homologue) |       |       |       |       |       |       |       |       |       |       |       |       |       |       |       |       | Compound class: Chlorinated olefin (CO) |               |              |               |             |
|-----------------------------------------------------------------------------|-------|-------|-------|-------|-------|-------|-------|-------|-------|-------|-------|-------|-------|-------|-------|-------|-----------------------------------------|---------------|--------------|---------------|-------------|
| Sample: Sewage sludge                                                       |       |       |       |       |       |       |       |       |       |       |       |       |       |       |       |       | Code: P1                                |               |              |               |             |
| Most Abundant Homologue: $C_{15}Cl_5$                                       |       |       |       |       |       |       |       |       |       |       |       |       |       |       |       |       | 3.54E+04                                | LOD: 100      | n (C) 14.74  | n (H) 23.47   | n (Cl) 6.02 |
| p vSC: - %                                                                  |       |       |       |       |       |       |       |       |       |       |       |       |       |       |       |       | p SC: 30.87 %                           | p MC: 58.04 % | p LC: 9.87 % | p vLC: 1.22 % |             |
| C-9                                                                         | Cl-3  | Cl-4  | Cl-5  | Cl-6  | Cl-7  | Cl-8  | Cl-9  | Cl-10 | Cl-11 | Cl-12 | Cl-13 | Cl-14 | Cl-15 | Cl-16 | Cl-17 | Cl-18 | $n_{Cl}$                                |               |              |               |             |
| C-9                                                                         | -     | -     | -     | -     | -     | -     | -     | -     | -     | -     | -     | -     | -     | -     | -     | -     | -                                       |               |              |               |             |
| C-10                                                                        | -     | -     | 2.10  | 3.29  | 0.97  | -     | -     | -     | -     | -     | -     | -     | -     | -     | -     | -     | 5.82                                    |               |              |               |             |
| C-11                                                                        | -     | -     | 16.70 | 42.84 | 25.59 | 5.76  | -     | -     | -     | -     | -     | -     | -     | -     | -     | -     | 6.22                                    |               |              |               |             |
| C-12                                                                        | -     | 1.29  | 22.93 | 77.97 | 63.52 | 22.76 | 2.97  | -     | -     | -     | -     | -     | -     | -     | -     | -     | 6.48                                    |               |              |               |             |
| C-13                                                                        | -     | 3.32  | 21.20 | 47.99 | 56.17 | 26.54 | 5.57  | -     | -     | -     | -     | -     | -     | -     | -     | -     | 6.61                                    |               |              |               |             |
| C-14                                                                        | -     | 19.48 | 78.14 | 73.57 | 38.54 | 10.08 | -     | -     | -     | -     | -     | -     | -     | -     | -     | -     | 5.73                                    |               |              |               |             |
| C-15                                                                        | -     | 26.43 | 100   | 96.07 | 48.19 | 10.88 | 1.34  | -     | -     | -     | -     | -     | -     | -     | -     | -     | 5.72                                    |               |              |               |             |
| C-16                                                                        | -     | 18.08 | 64.12 | 69.28 | 37.37 | 12.68 | 1.76  | -     | -     | -     | -     | -     | -     | -     | -     | -     | 5.84                                    |               |              |               |             |
| C-17                                                                        | -     | 12.90 | 37.52 | 46.81 | 28.98 | 10.95 | 2.09  | -     | -     | -     | -     | -     | -     | -     | -     | -     | 5.96                                    |               |              |               |             |
| C-18                                                                        | -     | 7.89  | 21.93 | 29.14 | 25.10 | 13.59 | -     | -     | -     | -     | -     | -     | -     | -     | -     | -     | 6.15                                    |               |              |               |             |
| C-19                                                                        | -     | 3.02  | 7.91  | 9.72  | 9.48  | -     | -     | -     | -     | -     | -     | -     | -     | -     | -     | -     | 5.85                                    |               |              |               |             |
| C-20                                                                        | -     | 1.32  | 2.94  | 3.55  | 3.19  | -     | -     | -     | -     | -     | -     | -     | -     | -     | -     | -     | 5.78                                    |               |              |               |             |
| C-21                                                                        | -     | 0.96  | 1.70  | 2.22  | -     | -     | -     | -     | -     | -     | -     | -     | -     | -     | -     | -     | 5.26                                    |               |              |               |             |
| C-22                                                                        | -     | 0.97  | 1.52  | 1.91  | -     | -     | -     | -     | -     | -     | -     | -     | -     | -     | -     | -     | 5.21                                    |               |              |               |             |
| C-23                                                                        | -     | 0.75  | 1.51  | 1.83  | -     | -     | -     | -     | -     | -     | -     | -     | -     | -     | -     | -     | 5.26                                    |               |              |               |             |
| C-24                                                                        | -     | 0.68  | 1.37  | 1.85  | -     | -     | -     | -     | -     | -     | -     | -     | -     | -     | -     | -     | 5.30                                    |               |              |               |             |
| C-25                                                                        | -     | 0.51  | 1.18  | 1.58  | -     | -     | -     | -     | -     | -     | -     | -     | -     | -     | -     | -     | 5.33                                    |               |              |               |             |
| C-26                                                                        | -     | 0.38  | 0.99  | -     | -     | -     | -     | -     | -     | -     | -     | -     | -     | -     | -     | -     | 4.72                                    |               |              |               |             |
| C-27                                                                        | -     | -     | 0.81  | -     | -     | -     | -     | -     | -     | -     | -     | -     | -     | -     | -     | -     | 5.00                                    |               |              |               |             |
| C-28                                                                        | -     | -     | -     | -     | -     | -     | -     | -     | -     | -     | -     | -     | -     | -     | -     | -     | -                                       |               |              |               |             |
| C-29                                                                        | -     | -     | -     | -     | -     | -     | -     | -     | -     | -     | -     | -     | -     | -     | -     | -     | -                                       |               |              |               |             |
| C-30                                                                        | -     | -     | -     | -     | -     | -     | -     | -     | -     | -     | -     | -     | -     | -     | -     | -     | -                                       |               |              |               |             |
| $n_C$                                                                       | Cl-19 | Cl-20 | Cl-21 | Cl-22 | Cl-23 | Cl-24 | Cl-25 | Cl-26 | Cl-27 | Cl-28 | Cl-29 | Cl-30 | Cl-31 | Cl-32 | Cl-33 | Cl-34 |                                         |               |              |               |             |
|                                                                             | -     | 15.92 | 15.16 | 14.59 | 14.34 | 14.30 | 13.97 | -     | -     | -     | -     | -     | -     | -     | -     | -     |                                         |               |              |               |             |



Normalized homologue-proportion (% relative to the most abundant homologue)

Compound class: Chlorinated diolefin (CdiO)

Sample: Sewage sludge

Code: P1

Most Abundant Homologue: C16Cl5      8.60E+03 cts      LOD: 100 cts      n (C) 16.33      n (H) 25.49      n (Cl) 5.18  
 p vSC - %      p SC 8.61 %      p MC 64.52 %      p LC 25.01 %      p vLC 1.86 %

|                | Cl-3  | Cl-4  | Cl-5  | Cl-6  | Cl-7  | Cl-8  | Cl-9  | Cl-10 | Cl-11 | Cl-12 | Cl-13 | Cl-14 | Cl-15 | Cl-16 | Cl-17 | Cl-18 | n <sub>Cl</sub> |
|----------------|-------|-------|-------|-------|-------|-------|-------|-------|-------|-------|-------|-------|-------|-------|-------|-------|-----------------|
| C-9            | -     | -     | -     | -     | -     | -     | -     | -     | -     | -     | -     | -     | -     | -     | -     | -     | -               |
| C-10           | -     | -     | -     | -     | -     | -     | -     | -     | -     | -     | -     | -     | -     | -     | -     | -     | -               |
| C-11           | -     | -     | 2.60  | -     | -     | -     | -     | -     | -     | -     | -     | -     | -     | -     | -     | -     | 5.00            |
| C-12           | -     | -     | 14.10 | 17.72 | -     | -     | -     | -     | -     | -     | -     | -     | -     | -     | -     | -     | 5.56            |
| C-13           | -     | -     | 13.68 | 25.07 | -     | -     | -     | -     | -     | -     | -     | -     | -     | -     | -     | -     | 5.65            |
| C-14           | -     | 13.35 | 33.87 | -     | -     | -     | -     | -     | -     | -     | -     | -     | -     | -     | -     | -     | 4.72            |
| C-15           | -     | 29.51 | 84.41 | 40.31 | -     | -     | -     | -     | -     | -     | -     | -     | -     | -     | -     | -     | 5.07            |
| C-16           | -     | 33.10 | 100   | 56.54 | -     | -     | -     | -     | -     | -     | -     | -     | -     | -     | -     | -     | 5.12            |
| C-17           | -     | 28.77 | 70.35 | 57.94 | -     | -     | -     | -     | -     | -     | -     | -     | -     | -     | -     | -     | 5.19            |
| C-18           | -     | -     | 69.12 | 62.20 | -     | -     | -     | -     | -     | -     | -     | -     | -     | -     | -     | -     | 5.47            |
| C-19           | -     | 10.67 | 28.37 | 24.13 | -     | -     | -     | -     | -     | -     | -     | -     | -     | -     | -     | -     | 5.21            |
| C-20           | -     | 4.16  | 11.06 | -     | -     | -     | -     | -     | -     | -     | -     | -     | -     | -     | -     | -     | 4.73            |
| C-21           | -     | 2.77  | -     | -     | -     | -     | -     | -     | -     | -     | -     | -     | -     | -     | -     | -     | 4.00            |
| C-22           | -     | 2.45  | 4.93  | -     | -     | -     | -     | -     | -     | -     | -     | -     | -     | -     | -     | -     | 4.67            |
| C-23           | -     | 2.89  | 4.35  | -     | -     | -     | -     | -     | -     | -     | -     | -     | -     | -     | -     | -     | 4.60            |
| C-24           | -     | -     | -     | -     | -     | -     | -     | -     | -     | -     | -     | -     | -     | -     | -     | -     | -               |
| C-25           | -     | 1.19  | -     | -     | -     | -     | -     | -     | -     | -     | -     | -     | -     | -     | -     | -     | 4.00            |
| C-26           | -     | -     | -     | -     | -     | -     | -     | -     | -     | -     | -     | -     | -     | -     | -     | -     | -               |
| C-27           | -     | -     | -     | -     | -     | -     | -     | -     | -     | -     | -     | -     | -     | -     | -     | -     | -               |
| C-28           | -     | -     | -     | -     | -     | -     | -     | -     | -     | -     | -     | -     | -     | -     | -     | -     | -               |
| C-29           | -     | -     | -     | -     | -     | -     | -     | -     | -     | -     | -     | -     | -     | -     | -     | -     | -               |
| C-30           | -     | -     | -     | -     | -     | -     | -     | -     | -     | -     | -     | -     | -     | -     | -     | -     | -               |
| n <sub>C</sub> | Cl-35 | Cl-36 | Cl-37 | Cl-38 | Cl-39 | Cl-40 | Cl-41 | Cl-42 | Cl-43 | Cl-44 | Cl-45 | Cl-46 | Cl-47 | Cl-48 | Cl-49 | Cl-50 |                 |
|                | -     | 16.63 | 16.31 | 16.24 | -     | -     | -     | -     | -     | -     | -     | -     | -     | -     | -     | -     | -               |

Normalized homologue-proportion (% relative to the most abundant homologue)

Compound class: Chlorinated triolefin (CtriO)

Sample: Sewage sludge

Code: P1

Most Abundant Homologue: C18Cl5      2.63E+03 cts      LOD: 100 cts      n (C) 17.69      n (H) 26.34      n (Cl) 5.05  
 p vSC - %      p SC - %      p MC 42.92 %      p LC 49.53 %      p vLC 7.55 %

|                | Cl-3  | Cl-4  | Cl-5  | Cl-6  | Cl-7  | Cl-8  | Cl-9  | Cl-10 | Cl-11 | Cl-12 | Cl-13 | Cl-14 | Cl-15 | Cl-16 | Cl-17 | Cl-18 | n <sub>Cl</sub> |
|----------------|-------|-------|-------|-------|-------|-------|-------|-------|-------|-------|-------|-------|-------|-------|-------|-------|-----------------|
| C-9            | -     | -     | -     | -     | -     | -     | -     | -     | -     | -     | -     | -     | -     | -     | -     | -     | -               |
| C-10           | -     | -     | -     | -     | -     | -     | -     | -     | -     | -     | -     | -     | -     | -     | -     | -     | -               |
| C-11           | -     | -     | -     | -     | -     | -     | -     | -     | -     | -     | -     | -     | -     | -     | -     | -     | -               |
| C-12           | -     | -     | -     | -     | -     | -     | -     | -     | -     | -     | -     | -     | -     | -     | -     | -     | -               |
| C-13           | -     | -     | -     | -     | -     | -     | -     | -     | -     | -     | -     | -     | -     | -     | -     | -     | -               |
| C-14           | -     | -     | -     | -     | 83.85 | -     | -     | -     | -     | -     | -     | -     | -     | -     | -     | -     | 7.00            |
| C-15           | -     | 13.49 | 17.17 | -     | -     | -     | -     | -     | -     | -     | -     | -     | -     | -     | -     | -     | 4.56            |
| C-16           | -     | 24.32 | 45.63 | -     | -     | -     | -     | -     | -     | -     | -     | -     | -     | -     | -     | -     | 4.65            |
| C-17           | -     | 36.47 | 67.02 | -     | -     | -     | -     | -     | -     | -     | -     | -     | -     | -     | -     | -     | 4.65            |
| C-18           | -     | 48.75 | 100   | 50.84 | -     | -     | -     | -     | -     | -     | -     | -     | -     | -     | -     | -     | 5.01            |
| C-19           | -     | 25.91 | 51.25 | -     | -     | -     | -     | -     | -     | -     | -     | -     | -     | -     | -     | -     | 4.66            |
| C-20           | -     | 10.45 | 16.91 | 10.83 | -     | -     | -     | -     | -     | -     | -     | -     | -     | -     | -     | -     | 5.01            |
| C-21           | -     | 7.98  | 9.38  | -     | -     | -     | -     | -     | -     | -     | -     | -     | -     | -     | -     | -     | 4.54            |
| C-22           | -     | 8.13  | 8.02  | -     | -     | -     | -     | -     | -     | -     | -     | -     | -     | -     | -     | -     | 4.50            |
| C-23           | -     | 8.21  | 8.66  | -     | -     | -     | -     | -     | -     | -     | -     | -     | -     | -     | -     | -     | 4.51            |
| C-24           | -     | 6.99  | 5.78  | -     | -     | -     | -     | -     | -     | -     | -     | -     | -     | -     | -     | -     | 4.45            |
| C-25           | -     | 4.90  | -     | -     | -     | -     | -     | -     | -     | -     | -     | -     | -     | -     | -     | -     | 4.00            |
| C-26           | -     | -     | -     | -     | -     | -     | -     | -     | -     | -     | -     | -     | -     | -     | -     | -     | -               |
| C-27           | -     | -     | -     | -     | -     | -     | -     | -     | -     | -     | -     | -     | -     | -     | -     | -     | -               |
| C-28           | -     | -     | -     | -     | -     | -     | -     | -     | -     | -     | -     | -     | -     | -     | -     | -     | -               |
| C-29           | -     | -     | -     | -     | -     | -     | -     | -     | -     | -     | -     | -     | -     | -     | -     | -     | -               |
| C-30           | -     | -     | -     | -     | -     | -     | -     | -     | -     | -     | -     | -     | -     | -     | -     | -     | -               |
| n <sub>C</sub> | Cl-51 | Cl-52 | Cl-53 | Cl-54 | Cl-55 | Cl-56 | Cl-57 | Cl-58 | Cl-59 | Cl-60 | Cl-61 | Cl-62 | Cl-63 | Cl-64 | Cl-65 | Cl-66 |                 |
|                | -     | 18.49 | 18.04 | 18.35 | 14.00 | -     | -     | -     | -     | -     | -     | -     | -     | -     | -     | -     | -               |

**Table S6.** Proportions of very short- ( $\rho$ , vSC-), short- ( $\rho$ , SC-), medium- ( $\rho$ , MC-), long- ( $\rho$ , LC-) and very long-chain ( $\rho$ , vLC-) materials of chlorinated paraffins (CPs), mono- (COs), di-olefins (CdiOs) and tri-olefins (CtriOs). Sample P1 was evaluated by CP-Hunter and RASER, whereas samples P2 and P3 were evaluated by CP-Hunter.

| Name                              | Code | Chain-length                                     | Compound class proportion / % |       |       |       |
|-----------------------------------|------|--------------------------------------------------|-------------------------------|-------|-------|-------|
|                                   |      |                                                  | CP                            | CO    | CdiO  | CtriO |
| Sewage sludge<br>(By CP-Hunter)   | P1   | $\rho$ vSCCP (C <sub>9</sub> )                   | -                             | -     | -     | -     |
|                                   |      | $\rho$ SCCP (C <sub>10</sub> -C <sub>13</sub> )  | 20.93                         | 30.05 | 8.90  | -     |
|                                   |      | $\rho$ MCCP (C <sub>14</sub> -C <sub>17</sub> )  | 55.58                         | 56.27 | 60.61 | 33.00 |
|                                   |      | $\rho$ LCCP (C <sub>18</sub> -C <sub>21</sub> )  | 12.49                         | 10.62 | 27.95 | 58.16 |
|                                   |      | $\rho$ vLCCP (C <sub>22</sub> -C <sub>30</sub> ) | 11.01                         | 3.07  | 2.54  | 8.84  |
| Sewage sludge<br>(By RASER)       | P1   | $\rho$ vSCCP (C <sub>9</sub> )                   | -                             | -     | -     | -     |
|                                   |      | $\rho$ SCCP (C <sub>10</sub> -C <sub>13</sub> )  | 20.96                         | 30.87 | 8.61  | -     |
|                                   |      | $\rho$ MCCP (C <sub>14</sub> -C <sub>17</sub> )  | 55.62                         | 58.04 | 64.52 | 42.92 |
|                                   |      | $\rho$ LCCP (C <sub>18</sub> -C <sub>21</sub> )  | 12.48                         | 9.87  | 25.01 | 49.53 |
|                                   |      | $\rho$ vLCCP (C <sub>22</sub> -C <sub>30</sub> ) | 10.94                         | 1.22  | 1.86  | 7.55  |
| Yoga mat                          | P2   | $\rho$ vSCCP (C <sub>9</sub> )                   | -                             | -     | -     | -     |
|                                   |      | $\rho$ SCCP (C <sub>10</sub> -C <sub>13</sub> )  | 22.78                         | 16.47 | 7.15  | -     |
|                                   |      | $\rho$ MCCP (C <sub>14</sub> -C <sub>17</sub> )  | 74.82                         | 80.11 | 86.18 | 87.35 |
|                                   |      | $\rho$ LCCP (C <sub>18</sub> -C <sub>21</sub> )  | 2.40                          | 3.41  | 6.68  | 12.65 |
|                                   |      | $\rho$ vLCCP (C <sub>22</sub> -C <sub>30</sub> ) | -                             | -     | -     | -     |
| Coating of an<br>electronic cable | P3   | $\rho$ vSCCP (C <sub>9</sub> )                   | 0.06                          | -     | -     | -     |
|                                   |      | $\rho$ SCCP (C <sub>10</sub> -C <sub>13</sub> )  | 26.80                         | 14.58 | 3.72  | -     |
|                                   |      | $\rho$ MCCP (C <sub>14</sub> -C <sub>17</sub> )  | 52.60                         | 46.18 | 32.04 | 8.72  |
|                                   |      | $\rho$ LCCP (C <sub>18</sub> -C <sub>21</sub> )  | 13.75                         | 25.28 | 40.30 | 57.86 |
|                                   |      | $\rho$ vLCCP (C <sub>22</sub> -C <sub>30</sub> ) | 6.80                          | 13.97 | 23.94 | 33.42 |

**Table S7.** Proportions of CPs, COs, CdiOs and CtriOs compound classes per C-homologue (C<sub>10-30</sub>) in the sewage sludge (P1). Data were extracted and evaluated by CP-Hunter (top) and RASER (bottom). C-homologue with highest proportion of olefinic material is highlighted.

| Name                            | Code | C-homologue     | Compound class proportion / % |       |      |       |
|---------------------------------|------|-----------------|-------------------------------|-------|------|-------|
|                                 |      |                 | CP                            | CO    | CdiO | CtriO |
| Sewage sludge<br>(By CP-Hunter) | P1   | C <sub>10</sub> | 94.08                         | 5.92  | -    | -     |
|                                 |      | C <sub>11</sub> | 90.36                         | 9.51  | 0.13 | -     |
|                                 |      | C <sub>12</sub> | 87.15                         | 12.37 | 0.48 | -     |
|                                 |      | C <sub>13</sub> | 87.76                         | 11.49 | 0.75 | -     |
|                                 |      | C <sub>14</sub> | 92.53                         | 6.93  | 0.53 | -     |
|                                 |      | C <sub>15</sub> | 90.72                         | 8.21  | 1.00 | 0.07  |
|                                 |      | C <sub>16</sub> | 88.99                         | 9.02  | 1.79 | 0.21  |
|                                 |      | C <sub>17</sub> | 88.05                         | 8.90  | 2.53 | 0.53  |
|                                 |      | C <sub>18</sub> | 88.06                         | 7.94  | 2.87 | 1.13  |
|                                 |      | C <sub>19</sub> | 89.66                         | 6.36  | 2.73 | 1.26  |
|                                 |      | C <sub>20</sub> | 92.20                         | 4.56  | 1.89 | 1.35  |
|                                 |      | C <sub>21</sub> | 94.92                         | 3.48  | 1.04 | 0.56  |
|                                 |      | C <sub>22</sub> | 95.91                         | 2.78  | 0.85 | 0.46  |
|                                 |      | C <sub>23</sub> | 96.26                         | 2.26  | 0.72 | 0.76  |
|                                 |      | C <sub>24</sub> | 97.14                         | 2.14  | 0.45 | 0.27  |
|                                 |      | C <sub>25</sub> | 98.25                         | 1.75  | -    | -     |
|                                 |      | C <sub>26</sub> | 98.10                         | 1.90  | -    | -     |
|                                 |      | C <sub>27</sub> | 97.78                         | 2.22  | -    | -     |
|                                 |      | C <sub>28</sub> | 97.05                         | 2.95  | -    | -     |
|                                 |      | C <sub>29</sub> | 96.27                         | 3.73  | -    | -     |
|                                 |      | C <sub>30</sub> | 95.97                         | 4.03  | -    | -     |
| Sewage sludge<br>(By RASER)     | P1   | C <sub>10</sub> | 93.96                         | 6.04  | -    | -     |
|                                 |      | C <sub>11</sub> | 90.37                         | 9.56  | 0.07 | -     |
|                                 |      | C <sub>12</sub> | 87.03                         | 12.46 | 0.50 | -     |
|                                 |      | C <sub>13</sub> | 87.88                         | 11.45 | 0.67 | -     |
|                                 |      | C <sub>14</sub> | 92.44                         | 6.99  | 0.36 | 0.20  |
|                                 |      | C <sub>15</sub> | 90.62                         | 8.23  | 1.09 | 0.07  |
|                                 |      | C <sub>16</sub> | 88.70                         | 9.02  | 2.04 | 0.23  |
|                                 |      | C <sub>17</sub> | 87.92                         | 9.09  | 2.49 | 0.50  |
|                                 |      | C <sub>18</sub> | 88.52                         | 7.76  | 2.54 | 1.18  |
|                                 |      | C <sub>19</sub> | 91.09                         | 5.25  | 2.67 | 1.00  |
|                                 |      | C <sub>20</sub> | 93.75                         | 3.92  | 1.32 | 1.01  |
|                                 |      | C <sub>21</sub> | 96.72                         | 2.34  | 0.32 | 0.62  |
|                                 |      | C <sub>22</sub> | 96.90                         | 1.84  | 0.75 | 0.50  |
|                                 |      | C <sub>23</sub> | 97.43                         | 1.48  | 0.64 | 0.45  |
|                                 |      | C <sub>24</sub> | 98.39                         | 1.29  | -    | 0.31  |
|                                 |      | C <sub>25</sub> | 98.60                         | 1.17  | 0.10 | 0.13  |
|                                 |      | C <sub>26</sub> | 99.45                         | 0.55  | -    | -     |
|                                 |      | C <sub>27</sub> | 99.59                         | 0.41  | -    | -     |
|                                 |      | C <sub>28</sub> | 100                           | -     | -    | -     |
|                                 |      | C <sub>29</sub> | 100                           | -     | -    | -     |
|                                 |      | C <sub>30</sub> | 100                           | -     | -    | -     |

**Table S8.** Proportions of CPs, COs, CdiOs and CtriOs compound classes per C-homologue (C<sub>10-30</sub>) in P2 and P3.

Data were extracted and evaluated with CP-Hunter. C-homologue with highest proportion of olefinic material is highlighted.

| Name                           | Code | C-homologue     | Compound class proportion / % |       |      |       |
|--------------------------------|------|-----------------|-------------------------------|-------|------|-------|
|                                |      |                 | CP                            | CO    | CdiO | CtriO |
| Yoga mat                       | P2   | C <sub>10</sub> | 100                           | -     | -    | -     |
|                                |      | C <sub>11</sub> | 97.73                         | 2.27  | -    | -     |
|                                |      | C <sub>12</sub> | 95.09                         | 4.87  | 0.05 | -     |
|                                |      | C <sub>13</sub> | 93.88                         | 5.79  | 0.33 | -     |
|                                |      | C <sub>14</sub> | 92.23                         | 7.08  | 0.67 | 0.02  |
|                                |      | C <sub>15</sub> | 90.35                         | 8.45  | 1.09 | 0.10  |
|                                |      | C <sub>16</sub> | 88.23                         | 9.87  | 1.66 | 0.24  |
|                                |      | C <sub>17</sub> | 86.61                         | 10.66 | 2.27 | 0.46  |
|                                |      | C <sub>18</sub> | 86.18                         | 10.74 | 2.52 | 0.56  |
|                                |      | C <sub>19</sub> | 88.56                         | 9.39  | 2.05 | -     |
|                                |      | C <sub>20</sub> | 100                           | -     | -    | -     |
|                                |      | C <sub>21</sub> | -                             | -     | -    | -     |
|                                |      | C <sub>22</sub> | -                             | -     | -    | -     |
|                                |      | C <sub>23</sub> | -                             | -     | -    | -     |
|                                |      | C <sub>24</sub> | -                             | -     | -    | -     |
|                                |      | C <sub>25</sub> | -                             | -     | -    | -     |
|                                |      | C <sub>26</sub> | -                             | -     | -    | -     |
|                                |      | C <sub>27</sub> | -                             | -     | -    | -     |
|                                |      | C <sub>28</sub> | -                             | -     | -    | -     |
|                                |      | C <sub>29</sub> | -                             | -     | -    | -     |
|                                |      | C <sub>30</sub> | -                             | -     | -    | -     |
| Coating of an electronic cable | P3   | C <sub>10</sub> | 97.15                         | 2.85  | -    | -     |
|                                |      | C <sub>11</sub> | 96.17                         | 3.83  | -    | -     |
|                                |      | C <sub>12</sub> | 94.83                         | 5.10  | 0.07 | -     |
|                                |      | C <sub>13</sub> | 93.18                         | 6.47  | 0.35 | -     |
|                                |      | C <sub>14</sub> | 91.43                         | 7.82  | 0.74 | 0.02  |
|                                |      | C <sub>15</sub> | 89.15                         | 9.68  | 1.12 | 0.04  |
|                                |      | C <sub>16</sub> | 86.79                         | 11.38 | 1.75 | 0.08  |
|                                |      | C <sub>17</sub> | 84.59                         | 12.79 | 2.41 | 0.21  |
|                                |      | C <sub>18</sub> | 81.40                         | 15.07 | 3.18 | 0.35  |
|                                |      | C <sub>19</sub> | 78.11                         | 16.80 | 4.31 | 0.78  |
|                                |      | C <sub>20</sub> | 76.96                         | 17.11 | 4.76 | 1.17  |
|                                |      | C <sub>21</sub> | 77.62                         | 16.00 | 4.91 | 1.47  |
|                                |      | C <sub>22</sub> | 77.87                         | 15.84 | 4.82 | 1.47  |
|                                |      | C <sub>23</sub> | 76.44                         | 17.31 | 5.06 | 1.19  |
|                                |      | C <sub>24</sub> | 72.54                         | 20.60 | 6.20 | 0.66  |
|                                |      | C <sub>25</sub> | 70.34                         | 23.65 | 6.00 | -     |
|                                |      | C <sub>26</sub> | 71.94                         | 24.80 | 3.25 | -     |
|                                |      | C <sub>27</sub> | 81.00                         | 19.00 | -    | -     |
|                                |      | C <sub>28</sub> | 100                           | -     | -    | -     |
|                                |      | C <sub>29</sub> | -                             | -     | -    | -     |
|                                |      | C <sub>30</sub> | -                             | -     | -    | -     |

**Table S9.** Distributions of Cl-homologues (%) per carbon-chain length of CPs, COs, CdiOs and CtriOs compound classes in the sewage sludge (P1). Data were evaluated by CP-Hunter. Highlighted are the most abundant Cl-homologues per chain length.

Distribution of Cl-homologues per carbon-chain length (%)

Compound class: Chlorinated paraffin (CP)

Sample: Sewage sludge

Code: P1

|      | Cl-3 | Cl-4 | Cl-5  | Cl-6         | Cl-7         | Cl-8         | Cl-9  | Cl-10 | Cl-11 | Cl-12 | Cl-13 | Cl-14 | Cl-15 | Cl-16 | Cl-17 | Cl-18 |      |
|------|------|------|-------|--------------|--------------|--------------|-------|-------|-------|-------|-------|-------|-------|-------|-------|-------|------|
| C-9  | -    | -    | -     | -            | -            | -            | -     | -     | -     | -     | -     | -     | -     | -     | -     | -     | C-9  |
| C-10 | -    | 0.57 | 14.69 | <b>42.31</b> | 32.79        | 9.05         | 0.60  | -     | -     | -     | -     | -     | -     | -     | -     | -     | C-10 |
| C-11 | -    | 0.53 | 9.41  | 33.02        | <b>38.02</b> | 15.51        | 3.17  | 0.35  | -     | -     | -     | -     | -     | -     | -     | -     | C-11 |
| C-12 | -    | 0.85 | 9.05  | 24.43        | <b>34.36</b> | 23.05        | 6.92  | 1.24  | 0.10  | -     | -     | -     | -     | -     | -     | -     | C-12 |
| C-13 | -    | 2.96 | 17.89 | <b>26.38</b> | 24.37        | 17.57        | 8.54  | 2.06  | 0.23  | -     | -     | -     | -     | -     | -     | -     | C-13 |
| C-14 | 0.03 | 5.81 | 27.98 | <b>34.98</b> | 22.08        | 7.03         | 1.71  | 0.36  | 0.02  | -     | -     | -     | -     | -     | -     | -     | C-14 |
| C-15 | 0.06 | 5.82 | 26.46 | <b>32.71</b> | 23.19        | 9.19         | 2.18  | 0.39  | -     | -     | -     | -     | -     | -     | -     | -     | C-15 |
| C-16 | 0.07 | 5.36 | 22.57 | <b>30.27</b> | 24.34        | 12.65        | 3.89  | 0.77  | 0.08  | -     | -     | -     | -     | -     | -     | -     | C-16 |
| C-17 | 0.08 | 4.75 | 18.01 | <b>28.01</b> | 25.11        | 15.86        | 6.44  | 1.53  | 0.22  | -     | -     | -     | -     | -     | -     | -     | C-17 |
| C-18 | 0.10 | 3.91 | 13.39 | 20.64        | <b>24.64</b> | 20.34        | 11.91 | 4.28  | 0.78  | -     | -     | -     | -     | -     | -     | -     | C-18 |
| C-19 | 0.16 | 4.02 | 11.99 | 18.69        | <b>22.56</b> | 21.11        | 13.82 | 6.11  | 1.45  | 0.09  | -     | -     | -     | -     | -     | -     | C-19 |
| C-20 | 0.30 | 4.99 | 12.20 | 18.89        | <b>22.36</b> | 20.41        | 12.78 | 5.87  | 1.93  | 0.28  | -     | -     | -     | -     | -     | -     | C-20 |
| C-21 | 1.02 | 6.06 | 12.47 | 19.61        | <b>22.55</b> | 19.29        | 12.36 | 4.75  | 1.50  | 0.37  | -     | -     | -     | -     | -     | -     | C-21 |
| C-22 | 0.65 | 6.44 | 12.73 | 19.19        | <b>23.13</b> | 18.48        | 11.82 | 4.67  | 1.82  | 1.05  | -     | -     | -     | -     | -     | -     | C-22 |
| C-23 | 0.64 | 5.50 | 12.40 | 19.10        | <b>22.78</b> | 19.60        | 11.82 | 5.06  | 2.12  | 0.73  | 0.24  | -     | -     | -     | -     | -     | C-23 |
| C-24 | 0.63 | 4.53 | 10.50 | 18.54        | <b>22.45</b> | 20.76        | 12.25 | 6.17  | 2.54  | 0.94  | 0.68  | -     | -     | -     | -     | -     | C-24 |
| C-25 | 2.00 | 4.09 | 8.89  | 16.62        | <b>23.49</b> | 20.38        | 13.24 | 6.95  | 2.90  | 1.12  | 0.32  | -     | -     | -     | -     | -     | C-25 |
| C-26 | 0.61 | 4.13 | 8.26  | 14.66        | <b>21.54</b> | 21.20        | 15.33 | 8.23  | 3.70  | 1.45  | 0.43  | 0.47  | -     | -     | -     | -     | C-26 |
| C-27 | 0.57 | 4.26 | 8.28  | 13.33        | 19.81        | <b>20.29</b> | 16.89 | 9.73  | 4.60  | 1.72  | 0.53  | -     | -     | -     | -     | -     | C-27 |
| C-28 | 0.98 | 4.11 | 8.23  | 12.95        | 17.62        | <b>19.72</b> | 17.29 | 10.86 | 5.57  | 2.08  | 0.58  | -     | -     | -     | -     | -     | C-28 |
| C-29 | 1.05 | 4.49 | 8.18  | 12.63        | 16.53        | <b>19.16</b> | 16.78 | 11.98 | 6.14  | 2.42  | 0.64  | -     | -     | -     | -     | -     | C-29 |
| C-30 | 1.07 | 4.76 | 8.17  | 12.18        | 15.49        | <b>18.25</b> | 16.80 | 12.92 | 6.94  | 2.73  | 0.69  | -     | -     | -     | -     | -     | C-30 |
|      | Cl-3 | Cl-4 | Cl-5  | Cl-6         | Cl-7         | Cl-8         | Cl-9  | Cl-10 | Cl-11 | Cl-12 | Cl-13 | Cl-14 | Cl-15 | Cl-16 | Cl-17 | Cl-18 |      |

Distribution of Cl-homologues per carbon-chain length (%)

Compound class: Chlorinated olefin (CO)

Sample: Sewage sludge

Code: P1

|      | Cl-3 | Cl-4  | Cl-5         | Cl-6         | Cl-7         | Cl-8         | Cl-9  | Cl-10 | Cl-11 | Cl-12 | Cl-13 | Cl-14 | Cl-15 | Cl-16 | Cl-17 | Cl-18 |      |
|------|------|-------|--------------|--------------|--------------|--------------|-------|-------|-------|-------|-------|-------|-------|-------|-------|-------|------|
| C-9  | -    | -     | -            | -            | -            | -            | -     | -     | -     | -     | -     | -     | -     | -     | -     | -     | C-9  |
| C-10 | -    | -     | 33.16        | <b>52.09</b> | 14.75        | -            | -     | -     | -     | -     | -     | -     | -     | -     | -     | -     | C-10 |
| C-11 | -    | 0.74  | 18.16        | <b>47.31</b> | 27.81        | 5.98         | -     | -     | -     | -     | -     | -     | -     | -     | -     | -     | C-11 |
| C-12 | -    | 0.68  | 12.10        | <b>40.56</b> | 33.60        | 11.66        | 1.40  | -     | -     | -     | -     | -     | -     | -     | -     | -     | C-12 |
| C-13 | -    | 2.10  | 12.95        | 30.57        | <b>34.85</b> | 16.38        | 3.15  | -     | -     | -     | -     | -     | -     | -     | -     | -     | C-13 |
| C-14 | -    | 9.04  | <b>34.97</b> | 33.94        | 17.24        | 4.38         | 0.43  | -     | -     | -     | -     | -     | -     | -     | -     | -     | C-14 |
| C-15 | -    | 9.56  | <b>35.26</b> | 34.28        | 16.77        | 3.70         | 0.43  | -     | -     | -     | -     | -     | -     | -     | -     | -     | C-15 |
| C-16 | -    | 9.11  | 31.25        | <b>34.39</b> | 18.49        | 5.96         | 0.80  | -     | -     | -     | -     | -     | -     | -     | -     | -     | C-16 |
| C-17 | -    | 9.33  | 26.99        | <b>33.67</b> | 21.05        | 7.54         | 1.42  | -     | -     | -     | -     | -     | -     | -     | -     | -     | C-17 |
| C-18 | -    | 7.67  | 21.61        | <b>28.91</b> | 24.87        | 12.99        | 3.94  | -     | -     | -     | -     | -     | -     | -     | -     | -     | C-18 |
| C-19 | -    | 7.94  | 21.09        | 26.23        | <b>26.25</b> | 14.94        | 3.55  | -     | -     | -     | -     | -     | -     | -     | -     | -     | C-19 |
| C-20 | -    | 9.59  | 21.94        | <b>27.29</b> | 23.79        | 13.47        | 3.92  | -     | -     | -     | -     | -     | -     | -     | -     | -     | C-20 |
| C-21 | -    | 12.27 | 22.01        | <b>29.54</b> | 23.52        | 12.65        | -     | -     | -     | -     | -     | -     | -     | -     | -     | -     | C-21 |
| C-22 | -    | 13.53 | 21.12        | <b>30.69</b> | 25.91        | 8.75         | -     | -     | -     | -     | -     | -     | -     | -     | -     | -     | C-22 |
| C-23 | -    | 10.41 | 22.20        | <b>30.62</b> | 26.37        | 10.40        | -     | -     | -     | -     | -     | -     | -     | -     | -     | -     | C-23 |
| C-24 | -    | 10.02 | 19.42        | <b>33.70</b> | 24.06        | 12.79        | -     | -     | -     | -     | -     | -     | -     | -     | -     | -     | C-24 |
| C-25 | -    | 8.56  | 21.37        | <b>33.25</b> | 26.90        | 9.92         | -     | -     | -     | -     | -     | -     | -     | -     | -     | -     | C-25 |
| C-26 | -    | -     | 18.71        | 30.94        | <b>31.32</b> | 9.33         | 9.71  | -     | -     | -     | -     | -     | -     | -     | -     | -     | C-26 |
| C-27 | -    | -     | 17.47        | 25.42        | <b>31.54</b> | 9.83         | 15.74 | -     | -     | -     | -     | -     | -     | -     | -     | -     | C-27 |
| C-28 | -    | -     | 12.04        | 24.14        | <b>25.02</b> | 20.31        | 18.50 | -     | -     | -     | -     | -     | -     | -     | -     | -     | C-28 |
| C-29 | -    | -     | 8.67         | 20.06        | 25.02        | <b>28.18</b> | 18.08 | -     | -     | -     | -     | -     | -     | -     | -     | -     | C-29 |
| C-30 | -    | -     | -            | 17.27        | <b>27.26</b> | 27.11        | 28.36 | -     | -     | -     | -     | -     | -     | -     | -     | -     | C-30 |
|      | Cl-3 | Cl-4  | Cl-5         | Cl-6         | Cl-7         | Cl-8         | Cl-9  | Cl-10 | Cl-11 | Cl-12 | Cl-13 | Cl-14 | Cl-15 | Cl-16 | Cl-17 | Cl-18 |      |

Distribution of Cl-homologues per carbon-chain length (%)

Compound class: Chlorinated diolefin (CdiO)

Sample: Sewage sludge

Code: P1

|      | Cl-3 | Cl-4  | Cl-5         | Cl-6         | Cl-7  | Cl-8 | Cl-9 | Cl-10 | Cl-11 | Cl-12 | Cl-13 | Cl-14 | Cl-15 | Cl-16 | Cl-17 | Cl-18 |      |
|------|------|-------|--------------|--------------|-------|------|------|-------|-------|-------|-------|-------|-------|-------|-------|-------|------|
| C-9  | -    | -     | -            | -            | -     | -    | -    | -     | -     | -     | -     | -     | -     | -     | -     | -     | C-9  |
| C-10 | -    | -     | -            | -            | -     | -    | -    | -     | -     | -     | -     | -     | -     | -     | -     | -     | C-10 |
| C-11 | -    | -     | 41.36        | <b>58.64</b> | -     | -    | -    | -     | -     | -     | -     | -     | -     | -     | -     | -     | C-11 |
| C-12 | -    | -     | 39.39        | <b>54.60</b> | 6.01  | -    | -    | -     | -     | -     | -     | -     | -     | -     | -     | -     | C-12 |
| C-13 | -    | -     | 32.46        | <b>52.22</b> | 15.33 | -    | -    | -     | -     | -     | -     | -     | -     | -     | -     | -     | C-13 |
| C-14 | -    | 18.14 | <b>53.54</b> | 28.32        | -     | -    | -    | -     | -     | -     | -     | -     | -     | -     | -     | -     | C-14 |
| C-15 | -    | 19.86 | <b>54.60</b> | 25.54        | -     | -    | -    | -     | -     | -     | -     | -     | -     | -     | -     | -     | C-15 |
| C-16 | -    | 19.37 | <b>48.45</b> | 29.66        | 2.52  | -    | -    | -     | -     | -     | -     | -     | -     | -     | -     | -     | C-16 |
| C-17 | -    | 17.27 | <b>43.43</b> | 32.64        | 6.66  | -    | -    | -     | -     | -     | -     | -     | -     | -     | -     | -     | C-17 |
| C-18 | -    | 3.31  | <b>41.05</b> | 39.61        | 16.03 | -    | -    | -     | -     | -     | -     | -     | -     | -     | -     | -     | C-18 |
| C-19 | -    | 15.54 | <b>37.14</b> | 33.43        | 13.89 | -    | -    | -     | -     | -     | -     | -     | -     | -     | -     | -     | C-19 |
| C-20 | -    | 18.66 | <b>40.90</b> | 31.87        | 8.57  | -    | -    | -     | -     | -     | -     | -     | -     | -     | -     | -     | C-20 |
| C-21 | -    | 28.93 | <b>35.25</b> | 35.82        | -     | -    | -    | -     | -     | -     | -     | -     | -     | -     | -     | -     | C-21 |
| C-22 | -    | 25.20 | <b>46.01</b> | 28.78        | -     | -    | -    | -     | -     | -     | -     | -     | -     | -     | -     | -     | C-22 |
| C-23 | -    | 33.12 | <b>42.57</b> | 24.31        | -     | -    | -    | -     | -     | -     | -     | -     | -     | -     | -     | -     | C-23 |
| C-24 | -    | 33.99 | <b>41.96</b> | 24.05        | -     | -    | -    | -     | -     | -     | -     | -     | -     | -     | -     | -     | C-24 |
| C-25 | -    | -     | -            | -            | -     | -    | -    | -     | -     | -     | -     | -     | -     | -     | -     | -     | C-25 |
| C-26 | -    | -     | -            | -            | -     | -    | -    | -     | -     | -     | -     | -     | -     | -     | -     | -     | C-26 |
| C-27 | -    | -     | -            | -            | -     | -    | -    | -     | -     | -     | -     | -     | -     | -     | -     | -     | C-27 |
| C-28 | -    | -     | -            | -            | -     | -    | -    | -     | -     | -     | -     | -     | -     | -     | -     | -     | C-28 |
| C-29 | -    | -     | -            | -            | -     | -    | -    | -     | -     | -     | -     | -     | -     | -     | -     | -     | C-29 |
| C-30 | -    | -     | -            | -            | -     | -    | -    | -     | -     | -     | -     | -     | -     | -     | -     | -     | C-30 |

Distribution of Cl-homologues per carbon-chain length (%)

Compound class: Chlorinated triolefin (CtrIO)

Sample: Sewage sludge

Code: P1

|      | Cl-3 | Cl-4         | Cl-5         | Cl-6  | Cl-7  | Cl-8 | Cl-9 | Cl-10 | Cl-11 | Cl-12 | Cl-13 | Cl-14 | Cl-15 | Cl-16 | Cl-17 | Cl-18 |      |
|------|------|--------------|--------------|-------|-------|------|------|-------|-------|-------|-------|-------|-------|-------|-------|-------|------|
| C-9  | -    | -            | -            | -     | -     | -    | -    | -     | -     | -     | -     | -     | -     | -     | -     | -     | C-9  |
| C-10 | -    | -            | -            | -     | -     | -    | -    | -     | -     | -     | -     | -     | -     | -     | -     | -     | C-10 |
| C-11 | -    | -            | -            | -     | -     | -    | -    | -     | -     | -     | -     | -     | -     | -     | -     | -     | C-11 |
| C-12 | -    | -            | -            | -     | -     | -    | -    | -     | -     | -     | -     | -     | -     | -     | -     | -     | C-12 |
| C-13 | -    | -            | -            | -     | -     | -    | -    | -     | -     | -     | -     | -     | -     | -     | -     | -     | C-13 |
| C-14 | -    | -            | -            | -     | -     | -    | -    | -     | -     | -     | -     | -     | -     | -     | -     | -     | C-14 |
| C-15 | -    | 43.08        | <b>56.92</b> | -     | -     | -    | -    | -     | -     | -     | -     | -     | -     | -     | -     | -     | C-15 |
| C-16 | -    | 37.98        | <b>62.02</b> | -     | -     | -    | -    | -     | -     | -     | -     | -     | -     | -     | -     | -     | C-16 |
| C-17 | -    | 32.11        | <b>53.21</b> | 14.67 | -     | -    | -    | -     | -     | -     | -     | -     | -     | -     | -     | -     | C-17 |
| C-18 | -    | 25.13        | <b>49.46</b> | 25.41 | -     | -    | -    | -     | -     | -     | -     | -     | -     | -     | -     | -     | C-18 |
| C-19 | -    | 24.69        | <b>48.25</b> | 27.06 | -     | -    | -    | -     | -     | -     | -     | -     | -     | -     | -     | -     | C-19 |
| C-20 | -    | 19.30        | <b>55.44</b> | 14.91 | 10.35 | -    | -    | -     | -     | -     | -     | -     | -     | -     | -     | -     | C-20 |
| C-21 | -    | 48.98        | <b>51.02</b> | -     | -     | -    | -    | -     | -     | -     | -     | -     | -     | -     | -     | -     | C-21 |
| C-22 | -    | <b>53.42</b> | 46.58        | -     | -     | -    | -    | -     | -     | -     | -     | -     | -     | -     | -     | -     | C-22 |
| C-23 | -    | <b>27.69</b> | 26.05        | 46.26 | -     | -    | -    | -     | -     | -     | -     | -     | -     | -     | -     | -     | C-23 |
| C-24 | -    | <b>54.55</b> | 45.45        | -     | -     | -    | -    | -     | -     | -     | -     | -     | -     | -     | -     | -     | C-24 |
| C-25 | -    | -            | -            | -     | -     | -    | -    | -     | -     | -     | -     | -     | -     | -     | -     | -     | C-25 |
| C-26 | -    | -            | -            | -     | -     | -    | -    | -     | -     | -     | -     | -     | -     | -     | -     | -     | C-26 |
| C-27 | -    | -            | -            | -     | -     | -    | -    | -     | -     | -     | -     | -     | -     | -     | -     | -     | C-27 |
| C-28 | -    | -            | -            | -     | -     | -    | -    | -     | -     | -     | -     | -     | -     | -     | -     | -     | C-28 |
| C-29 | -    | -            | -            | -     | -     | -    | -    | -     | -     | -     | -     | -     | -     | -     | -     | -     | C-29 |
| C-30 | -    | -            | -            | -     | -     | -    | -    | -     | -     | -     | -     | -     | -     | -     | -     | -     | C-30 |

**Table S10.** Distributions of Cl-homologues (%) per carbon-chain length of CPs, COs, CdiOs and CtriOs compound classes in the sewage sludge (P1). Data were evaluated by RASER. Highlighted are the most abundant Cl-homologues per chain length.

Distribution of Cl-homologues per carbon-chain length (%)

Compound class: Chlorinated paraffin (CP)

Sample: Sewage sludge

Code: P1

|      | Cl-3 | Cl-4 | Cl-5  | Cl-6         | Cl-7         | Cl-8         | Cl-9  | Cl-10 | Cl-11 | Cl-12 | Cl-13 | Cl-14 | Cl-15 | Cl-16 | Cl-17 | Cl-18 |      |
|------|------|------|-------|--------------|--------------|--------------|-------|-------|-------|-------|-------|-------|-------|-------|-------|-------|------|
| C-9  | -    | -    | -     | -            | -            | -            | -     | -     | -     | -     | -     | -     | -     | -     | -     | -     | C-9  |
| C-10 | -    | -    | 14.64 | <b>42.06</b> | 33.27        | 9.33         | 0.69  | -     | -     | -     | -     | -     | -     | -     | -     | -     | C-10 |
| C-11 | -    | 0.54 | 9.38  | 32.72        | <b>37.91</b> | 15.82        | 3.25  | 0.38  | -     | -     | -     | -     | -     | -     | -     | -     | C-11 |
| C-12 | -    | 0.86 | 9.07  | 24.26        | <b>34.27</b> | 23.23        | 6.93  | 1.28  | 0.10  | -     | -     | -     | -     | -     | -     | -     | C-12 |
| C-13 | -    | 2.96 | 17.84 | <b>26.23</b> | 24.45        | 17.60        | 8.55  | 2.11  | 0.25  | -     | -     | -     | -     | -     | -     | -     | C-13 |
| C-14 | -    | 5.84 | 28.21 | <b>34.63</b> | 22.15        | 7.03         | 0.38  | 0.03  | -     | -     | -     | -     | -     | -     | -     | -     | C-14 |
| C-15 | 0.05 | 5.89 | 26.31 | <b>32.65</b> | 23.37        | 9.14         | 2.19  | 0.40  | -     | -     | -     | -     | -     | -     | -     | -     | C-15 |
| C-16 | 0.07 | 5.40 | 22.48 | <b>30.01</b> | 24.55        | 12.78        | 3.92  | 0.77  | -     | -     | -     | -     | -     | -     | -     | -     | C-16 |
| C-17 | -    | 4.77 | 18.11 | <b>27.77</b> | 25.15        | 16.14        | 6.51  | 1.55  | -     | -     | -     | -     | -     | -     | -     | -     | C-17 |
| C-18 | 0.11 | 3.95 | 13.68 | 20.39        | <b>24.82</b> | 20.08        | 11.96 | 4.22  | 0.81  | -     | -     | -     | -     | -     | -     | -     | C-18 |
| C-19 | 0.16 | 4.04 | 12.09 | 18.43        | <b>22.56</b> | 21.10        | 13.92 | 6.05  | 1.50  | 0.15  | -     | -     | -     | -     | -     | -     | C-19 |
| C-20 | 0.32 | 5.03 | 12.26 | 18.99        | <b>22.36</b> | 19.95        | 12.83 | 5.79  | 2.46  | -     | -     | -     | -     | -     | -     | -     | C-20 |
| C-21 | -    | 6.15 | 12.62 | 19.58        | <b>22.32</b> | 19.18        | 12.49 | 5.25  | 1.94  | 0.47  | -     | -     | -     | -     | -     | -     | C-21 |
| C-22 | 0.66 | 6.60 | 13.02 | 19.36        | <b>23.21</b> | 18.14        | 11.90 | 5.17  | 1.93  | -     | -     | -     | -     | -     | -     | -     | C-22 |
| C-23 | 0.64 | 5.43 | 12.56 | 18.85        | <b>22.39</b> | 19.41        | 11.81 | 5.53  | 2.24  | 0.83  | 0.31  | -     | -     | -     | -     | -     | C-23 |
| C-24 | 0.61 | 4.62 | 10.50 | 18.41        | <b>21.84</b> | 20.52        | 12.68 | 6.36  | 2.60  | 1.07  | 0.79  | -     | -     | -     | -     | -     | C-24 |
| C-25 | -    | 4.21 | 9.17  | 16.67        | <b>23.57</b> | 20.63        | 13.88 | 7.14  | 3.03  | 1.27  | 0.43  | -     | -     | -     | -     | -     | C-25 |
| C-26 | 0.62 | 4.17 | 8.36  | 14.35        | 20.77        | <b>21.14</b> | 15.84 | 8.25  | 3.78  | 1.58  | 0.57  | 0.57  | -     | -     | -     | -     | C-26 |
| C-27 | -    | 4.33 | 8.24  | 13.06        | 19.10        | <b>20.74</b> | 17.44 | 9.77  | 4.75  | 1.87  | 0.70  | -     | -     | -     | -     | -     | C-27 |
| C-28 | -    | 4.23 | 8.33  | 12.67        | 17.40        | <b>20.18</b> | 18.01 | 11.06 | 5.75  | 2.36  | -     | -     | -     | -     | -     | -     | C-28 |
| C-29 | 1.11 | 4.39 | 8.34  | 11.92        | 16.28        | <b>19.45</b> | 17.01 | 11.67 | 6.27  | 2.68  | 0.87  | -     | -     | -     | -     | -     | C-29 |
| C-30 | -    | 4.81 | 8.20  | 11.87        | 15.67        | <b>18.75</b> | 17.28 | 12.85 | 7.30  | 3.27  | -     | -     | -     | -     | -     | -     | C-30 |

Distribution of Cl-homologues per carbon-chain length (%)

Compound class: Chlorinated olefin (CO)

Sample: Sewage sludge

Code: P1

|      | Cl-3 | Cl-4  | Cl-5         | Cl-6         | Cl-7         | Cl-8  | Cl-9 | Cl-10 | Cl-11 | Cl-12 | Cl-13 | Cl-14 | Cl-15 | Cl-16 | Cl-17 | Cl-18 |      |
|------|------|-------|--------------|--------------|--------------|-------|------|-------|-------|-------|-------|-------|-------|-------|-------|-------|------|
| C-9  | -    | -     | -            | -            | -            | -     | -    | -     | -     | -     | -     | -     | -     | -     | -     | -     | C-9  |
| C-10 | -    | -     | 33.02        | <b>51.75</b> | 15.22        | -     | -    | -     | -     | -     | -     | -     | -     | -     | -     | -     | C-10 |
| C-11 | -    | -     | 18.38        | <b>47.13</b> | 28.15        | 6.33  | -    | -     | -     | -     | -     | -     | -     | -     | -     | -     | C-11 |
| C-12 | -    | 0.67  | 11.98        | <b>40.73</b> | 33.18        | 11.89 | 1.55 | -     | -     | -     | -     | -     | -     | -     | -     | -     | C-12 |
| C-13 | -    | 2.06  | 13.19        | 29.85        | <b>34.93</b> | 16.50 | 3.47 | -     | -     | -     | -     | -     | -     | -     | -     | -     | C-13 |
| C-14 | -    | 8.86  | <b>35.55</b> | 33.47        | 17.53        | 4.59  | -    | -     | -     | -     | -     | -     | -     | -     | -     | -     | C-14 |
| C-15 | -    | 9.34  | <b>35.35</b> | 33.96        | 17.03        | 3.85  | 0.47 | -     | -     | -     | -     | -     | -     | -     | -     | -     | C-15 |
| C-16 | -    | 8.90  | 31.54        | <b>34.08</b> | 18.38        | 6.24  | 0.86 | -     | -     | -     | -     | -     | -     | -     | -     | -     | C-16 |
| C-17 | -    | 9.26  | 26.94        | <b>33.62</b> | 20.81        | 7.86  | 1.50 | -     | -     | -     | -     | -     | -     | -     | -     | -     | C-17 |
| C-18 | -    | 8.08  | 22.46        | <b>29.84</b> | 25.71        | 13.91 | -    | -     | -     | -     | -     | -     | -     | -     | -     | -     | C-18 |
| C-19 | -    | 10.01 | 26.26        | <b>32.25</b> | 31.48        | -     | -    | -     | -     | -     | -     | -     | -     | -     | -     | -     | C-19 |
| C-20 | -    | 11.96 | 26.75        | <b>32.26</b> | 29.03        | -     | -    | -     | -     | -     | -     | -     | -     | -     | -     | -     | C-20 |
| C-21 | -    | 19.65 | 34.86        | <b>45.49</b> | -            | -     | -    | -     | -     | -     | -     | -     | -     | -     | -     | -     | C-21 |
| C-22 | -    | 22.01 | 34.56        | <b>43.44</b> | -            | -     | -    | -     | -     | -     | -     | -     | -     | -     | -     | -     | C-22 |
| C-23 | -    | 18.24 | 37.04        | <b>44.71</b> | -            | -     | -    | -     | -     | -     | -     | -     | -     | -     | -     | -     | C-23 |
| C-24 | -    | 17.41 | 35.19        | <b>47.40</b> | -            | -     | -    | -     | -     | -     | -     | -     | -     | -     | -     | -     | C-24 |
| C-25 | -    | 15.64 | 36.04        | <b>48.31</b> | -            | -     | -    | -     | -     | -     | -     | -     | -     | -     | -     | -     | C-25 |
| C-26 | -    | 27.63 | <b>72.37</b> | -            | -            | -     | -    | -     | -     | -     | -     | -     | -     | -     | -     | -     | C-26 |
| C-27 | -    | -     | <b>100</b>   | -            | -            | -     | -    | -     | -     | -     | -     | -     | -     | -     | -     | -     | C-27 |
| C-28 | -    | -     | -            | -            | -            | -     | -    | -     | -     | -     | -     | -     | -     | -     | -     | -     | C-28 |
| C-29 | -    | -     | -            | -            | -            | -     | -    | -     | -     | -     | -     | -     | -     | -     | -     | -     | C-29 |
| C-30 | -    | -     | -            | -            | -            | -     | -    | -     | -     | -     | -     | -     | -     | -     | -     | -     | C-30 |

Distribution of Cl-homologues per carbon-chain length (%)

Compound class: Chlorinated diolefin (CdiO)

Sample: Sewage sludge

Code: P1

|      | Cl-3 | Cl-4  | Cl-5  | Cl-6  | Cl-7 | Cl-8 | Cl-9 | Cl-10 | Cl-11 | Cl-12 | Cl-13 | Cl-14 | Cl-15 | Cl-16 | Cl-17 | Cl-18 |      |
|------|------|-------|-------|-------|------|------|------|-------|-------|-------|-------|-------|-------|-------|-------|-------|------|
| C-9  | -    | -     | -     | -     | -    | -    | -    | -     | -     | -     | -     | -     | -     | -     | -     | -     | C-9  |
| C-10 | -    | -     | -     | -     | -    | -    | -    | -     | -     | -     | -     | -     | -     | -     | -     | -     | C-10 |
| C-11 | -    | -     | 100   | -     | -    | -    | -    | -     | -     | -     | -     | -     | -     | -     | -     | -     | C-11 |
| C-12 | -    | -     | 44.30 | 55.70 | -    | -    | -    | -     | -     | -     | -     | -     | -     | -     | -     | -     | C-12 |
| C-13 | -    | -     | 35.30 | 64.70 | -    | -    | -    | -     | -     | -     | -     | -     | -     | -     | -     | -     | C-13 |
| C-14 | -    | 28.28 | 71.72 | -     | -    | -    | -    | -     | -     | -     | -     | -     | -     | -     | -     | -     | C-14 |
| C-15 | -    | 19.13 | 54.73 | 26.13 | -    | -    | -    | -     | -     | -     | -     | -     | -     | -     | -     | -     | C-15 |
| C-16 | -    | 17.45 | 52.73 | 29.82 | -    | -    | -    | -     | -     | -     | -     | -     | -     | -     | -     | -     | C-16 |
| C-17 | -    | 18.32 | 44.79 | 36.89 | -    | -    | -    | -     | -     | -     | -     | -     | -     | -     | -     | -     | C-17 |
| C-18 | -    | -     | 52.63 | 47.37 | -    | -    | -    | -     | -     | -     | -     | -     | -     | -     | -     | -     | C-18 |
| C-19 | -    | 16.89 | 44.91 | 38.20 | -    | -    | -    | -     | -     | -     | -     | -     | -     | -     | -     | -     | C-19 |
| C-20 | -    | 27.33 | 72.67 | -     | -    | -    | -    | -     | -     | -     | -     | -     | -     | -     | -     | -     | C-20 |
| C-21 | -    | 100   | -     | -     | -    | -    | -    | -     | -     | -     | -     | -     | -     | -     | -     | -     | C-21 |
| C-22 | -    | 33.23 | 66.77 | -     | -    | -    | -    | -     | -     | -     | -     | -     | -     | -     | -     | -     | C-22 |
| C-23 | -    | 39.97 | 60.03 | -     | -    | -    | -    | -     | -     | -     | -     | -     | -     | -     | -     | -     | C-23 |
| C-24 | -    | -     | -     | -     | -    | -    | -    | -     | -     | -     | -     | -     | -     | -     | -     | -     | C-24 |
| C-25 | -    | 100   | -     | -     | -    | -    | -    | -     | -     | -     | -     | -     | -     | -     | -     | -     | C-25 |
| C-26 | -    | -     | -     | -     | -    | -    | -    | -     | -     | -     | -     | -     | -     | -     | -     | -     | C-26 |
| C-27 | -    | -     | -     | -     | -    | -    | -    | -     | -     | -     | -     | -     | -     | -     | -     | -     | C-27 |
| C-28 | -    | -     | -     | -     | -    | -    | -    | -     | -     | -     | -     | -     | -     | -     | -     | -     | C-28 |
| C-29 | -    | -     | -     | -     | -    | -    | -    | -     | -     | -     | -     | -     | -     | -     | -     | -     | C-29 |
| C-30 | -    | -     | -     | -     | -    | -    | -    | -     | -     | -     | -     | -     | -     | -     | -     | -     | C-30 |

Distribution of Cl-homologues per carbon-chain length (%)

Compound class: Chlorinated triolefin (CtriO)

Sample: Sewage sludge

Code: P1

|      | Cl-3 | Cl-4  | Cl-5  | Cl-6  | Cl-7 | Cl-8 | Cl-9 | Cl-10 | Cl-11 | Cl-12 | Cl-13 | Cl-14 | Cl-15 | Cl-16 | Cl-17 | Cl-18 |      |
|------|------|-------|-------|-------|------|------|------|-------|-------|-------|-------|-------|-------|-------|-------|-------|------|
| C-9  | -    | -     | -     | -     | -    | -    | -    | -     | -     | -     | -     | -     | -     | -     | -     | -     | C-9  |
| C-10 | -    | -     | -     | -     | -    | -    | -    | -     | -     | -     | -     | -     | -     | -     | -     | -     | C-10 |
| C-11 | -    | -     | -     | -     | -    | -    | -    | -     | -     | -     | -     | -     | -     | -     | -     | -     | C-11 |
| C-12 | -    | -     | -     | -     | -    | -    | -    | -     | -     | -     | -     | -     | -     | -     | -     | -     | C-12 |
| C-13 | -    | -     | -     | -     | -    | -    | -    | -     | -     | -     | -     | -     | -     | -     | -     | -     | C-13 |
| C-14 | -    | -     | -     | -     | 100  | -    | -    | -     | -     | -     | -     | -     | -     | -     | -     | -     | C-14 |
| C-15 | -    | 43.99 | 56.01 | -     | -    | -    | -    | -     | -     | -     | -     | -     | -     | -     | -     | -     | C-15 |
| C-16 | -    | 34.76 | 65.24 | -     | -    | -    | -    | -     | -     | -     | -     | -     | -     | -     | -     | -     | C-16 |
| C-17 | -    | 35.24 | 64.76 | -     | -    | -    | -    | -     | -     | -     | -     | -     | -     | -     | -     | -     | C-17 |
| C-18 | -    | 24.42 | 50.10 | 25.47 | -    | -    | -    | -     | -     | -     | -     | -     | -     | -     | -     | -     | C-18 |
| C-19 | -    | 33.58 | 66.42 | -     | -    | -    | -    | -     | -     | -     | -     | -     | -     | -     | -     | -     | C-19 |
| C-20 | -    | 27.36 | 44.28 | 28.36 | -    | -    | -    | -     | -     | -     | -     | -     | -     | -     | -     | -     | C-20 |
| C-21 | -    | 45.95 | 54.05 | -     | -    | -    | -    | -     | -     | -     | -     | -     | -     | -     | -     | -     | C-21 |
| C-22 | -    | 50.35 | 49.65 | -     | -    | -    | -    | -     | -     | -     | -     | -     | -     | -     | -     | -     | C-22 |
| C-23 | -    | 48.65 | 51.35 | -     | -    | -    | -    | -     | -     | -     | -     | -     | -     | -     | -     | -     | C-23 |
| C-24 | -    | 54.76 | 45.24 | -     | -    | -    | -    | -     | -     | -     | -     | -     | -     | -     | -     | -     | C-24 |
| C-25 | -    | 100   | -     | -     | -    | -    | -    | -     | -     | -     | -     | -     | -     | -     | -     | -     | C-25 |
| C-26 | -    | -     | -     | -     | -    | -    | -    | -     | -     | -     | -     | -     | -     | -     | -     | -     | C-26 |
| C-27 | -    | -     | -     | -     | -    | -    | -    | -     | -     | -     | -     | -     | -     | -     | -     | -     | C-27 |
| C-28 | -    | -     | -     | -     | -    | -    | -    | -     | -     | -     | -     | -     | -     | -     | -     | -     | C-28 |
| C-29 | -    | -     | -     | -     | -    | -    | -    | -     | -     | -     | -     | -     | -     | -     | -     | -     | C-29 |
| C-30 | -    | -     | -     | -     | -    | -    | -    | -     | -     | -     | -     | -     | -     | -     | -     | -     | C-30 |



**Table S11.** Distributions of Cl-homologues (%) per carbon-chain length of CPs, COs, CdiOs and CtriOs compound classes in the yoga mat (P2). Data were evaluated by CP-Hunter. Highlighted are the most abundant Cl-homologues per chain length.

Distribution of Cl-homologues per carbon-chain length (%)

Compound class: Chlorinated paraffin (CP)

Sample: Yoga mat

Code: P2

|      | Cl-3 | Cl-4 | Cl-5  | Cl-6         | Cl-7         | Cl-8  | Cl-9  | Cl-10 | Cl-11 | Cl-12 | Cl-13 | Cl-14 | Cl-15 | Cl-16 | Cl-17 | Cl-18 |      |
|------|------|------|-------|--------------|--------------|-------|-------|-------|-------|-------|-------|-------|-------|-------|-------|-------|------|
| C-9  | -    | -    | -     | -            | -            | -     | -     | -     | -     | -     | -     | -     | -     | -     | -     | -     | C-9  |
| C-10 | -    | -    | -     | <b>85.27</b> | 14.73        | -     | -     | -     | -     | -     | -     | -     | -     | -     | -     | -     | C-10 |
| C-11 | -    | -    | 17.10 | <b>47.21</b> | 29.50        | 6.20  | -     | -     | -     | -     | -     | -     | -     | -     | -     | -     | C-11 |
| C-12 | -    | 0.52 | 15.47 | <b>40.52</b> | 31.73        | 10.22 | 1.53  | -     | -     | -     | -     | -     | -     | -     | -     | -     | C-12 |
| C-13 | -    | 0.71 | 13.40 | <b>35.19</b> | 32.71        | 14.18 | 3.33  | 0.47  | -     | -     | -     | -     | -     | -     | -     | -     | C-13 |
| C-14 | -    | 0.82 | 11.04 | 28.75        | <b>31.54</b> | 19.39 | 6.85  | 1.43  | 0.18  | 0.00  | -     | -     | -     | -     | -     | -     | C-14 |
| C-15 | -    | 0.91 | 8.89  | 23.90        | <b>29.21</b> | 22.33 | 10.96 | 3.18  | 0.57  | 0.06  | -     | -     | -     | -     | -     | -     | C-15 |
| C-16 | -    | 0.94 | 7.91  | 21.21        | <b>27.59</b> | 22.44 | 13.08 | 5.32  | 1.34  | 0.18  | -     | -     | -     | -     | -     | -     | C-16 |
| C-17 | -    | 0.98 | 7.18  | 18.34        | <b>25.42</b> | 23.07 | 14.88 | 7.14  | 2.43  | 0.53  | 0.03  | -     | -     | -     | -     | -     | C-17 |
| C-18 | -    | 0.96 | 6.53  | 17.60        | <b>23.30</b> | 22.19 | 16.19 | 8.64  | 3.49  | 1.03  | 0.08  | -     | -     | -     | -     | -     | C-18 |
| C-19 | -    | 1.04 | 5.95  | 16.45        | <b>22.90</b> | 21.26 | 16.02 | 9.99  | 4.50  | 1.89  | -     | -     | -     | -     | -     | -     | C-19 |
| C-20 | -    | -    | 5.61  | 16.78        | <b>24.42</b> | 24.01 | 17.52 | 9.90  | 1.76  | -     | -     | -     | -     | -     | -     | -     | C-20 |
| C-21 | -    | -    | -     | -            | -            | -     | -     | -     | -     | -     | -     | -     | -     | -     | -     | -     | C-21 |
| C-22 | -    | -    | -     | -            | -            | -     | -     | -     | -     | -     | -     | -     | -     | -     | -     | -     | C-22 |
| C-23 | -    | -    | -     | -            | -            | -     | -     | -     | -     | -     | -     | -     | -     | -     | -     | -     | C-23 |
| C-24 | -    | -    | -     | -            | -            | -     | -     | -     | -     | -     | -     | -     | -     | -     | -     | -     | C-24 |
| C-25 | -    | -    | -     | -            | -            | -     | -     | -     | -     | -     | -     | -     | -     | -     | -     | -     | C-25 |
| C-26 | -    | -    | -     | -            | -            | -     | -     | -     | -     | -     | -     | -     | -     | -     | -     | -     | C-26 |
| C-27 | -    | -    | -     | -            | -            | -     | -     | -     | -     | -     | -     | -     | -     | -     | -     | -     | C-27 |
| C-28 | -    | -    | -     | -            | -            | -     | -     | -     | -     | -     | -     | -     | -     | -     | -     | -     | C-28 |
| C-29 | -    | -    | -     | -            | -            | -     | -     | -     | -     | -     | -     | -     | -     | -     | -     | -     | C-29 |
| C-30 | -    | -    | -     | -            | -            | -     | -     | -     | -     | -     | -     | -     | -     | -     | -     | -     | C-30 |

Distribution of Cl-homologues per carbon-chain length (%)

Compound class: Chlorinated olefin (CO)

Sample: Yoga mat

Code: P2

|      | Cl-3 | Cl-4 | Cl-5  | Cl-6         | Cl-7         | Cl-8  | Cl-9 | Cl-10 | Cl-11 | Cl-12 | Cl-13 | Cl-14 | Cl-15 | Cl-16 | Cl-17 | Cl-18 |      |
|------|------|------|-------|--------------|--------------|-------|------|-------|-------|-------|-------|-------|-------|-------|-------|-------|------|
| C-9  | -    | -    | -     | -            | -            | -     | -    | -     | -     | -     | -     | -     | -     | -     | -     | -     | C-9  |
| C-10 | -    | -    | -     | -            | -            | -     | -    | -     | -     | -     | -     | -     | -     | -     | -     | -     | C-10 |
| C-11 | -    | -    | 33.29 | <b>66.71</b> | -            | -     | -    | -     | -     | -     | -     | -     | -     | -     | -     | -     | C-11 |
| C-12 | -    | 3.06 | 31.32 | <b>46.96</b> | 17.40        | 1.26  | -    | -     | -     | -     | -     | -     | -     | -     | -     | -     | C-12 |
| C-13 | -    | 3.31 | 27.56 | <b>40.77</b> | 22.28        | 5.78  | 0.29 | -     | -     | -     | -     | -     | -     | -     | -     | -     | C-13 |
| C-14 | -    | 3.04 | 22.27 | <b>35.72</b> | 27.62        | 9.54  | 1.72 | 0.08  | -     | -     | -     | -     | -     | -     | -     | -     | C-14 |
| C-15 | -    | 2.61 | 17.53 | <b>32.47</b> | 29.57        | 13.20 | 4.08 | 0.53  | -     | -     | -     | -     | -     | -     | -     | -     | C-15 |
| C-16 | -    | 2.50 | 14.68 | <b>29.22</b> | 28.96        | 16.22 | 6.67 | 1.45  | 0.03  | 0.27  | -     | -     | -     | -     | -     | -     | C-16 |
| C-17 | -    | 2.56 | 13.67 | 26.32        | <b>27.42</b> | 18.57 | 8.54 | 2.36  | 0.56  | -     | -     | -     | -     | -     | -     | -     | C-17 |
| C-18 | -    | 2.62 | 13.46 | 25.48        | <b>26.14</b> | 19.53 | 9.81 | 2.95  | -     | -     | -     | -     | -     | -     | -     | -     | C-18 |
| C-19 | -    | -    | 13.81 | 26.58        | <b>28.79</b> | 20.97 | 9.85 | -     | -     | -     | -     | -     | -     | -     | -     | -     | C-19 |
| C-20 | -    | -    | -     | -            | -            | -     | -    | -     | -     | -     | -     | -     | -     | -     | -     | -     | C-20 |
| C-21 | -    | -    | -     | -            | -            | -     | -    | -     | -     | -     | -     | -     | -     | -     | -     | -     | C-21 |
| C-22 | -    | -    | -     | -            | -            | -     | -    | -     | -     | -     | -     | -     | -     | -     | -     | -     | C-22 |
| C-23 | -    | -    | -     | -            | -            | -     | -    | -     | -     | -     | -     | -     | -     | -     | -     | -     | C-23 |
| C-24 | -    | -    | -     | -            | -            | -     | -    | -     | -     | -     | -     | -     | -     | -     | -     | -     | C-24 |
| C-25 | -    | -    | -     | -            | -            | -     | -    | -     | -     | -     | -     | -     | -     | -     | -     | -     | C-25 |
| C-26 | -    | -    | -     | -            | -            | -     | -    | -     | -     | -     | -     | -     | -     | -     | -     | -     | C-26 |
| C-27 | -    | -    | -     | -            | -            | -     | -    | -     | -     | -     | -     | -     | -     | -     | -     | -     | C-27 |
| C-28 | -    | -    | -     | -            | -            | -     | -    | -     | -     | -     | -     | -     | -     | -     | -     | -     | C-28 |
| C-29 | -    | -    | -     | -            | -            | -     | -    | -     | -     | -     | -     | -     | -     | -     | -     | -     | C-29 |
| C-30 | -    | -    | -     | -            | -            | -     | -    | -     | -     | -     | -     | -     | -     | -     | -     | -     | C-30 |

Distribution of Cl-homologues per carbon-chain length (%)

Compound class: Chlorinated diolefin (CdiO)

Sample: Yoga mat

Code: P2

|      | Cl-3 | Cl-4 | Cl-5  | Cl-6  | Cl-7  | Cl-8 | Cl-9 | Cl-10 | Cl-11 | Cl-12 | Cl-13 | Cl-14 | Cl-15 | Cl-16 | Cl-17 | Cl-18 |      |
|------|------|------|-------|-------|-------|------|------|-------|-------|-------|-------|-------|-------|-------|-------|-------|------|
| C-9  | -    | -    | -     | -     | -     | -    | -    | -     | -     | -     | -     | -     | -     | -     | -     | -     | C-9  |
| C-10 | -    | -    | -     | -     | -     | -    | -    | -     | -     | -     | -     | -     | -     | -     | -     | -     | C-10 |
| C-11 | -    | -    | -     | -     | -     | -    | -    | -     | -     | -     | -     | -     | -     | -     | -     | -     | C-11 |
| C-12 | -    | -    | 100   | -     | -     | -    | -    | -     | -     | -     | -     | -     | -     | -     | -     | -     | C-12 |
| C-13 | -    | 7.94 | 50.51 | 38.04 | 3.50  | -    | -    | -     | -     | -     | -     | -     | -     | -     | -     | -     | C-13 |
| C-14 | -    | 8.17 | 42.35 | 38.22 | 11.26 | -    | -    | -     | -     | -     | -     | -     | -     | -     | -     | -     | C-14 |
| C-15 | -    | 7.10 | 37.38 | 42.59 | 12.92 | -    | -    | -     | -     | -     | -     | -     | -     | -     | -     | -     | C-15 |
| C-16 | -    | 6.29 | 32.13 | 39.34 | 22.24 | -    | -    | -     | -     | -     | -     | -     | -     | -     | -     | -     | C-16 |
| C-17 | -    | 6.84 | 26.96 | 35.65 | 23.37 | 7.19 | -    | -     | -     | -     | -     | -     | -     | -     | -     | -     | C-17 |
| C-18 | -    | 4.64 | 27.07 | 36.98 | 23.43 | 7.88 | -    | -     | -     | -     | -     | -     | -     | -     | -     | -     | C-18 |
| C-19 | -    | -    | 35.36 | 37.94 | 23.23 | 3.47 | -    | -     | -     | -     | -     | -     | -     | -     | -     | -     | C-19 |
| C-20 | -    | -    | -     | -     | -     | -    | -    | -     | -     | -     | -     | -     | -     | -     | -     | -     | C-20 |
| C-21 | -    | -    | -     | -     | -     | -    | -    | -     | -     | -     | -     | -     | -     | -     | -     | -     | C-21 |
| C-22 | -    | -    | -     | -     | -     | -    | -    | -     | -     | -     | -     | -     | -     | -     | -     | -     | C-22 |
| C-23 | -    | -    | -     | -     | -     | -    | -    | -     | -     | -     | -     | -     | -     | -     | -     | -     | C-23 |
| C-24 | -    | -    | -     | -     | -     | -    | -    | -     | -     | -     | -     | -     | -     | -     | -     | -     | C-24 |
| C-25 | -    | -    | -     | -     | -     | -    | -    | -     | -     | -     | -     | -     | -     | -     | -     | -     | C-25 |
| C-26 | -    | -    | -     | -     | -     | -    | -    | -     | -     | -     | -     | -     | -     | -     | -     | -     | C-26 |
| C-27 | -    | -    | -     | -     | -     | -    | -    | -     | -     | -     | -     | -     | -     | -     | -     | -     | C-27 |
| C-28 | -    | -    | -     | -     | -     | -    | -    | -     | -     | -     | -     | -     | -     | -     | -     | -     | C-28 |
| C-29 | -    | -    | -     | -     | -     | -    | -    | -     | -     | -     | -     | -     | -     | -     | -     | -     | C-29 |
| C-30 | -    | -    | -     | -     | -     | -    | -    | -     | -     | -     | -     | -     | -     | -     | -     | -     | C-30 |
|      | Cl-3 | Cl-4 | Cl-5  | Cl-6  | Cl-7  | Cl-8 | Cl-9 | Cl-10 | Cl-11 | Cl-12 | Cl-13 | Cl-14 | Cl-15 | Cl-16 | Cl-17 | Cl-18 |      |

Distribution of Cl-homologues per carbon-chain length (%)

Compound class: Chlorinated triolefin (CtriO)

Sample: Yoga mat

Code: P2

|      | Cl-3 | Cl-4 | Cl-5  | Cl-6  | Cl-7  | Cl-8 | Cl-9 | Cl-10 | Cl-11 | Cl-12 | Cl-13 | Cl-14 | Cl-15 | Cl-16 | Cl-17 | Cl-18 |      |
|------|------|------|-------|-------|-------|------|------|-------|-------|-------|-------|-------|-------|-------|-------|-------|------|
| C-9  | -    | -    | -     | -     | -     | -    | -    | -     | -     | -     | -     | -     | -     | -     | -     | -     | C-9  |
| C-10 | -    | -    | -     | -     | -     | -    | -    | -     | -     | -     | -     | -     | -     | -     | -     | -     | C-10 |
| C-11 | -    | -    | -     | -     | -     | -    | -    | -     | -     | -     | -     | -     | -     | -     | -     | -     | C-11 |
| C-12 | -    | -    | -     | -     | -     | -    | -    | -     | -     | -     | -     | -     | -     | -     | -     | -     | C-12 |
| C-13 | -    | -    | -     | -     | -     | -    | -    | -     | -     | -     | -     | -     | -     | -     | -     | -     | C-13 |
| C-14 | -    | -    | 89.06 | 10.94 | -     | -    | -    | -     | -     | -     | -     | -     | -     | -     | -     | -     | C-14 |
| C-15 | -    | 7.40 | 64.61 | 28.00 | -     | -    | -    | -     | -     | -     | -     | -     | -     | -     | -     | -     | C-15 |
| C-16 | -    | 7.41 | 52.69 | 39.90 | -     | -    | -    | -     | -     | -     | -     | -     | -     | -     | -     | -     | C-16 |
| C-17 | -    | 6.88 | 42.81 | 38.52 | 11.80 | -    | -    | -     | -     | -     | -     | -     | -     | -     | -     | -     | C-17 |
| C-18 | -    | -    | 44.67 | 43.04 | 12.29 | -    | -    | -     | -     | -     | -     | -     | -     | -     | -     | -     | C-18 |
| C-19 | -    | -    | -     | -     | -     | -    | -    | -     | -     | -     | -     | -     | -     | -     | -     | -     | C-19 |
| C-20 | -    | -    | -     | -     | -     | -    | -    | -     | -     | -     | -     | -     | -     | -     | -     | -     | C-20 |
| C-21 | -    | -    | -     | -     | -     | -    | -    | -     | -     | -     | -     | -     | -     | -     | -     | -     | C-21 |
| C-22 | -    | -    | -     | -     | -     | -    | -    | -     | -     | -     | -     | -     | -     | -     | -     | -     | C-22 |
| C-23 | -    | -    | -     | -     | -     | -    | -    | -     | -     | -     | -     | -     | -     | -     | -     | -     | C-23 |
| C-24 | -    | -    | -     | -     | -     | -    | -    | -     | -     | -     | -     | -     | -     | -     | -     | -     | C-24 |
| C-25 | -    | -    | -     | -     | -     | -    | -    | -     | -     | -     | -     | -     | -     | -     | -     | -     | C-25 |
| C-26 | -    | -    | -     | -     | -     | -    | -    | -     | -     | -     | -     | -     | -     | -     | -     | -     | C-26 |
| C-27 | -    | -    | -     | -     | -     | -    | -    | -     | -     | -     | -     | -     | -     | -     | -     | -     | C-27 |
| C-28 | -    | -    | -     | -     | -     | -    | -    | -     | -     | -     | -     | -     | -     | -     | -     | -     | C-28 |
| C-29 | -    | -    | -     | -     | -     | -    | -    | -     | -     | -     | -     | -     | -     | -     | -     | -     | C-29 |
| C-30 | -    | -    | -     | -     | -     | -    | -    | -     | -     | -     | -     | -     | -     | -     | -     | -     | C-30 |
|      | Cl-3 | Cl-4 | Cl-5  | Cl-6  | Cl-7  | Cl-8 | Cl-9 | Cl-10 | Cl-11 | Cl-12 | Cl-13 | Cl-14 | Cl-15 | Cl-16 | Cl-17 | Cl-18 |      |

**Table S12.** Distributions of Cl-homologues (%) per carbon-chain length of CPs, COs, CdiOs and CtriOs compound classes in the coating of an electronic cable (P3). Data were evaluated by CP-Hunter. Highlighted are the most abundant Cl-homologues per chain length.

Distribution of Cl-homologues per carbon-chain length (%)

Compound class: Chlorinated paraffin (CP)

Sample: Coating of an electronic cable

Code: P3

|      | Cl-3 | Cl-4 | Cl-5  | Cl-6         | Cl-7         | Cl-8  | Cl-9  | Cl-10 | Cl-11 | Cl-12 | Cl-13 | Cl-14 | Cl-15 | Cl-16 | Cl-17 | Cl-18 |      |
|------|------|------|-------|--------------|--------------|-------|-------|-------|-------|-------|-------|-------|-------|-------|-------|-------|------|
| C-9  | -    | -    | 10.67 | <b>62.20</b> | 27.13        | -     | -     | -     | -     | -     | -     | -     | -     | -     | -     | -     | C-9  |
| C-10 | -    | -    | 18.32 | <b>48.75</b> | 27.08        | 5.71  | 0.14  | -     | -     | -     | -     | -     | -     | -     | -     | -     | C-10 |
| C-11 | -    | 0.45 | 19.04 | <b>44.04</b> | 27.78        | 7.57  | 1.11  | -     | -     | -     | -     | -     | -     | -     | -     | -     | C-11 |
| C-12 | -    | 0.71 | 17.86 | <b>40.58</b> | 29.35        | 9.55  | 1.87  | 0.08  | -     | -     | -     | -     | -     | -     | -     | -     | C-12 |
| C-13 | -    | 0.90 | 15.39 | <b>35.56</b> | 30.92        | 13.54 | 3.18  | 0.49  | 0.02  | -     | -     | -     | -     | -     | -     | -     | C-13 |
| C-14 | -    | 1.06 | 13.98 | <b>32.22</b> | 30.69        | 16.25 | 4.77  | 0.91  | 0.12  | -     | -     | -     | -     | -     | -     | -     | C-14 |
| C-15 | -    | 1.04 | 11.59 | 29.58        | <b>30.22</b> | 18.08 | 7.24  | 1.91  | 0.34  | -     | -     | -     | -     | -     | -     | -     | C-15 |
| C-16 | -    | 1.33 | 11.17 | 26.44        | <b>28.98</b> | 19.48 | 8.87  | 3.05  | 0.69  | -     | -     | -     | -     | -     | -     | -     | C-16 |
| C-17 | -    | 1.80 | 12.56 | 26.02        | <b>26.88</b> | 18.92 | 9.36  | 3.46  | 0.96  | 0.05  | -     | -     | -     | -     | -     | -     | C-17 |
| C-18 | -    | 2.61 | 15.08 | <b>28.14</b> | 25.82        | 16.25 | 8.08  | 3.02  | 0.86  | 0.15  | -     | -     | -     | -     | -     | -     | C-18 |
| C-19 | -    | 3.47 | 17.44 | <b>30.14</b> | 25.92        | 14.21 | 6.19  | 2.14  | 0.49  | -     | -     | -     | -     | -     | -     | -     | C-19 |
| C-20 | 0.08 | 3.54 | 18.01 | <b>29.78</b> | 25.91        | 14.56 | 5.77  | 1.90  | 0.44  | -     | -     | -     | -     | -     | -     | -     | C-20 |
| C-21 | 0.11 | 3.36 | 17.07 | <b>30.99</b> | 25.86        | 14.52 | 5.79  | 1.86  | 0.45  | -     | -     | -     | -     | -     | -     | -     | C-21 |
| C-22 | 0.11 | 3.22 | 15.78 | <b>30.14</b> | 26.83        | 14.80 | 6.56  | 2.05  | 0.52  | -     | -     | -     | -     | -     | -     | -     | C-22 |
| C-23 | -    | 2.87 | 14.93 | <b>28.73</b> | 27.15        | 16.10 | 7.08  | 2.49  | 0.65  | -     | -     | -     | -     | -     | -     | -     | C-23 |
| C-24 | -    | 2.48 | 13.01 | <b>27.81</b> | 26.75        | 17.73 | 8.21  | 3.16  | 0.86  | -     | -     | -     | -     | -     | -     | -     | C-24 |
| C-25 | 0.66 | 1.95 | 11.43 | 25.58        | <b>27.59</b> | 18.57 | 9.89  | 3.63  | 0.70  | -     | -     | -     | -     | -     | -     | -     | C-25 |
| C-26 | -    | -    | 10.64 | 25.38        | <b>29.12</b> | 19.98 | 11.06 | 3.83  | -     | -     | -     | -     | -     | -     | -     | -     | C-26 |
| C-27 | -    | -    | 9.33  | 29.19        | <b>29.66</b> | 20.12 | 11.69 | -     | -     | -     | -     | -     | -     | -     | -     | -     | C-27 |
| C-28 | -    | -    | -     | <b>55.99</b> | 44.01        | -     | -     | -     | -     | -     | -     | -     | -     | -     | -     | -     | C-28 |
| C-29 | -    | -    | -     | -            | -            | -     | -     | -     | -     | -     | -     | -     | -     | -     | -     | -     | C-29 |
| C-30 | -    | -    | -     | -            | -            | -     | -     | -     | -     | -     | -     | -     | -     | -     | -     | -     | C-30 |

Distribution of Cl-homologues per carbon-chain length (%)

Compound class: Chlorinated olefin (CO)

Sample: Coating of an electronic cable

Code: P3

|      | Cl-3 | Cl-4 | Cl-5  | Cl-6         | Cl-7         | Cl-8  | Cl-9  | Cl-10 | Cl-11 | Cl-12 | Cl-13 | Cl-14 | Cl-15 | Cl-16 | Cl-17 | Cl-18 |      |
|------|------|------|-------|--------------|--------------|-------|-------|-------|-------|-------|-------|-------|-------|-------|-------|-------|------|
| C-9  | -    | -    | -     | -            | -            | -     | -     | -     | -     | -     | -     | -     | -     | -     | -     | -     | C-9  |
| C-10 | -    | -    | 43.13 | <b>47.04</b> | 9.82         | -     | -     | -     | -     | -     | -     | -     | -     | -     | -     | -     | C-10 |
| C-11 | -    | 3.46 | 35.87 | <b>44.77</b> | 15.91        | -     | -     | -     | -     | -     | -     | -     | -     | -     | -     | -     | C-11 |
| C-12 | -    | 3.48 | 32.53 | <b>44.14</b> | 17.33        | 2.51  | -     | -     | -     | -     | -     | -     | -     | -     | -     | -     | C-12 |
| C-13 | -    | 3.63 | 29.47 | <b>40.62</b> | 20.91        | 5.05  | 0.33  | -     | -     | -     | -     | -     | -     | -     | -     | -     | C-13 |
| C-14 | -    | 3.93 | 27.28 | <b>38.15</b> | 23.20        | 6.48  | 0.96  | -     | -     | -     | -     | -     | -     | -     | -     | -     | C-14 |
| C-15 | -    | 3.69 | 23.23 | <b>36.29</b> | 25.51        | 9.07  | 2.20  | -     | -     | -     | -     | -     | -     | -     | -     | -     | C-15 |
| C-16 | -    | 4.08 | 21.33 | <b>34.10</b> | 26.04        | 11.21 | 3.25  | -     | -     | -     | -     | -     | -     | -     | -     | -     | C-16 |
| C-17 | -    | 4.90 | 21.31 | <b>32.62</b> | 24.74        | 12.00 | 3.92  | 0.50  | -     | -     | -     | -     | -     | -     | -     | -     | C-17 |
| C-18 | -    | 6.33 | 22.19 | <b>31.47</b> | 23.52        | 11.96 | 4.00  | 0.54  | -     | -     | -     | -     | -     | -     | -     | -     | C-18 |
| C-19 | -    | 7.00 | 22.50 | <b>30.14</b> | 23.20        | 12.03 | 4.22  | 0.74  | 0.17  | -     | -     | -     | -     | -     | -     | -     | C-19 |
| C-20 | -    | 6.64 | 21.51 | <b>28.30</b> | 23.64        | 13.58 | 5.39  | 0.93  | -     | -     | -     | -     | -     | -     | -     | -     | C-20 |
| C-21 | -    | 6.77 | 20.87 | <b>29.13</b> | 24.17        | 13.20 | 5.04  | 0.81  | -     | -     | -     | -     | -     | -     | -     | -     | C-21 |
| C-22 | -    | 6.02 | 18.87 | <b>28.46</b> | 25.32        | 14.21 | 5.84  | 1.28  | -     | -     | -     | -     | -     | -     | -     | -     | C-22 |
| C-23 | -    | 4.64 | 16.41 | <b>27.24</b> | 26.26        | 16.19 | 7.16  | 2.10  | -     | -     | -     | -     | -     | -     | -     | -     | C-23 |
| C-24 | -    | 3.21 | 13.47 | <b>25.75</b> | <b>26.28</b> | 19.05 | 8.73  | 3.50  | -     | -     | -     | -     | -     | -     | -     | -     | C-24 |
| C-25 | -    | -    | 11.71 | 24.34        | <b>27.99</b> | 20.89 | 10.55 | 4.52  | -     | -     | -     | -     | -     | -     | -     | -     | C-25 |
| C-26 | -    | -    | 9.91  | 24.28        | <b>31.55</b> | 20.11 | 14.15 | -     | -     | -     | -     | -     | -     | -     | -     | -     | C-26 |
| C-27 | -    | -    | -     | 34.34        | <b>47.66</b> | 17.99 | -     | -     | -     | -     | -     | -     | -     | -     | -     | -     | C-27 |
| C-28 | -    | -    | -     | -            | -            | -     | -     | -     | -     | -     | -     | -     | -     | -     | -     | -     | C-28 |
| C-29 | -    | -    | -     | -            | -            | -     | -     | -     | -     | -     | -     | -     | -     | -     | -     | -     | C-29 |
| C-30 | -    | -    | -     | -            | -            | -     | -     | -     | -     | -     | -     | -     | -     | -     | -     | -     | C-30 |

Distribution of Cl-homologues per carbon-chain length (%)

Compound class: Chlorinated diolefin (CdiO)

Sample: Coating of an electronic cable

Code: P3

|      | Cl-3 | Cl-4  | Cl-5         | Cl-6         | Cl-7         | Cl-8  | Cl-9 | Cl-10 | Cl-11 | Cl-12 | Cl-13 | Cl-14 | Cl-15 | Cl-16 | Cl-17 | Cl-18 |      |
|------|------|-------|--------------|--------------|--------------|-------|------|-------|-------|-------|-------|-------|-------|-------|-------|-------|------|
| C-9  | -    | -     | -            | -            | -            | -     | -    | -     | -     | -     | -     | -     | -     | -     | -     | -     | C-9  |
| C-10 | -    | -     | -            | -            | -            | -     | -    | -     | -     | -     | -     | -     | -     | -     | -     | -     | C-10 |
| C-11 | -    | -     | -            | -            | -            | -     | -    | -     | -     | -     | -     | -     | -     | -     | -     | -     | C-11 |
| C-12 | -    | -     | <b>100</b>   | -            | -            | -     | -    | -     | -     | -     | -     | -     | -     | -     | -     | -     | C-12 |
| C-13 | -    | 8.55  | <b>54.42</b> | 37.03        | -            | -     | -    | -     | -     | -     | -     | -     | -     | -     | -     | -     | C-13 |
| C-14 | -    | 10.23 | <b>47.39</b> | 35.14        | 7.24         | -     | -    | -     | -     | -     | -     | -     | -     | -     | -     | -     | C-14 |
| C-15 | -    | 10.50 | <b>45.48</b> | 38.68        | 5.34         | -     | -    | -     | -     | -     | -     | -     | -     | -     | -     | -     | C-15 |
| C-16 | -    | 9.86  | <b>39.01</b> | 36.77        | 14.36        | -     | -    | -     | -     | -     | -     | -     | -     | -     | -     | -     | C-16 |
| C-17 | -    | 11.07 | 34.57        | <b>35.07</b> | 16.27        | 3.03  | -    | -     | -     | -     | -     | -     | -     | -     | -     | -     | C-17 |
| C-18 | -    | 8.45  | 33.42        | <b>33.83</b> | 17.75        | 6.55  | -    | -     | -     | -     | -     | -     | -     | -     | -     | -     | C-18 |
| C-19 | -    | 13.64 | <b>29.56</b> | 28.17        | 18.30        | 8.06  | 2.26 | -     | -     | -     | -     | -     | -     | -     | -     | -     | C-19 |
| C-20 | -    | 13.93 | <b>26.95</b> | 25.97        | 18.23        | 10.22 | 3.67 | 1.03  | -     | -     | -     | -     | -     | -     | -     | -     | C-20 |
| C-21 | -    | 14.41 | <b>26.67</b> | 26.22        | 18.41        | 9.88  | 3.96 | 0.45  | -     | -     | -     | -     | -     | -     | -     | -     | C-21 |
| C-22 | -    | 14.36 | 24.91        | <b>26.02</b> | 19.98        | 10.74 | 3.99 | -     | -     | -     | -     | -     | -     | -     | -     | -     | C-22 |
| C-23 | -    | 11.95 | 22.63        | <b>25.81</b> | 21.48        | 13.16 | 4.96 | -     | -     | -     | -     | -     | -     | -     | -     | -     | C-23 |
| C-24 | -    | 8.00  | 18.67        | <b>25.90</b> | 24.72        | 14.10 | 7.23 | 1.37  | -     | -     | -     | -     | -     | -     | -     | -     | C-24 |
| C-25 | -    | -     | 16.62        | 30.31        | <b>32.36</b> | 13.45 | 7.27 | -     | -     | -     | -     | -     | -     | -     | -     | -     | C-25 |
| C-26 | -    | -     | -            | <b>50.49</b> | -            | 49.51 | -    | -     | -     | -     | -     | -     | -     | -     | -     | -     | C-26 |
| C-27 | -    | -     | -            | -            | -            | -     | -    | -     | -     | -     | -     | -     | -     | -     | -     | -     | C-27 |
| C-28 | -    | -     | -            | -            | -            | -     | -    | -     | -     | -     | -     | -     | -     | -     | -     | -     | C-28 |
| C-29 | -    | -     | -            | -            | -            | -     | -    | -     | -     | -     | -     | -     | -     | -     | -     | -     | C-29 |
| C-30 | -    | -     | -            | -            | -            | -     | -    | -     | -     | -     | -     | -     | -     | -     | -     | -     | C-30 |

Distribution of Cl-homologues per carbon-chain length (%)

Compound class: Chlorinated triolefin (CtriO)

Sample: Coating of an electronic cable

Code: P3

|      | Cl-3 | Cl-4  | Cl-5         | Cl-6  | Cl-7  | Cl-8  | Cl-9 | Cl-10 | Cl-11 | Cl-12 | Cl-13 | Cl-14 | Cl-15 | Cl-16 | Cl-17 | Cl-18 |      |
|------|------|-------|--------------|-------|-------|-------|------|-------|-------|-------|-------|-------|-------|-------|-------|-------|------|
| C-9  | -    | -     | -            | -     | -     | -     | -    | -     | -     | -     | -     | -     | -     | -     | -     | -     | C-9  |
| C-10 | -    | -     | -            | -     | -     | -     | -    | -     | -     | -     | -     | -     | -     | -     | -     | -     | C-10 |
| C-11 | -    | -     | -            | -     | -     | -     | -    | -     | -     | -     | -     | -     | -     | -     | -     | -     | C-11 |
| C-12 | -    | -     | -            | -     | -     | -     | -    | -     | -     | -     | -     | -     | -     | -     | -     | -     | C-12 |
| C-13 | -    | -     | -            | -     | -     | -     | -    | -     | -     | -     | -     | -     | -     | -     | -     | -     | C-13 |
| C-14 | -    | -     | <b>100</b>   | -     | -     | -     | -    | -     | -     | -     | -     | -     | -     | -     | -     | -     | C-14 |
| C-15 | -    | -     | <b>100</b>   | -     | -     | -     | -    | -     | -     | -     | -     | -     | -     | -     | -     | -     | C-15 |
| C-16 | -    | -     | <b>100</b>   | -     | -     | -     | -    | -     | -     | -     | -     | -     | -     | -     | -     | -     | C-16 |
| C-17 | -    | -     | <b>67.74</b> | 32.26 | -     | -     | -    | -     | -     | -     | -     | -     | -     | -     | -     | -     | C-17 |
| C-18 | -    | 9.07  | <b>60.66</b> | 30.27 | -     | -     | -    | -     | -     | -     | -     | -     | -     | -     | -     | -     | C-18 |
| C-19 | -    | 20.53 | <b>38.41</b> | 29.51 | 11.55 | -     | -    | -     | -     | -     | -     | -     | -     | -     | -     | -     | C-19 |
| C-20 | -    | 19.09 | <b>30.34</b> | 25.04 | 16.37 | 9.16  | -    | -     | -     | -     | -     | -     | -     | -     | -     | -     | C-20 |
| C-21 | -    | 18.88 | <b>29.56</b> | 24.75 | 16.85 | 9.96  | -    | -     | -     | -     | -     | -     | -     | -     | -     | -     | C-21 |
| C-22 | -    | 19.66 | <b>27.16</b> | 24.67 | 16.54 | 10.12 | 1.84 | -     | -     | -     | -     | -     | -     | -     | -     | -     | C-22 |
| C-23 | -    | 24.28 | <b>29.12</b> | 26.74 | 19.86 | -     | -    | -     | -     | -     | -     | -     | -     | -     | -     | -     | C-23 |
| C-24 | -    | 12.04 | <b>45.64</b> | 42.32 | -     | -     | -    | -     | -     | -     | -     | -     | -     | -     | -     | -     | C-24 |
| C-25 | -    | -     | -            | -     | -     | -     | -    | -     | -     | -     | -     | -     | -     | -     | -     | -     | C-25 |
| C-26 | -    | -     | -            | -     | -     | -     | -    | -     | -     | -     | -     | -     | -     | -     | -     | -     | C-26 |
| C-27 | -    | -     | -            | -     | -     | -     | -    | -     | -     | -     | -     | -     | -     | -     | -     | -     | C-27 |
| C-28 | -    | -     | -            | -     | -     | -     | -    | -     | -     | -     | -     | -     | -     | -     | -     | -     | C-28 |
| C-29 | -    | -     | -            | -     | -     | -     | -    | -     | -     | -     | -     | -     | -     | -     | -     | -     | C-29 |
| C-30 | -    | -     | -            | -     | -     | -     | -    | -     | -     | -     | -     | -     | -     | -     | -     | -     | C-30 |

**Table S13.** Chlorine- ( $n_{Cl}$ ) numbers of CPs, COs, CdiOs and CtriOs compound classes for different carbon-chain lengths ( $C_{10-30}$ ) in the sewage sludge (P1). Data were extracted and evaluated by CP-Hunter (top) and RASER (bottom).

| Name                            | Code | C-homologue     | Chlorine number ( $n_{Cl}$ ) |      |      |       |
|---------------------------------|------|-----------------|------------------------------|------|------|-------|
|                                 |      |                 | CP                           | CO   | CdiO | CtriO |
| Sewage sludge<br>(By CP-Hunter) | P1   | C <sub>10</sub> | 6.37                         | 5.82 | -    | -     |
|                                 |      | C <sub>11</sub> | 6.69                         | 6.20 | 5.59 | -     |
|                                 |      | C <sub>12</sub> | 6.96                         | 6.48 | 5.67 | -     |
|                                 |      | C <sub>13</sub> | 6.71                         | 6.60 | 5.83 | -     |
|                                 |      | C <sub>14</sub> | 6.03                         | 5.74 | 5.10 | -     |
|                                 |      | C <sub>15</sub> | 6.11                         | 5.71 | 5.06 | 4.57  |
|                                 |      | C <sub>16</sub> | 6.31                         | 5.83 | 5.15 | 4.62  |
|                                 |      | C <sub>17</sub> | 6.56                         | 5.95 | 5.29 | 4.83  |
|                                 |      | C <sub>18</sub> | 7.01                         | 6.26 | 5.68 | 5.00  |
|                                 |      | C <sub>19</sub> | 7.18                         | 6.30 | 5.46 | 5.02  |
|                                 |      | C <sub>20</sub> | 7.13                         | 6.21 | 5.30 | 5.16  |
|                                 |      | C <sub>21</sub> | 6.99                         | 6.02 | 5.07 | 4.51  |
|                                 |      | C <sub>22</sub> | 7.02                         | 5.95 | 5.04 | 4.47  |
|                                 |      | C <sub>23</sub> | 7.09                         | 6.04 | 4.91 | 5.19  |
|                                 |      | C <sub>24</sub> | 7.27                         | 6.10 | 4.90 | 4.45  |
|                                 |      | C <sub>25</sub> | 7.32                         | 6.08 | -    | -     |
|                                 |      | C <sub>26</sub> | 7.58                         | 6.60 | -    | -     |
|                                 |      | C <sub>27</sub> | 7.68                         | 6.81 | -    | -     |
|                                 |      | C <sub>28</sub> | 7.77                         | 7.09 | -    | -     |
|                                 |      | C <sub>29</sub> | 7.83                         | 7.27 | -    | -     |
|                                 |      | C <sub>30</sub> | 7.89                         | 7.67 | -    | -     |
| Sewage sludge<br>(By RASER)     | P1   | C <sub>10</sub> | 6.39                         | 5.82 | -    | -     |
|                                 |      | C <sub>11</sub> | 6.70                         | 6.22 | 5.00 | -     |
|                                 |      | C <sub>12</sub> | 6.96                         | 6.48 | 5.56 | -     |
|                                 |      | C <sub>13</sub> | 6.71                         | 6.61 | 5.65 | -     |
|                                 |      | C <sub>14</sub> | 6.03                         | 5.73 | 4.72 | 7.00  |
|                                 |      | C <sub>15</sub> | 6.12                         | 5.72 | 5.07 | 4.56  |
|                                 |      | C <sub>16</sub> | 6.32                         | 5.84 | 5.12 | 4.65  |
|                                 |      | C <sub>17</sub> | 6.56                         | 5.96 | 5.19 | 4.65  |
|                                 |      | C <sub>18</sub> | 7.00                         | 6.15 | 5.47 | 5.01  |
|                                 |      | C <sub>19</sub> | 7.18                         | 5.85 | 5.21 | 4.66  |
|                                 |      | C <sub>20</sub> | 7.13                         | 5.78 | 4.73 | 5.01  |
|                                 |      | C <sub>21</sub> | 7.07                         | 5.26 | 4.00 | 4.54  |
|                                 |      | C <sub>22</sub> | 6.97                         | 5.21 | 4.67 | 4.50  |
|                                 |      | C <sub>23</sub> | 7.12                         | 5.26 | 4.60 | 4.51  |
|                                 |      | C <sub>24</sub> | 7.30                         | 5.30 | -    | 4.45  |
|                                 |      | C <sub>25</sub> | 7.43                         | 5.33 | 4.00 | 4.00  |
|                                 |      | C <sub>26</sub> | 7.62                         | 4.72 | -    | -     |
|                                 |      | C <sub>27</sub> | 7.75                         | 5.00 | -    | -     |
|                                 |      | C <sub>28</sub> | 7.82                         | -    | -    | -     |
|                                 |      | C <sub>29</sub> | 7.86                         | -    | -    | -     |
|                                 |      | C <sub>30</sub> | 7.95                         | -    | -    | -     |

**Table S14.** Chlorine- ( $n_{Cl}$ ) numbers of CPs, COs, CdiOs and CtriOs compound classes for different carbon-chain lengths ( $C_{10-30}$ ) in the yoga mat (P2) and coating of an electronic cable (P3). Data were extracted and evaluated by CP-Hunter.

| Name                           | Code | C-homologue     | Chlorine number ( $n_{Cl}$ ) |      |      |       |
|--------------------------------|------|-----------------|------------------------------|------|------|-------|
|                                |      |                 | CP                           | CO   | CdiO | CtriO |
| Yoga mat                       | P2   | C <sub>10</sub> | 6.15                         | -    | -    | -     |
|                                |      | C <sub>11</sub> | 6.25                         | 5.67 | -    | -     |
|                                |      | C <sub>12</sub> | 6.40                         | 5.82 | 5.00 | -     |
|                                |      | C <sub>13</sub> | 6.58                         | 6.01 | 5.37 | -     |
|                                |      | C <sub>14</sub> | 6.85                         | 6.24 | 5.53 | 5.11  |
|                                |      | C <sub>15</sub> | 7.12                         | 6.48 | 5.61 | 5.21  |
|                                |      | C <sub>16</sub> | 7.31                         | 6.69 | 5.78 | 5.32  |
|                                |      | C <sub>17</sub> | 7.51                         | 6.84 | 5.97 | 5.55  |
|                                |      | C <sub>18</sub> | 7.67                         | 6.88 | 6.03 | 5.68  |
|                                |      | C <sub>19</sub> | 7.79                         | 6.86 | 5.95 | -     |
|                                |      | C <sub>20</sub> | 7.68                         | -    | -    | -     |
|                                |      | C <sub>21</sub> | -                            | -    | -    | -     |
|                                |      | C <sub>22</sub> | -                            | -    | -    | -     |
|                                |      | C <sub>23</sub> | -                            | -    | -    | -     |
|                                |      | C <sub>24</sub> | -                            | -    | -    | -     |
|                                |      | C <sub>25</sub> | -                            | -    | -    | -     |
|                                |      | C <sub>26</sub> | -                            | -    | -    | -     |
|                                |      | C <sub>27</sub> | -                            | -    | -    | -     |
|                                |      | C <sub>28</sub> | -                            | -    | -    | -     |
|                                |      | C <sub>29</sub> | -                            | -    | -    | -     |
|                                |      | C <sub>30</sub> | -                            | -    | -    | -     |
| Coating of an electronic cable | P3   | C <sub>10</sub> | 6.21                         | 5.67 | -    | -     |
|                                |      | C <sub>11</sub> | 6.26                         | 5.73 | -    | -     |
|                                |      | C <sub>12</sub> | 6.35                         | 5.83 | 5.00 | -     |
|                                |      | C <sub>13</sub> | 6.52                         | 5.95 | 5.28 | -     |
|                                |      | C <sub>14</sub> | 6.66                         | 6.04 | 5.39 | 5.00  |
|                                |      | C <sub>15</sub> | 6.84                         | 6.20 | 5.39 | 5.00  |
|                                |      | C <sub>16</sub> | 6.96                         | 6.29 | 5.56 | 5.00  |
|                                |      | C <sub>17</sub> | 6.96                         | 6.31 | 5.66 | 5.32  |
|                                |      | C <sub>18</sub> | 6.80                         | 6.27 | 5.81 | 5.21  |
|                                |      | C <sub>19</sub> | 6.60                         | 6.27 | 5.84 | 5.32  |
|                                |      | C <sub>20</sub> | 6.57                         | 6.36 | 5.99 | 5.66  |
|                                |      | C <sub>21</sub> | 6.58                         | 6.35 | 5.96 | 5.69  |
|                                |      | C <sub>22</sub> | 6.64                         | 6.45 | 6.00 | 5.76  |
|                                |      | C <sub>23</sub> | 6.73                         | 6.63 | 6.16 | 5.42  |
|                                |      | C <sub>24</sub> | 6.86                         | 6.85 | 6.45 | 5.30  |
|                                |      | C <sub>25</sub> | 6.95                         | 7.08 | 6.64 | -     |
|                                |      | C <sub>26</sub> | 7.07                         | 7.04 | 6.99 | -     |
|                                |      | C <sub>27</sub> | 6.96                         | 6.84 | -    | -     |
|                                |      | C <sub>28</sub> | 6.44                         | -    | -    | -     |
|                                |      | C <sub>29</sub> | -                            | -    | -    | -     |
|                                |      | C <sub>30</sub> | -                            | -    | -    | -     |

**Table S15.** Carbon- ( $n_c$ ) numbers of CPs, COs, CdiOs and CtriOs compound classes for different chlorination degrees (Cl<sub>3-14</sub>) in the sewage sludge (P1). Data were extracted and evaluated by CP-Hunter (top) and RASER (bottom).

| Name                            | Code  | Cl-homologue                | Carbon number ( $n_c$ ) |                 |       |       |       |       |
|---------------------------------|-------|-----------------------------|-------------------------|-----------------|-------|-------|-------|-------|
|                                 |       |                             | CP                      | CO              | CdiO  | CtriO |       |       |
| Sewage sludge<br>(By CP-Hunter) | P1    | Cl <sub>3</sub>             | 22.53                   | -               | -     | -     |       |       |
|                                 |       | Cl <sub>4</sub>             | 16.55                   | 15.81           | 16.72 | 18.28 |       |       |
|                                 |       | Cl <sub>5</sub>             | 15.54                   | 15.18           | 16.34 | 18.11 |       |       |
|                                 |       | Cl <sub>6</sub>             | 15.41                   | 14.72           | 16.33 | 18.82 |       |       |
|                                 |       | Cl <sub>7</sub>             | 15.69                   | 14.76           | 17.14 | 20.00 |       |       |
|                                 |       | Cl <sub>8</sub>             | 16.63                   | 15.25           | -     | -     |       |       |
|                                 |       | Cl <sub>9</sub>             | 18.24                   | 17.38           | -     | -     |       |       |
|                                 |       | Cl <sub>10</sub>            | 20.37                   | -               | -     | -     |       |       |
|                                 |       | Cl <sub>11</sub>            | 23.28                   | -               | -     | -     |       |       |
|                                 |       | Cl <sub>12</sub>            | 25.61                   | -               | -     | -     |       |       |
|                                 |       | Cl <sub>13</sub>            | 26.00                   | -               | -     | -     |       |       |
|                                 |       | Cl <sub>14</sub>            | -                       | -               | -     | -     |       |       |
|                                 |       | Sewage sludge<br>(By RASER) | P1                      | Cl <sub>3</sub> | 21.38 | -     | -     | -     |
|                                 |       |                             |                         | Cl <sub>4</sub> | 16.55 | 15.92 | 16.63 | 18.49 |
| Cl <sub>5</sub>                 | 15.54 |                             |                         | 15.16           | 16.31 | 18.04 |       |       |
| Cl <sub>6</sub>                 | 15.40 |                             |                         | 14.59           | 16.24 | 18.35 |       |       |
| Cl <sub>7</sub>                 | 15.67 |                             |                         | 14.34           | -     | 14.00 |       |       |
| Cl <sub>8</sub>                 | 16.61 |                             |                         | 14.30           | -     | -     |       |       |
| Cl <sub>9</sub>                 | 18.27 |                             |                         | 13.97           | -     | -     |       |       |
| Cl <sub>10</sub>                | 20.34 |                             |                         | -               | -     | -     |       |       |
| Cl <sub>11</sub>                | 23.50 |                             |                         | -               | -     | -     |       |       |
| Cl <sub>12</sub>                | 26.08 |                             |                         | -               | -     | -     |       |       |
| Cl <sub>13</sub>                | 25.47 |                             |                         | -               | -     | -     |       |       |
| Cl <sub>14</sub>                | 26.00 |                             |                         | -               | -     | -     |       |       |

**Table S16.** Carbon- ( $n_c$ ) numbers of CPs, COs, CdiOs and CtriOs compound classes for different chlorination degrees (Cl<sub>3-14</sub>) in the yoga mat (P2) and coating of an electronic cable (P3).

| Name             | Code  | Cl-homologue                   | Carbon number ( $n_c$ ) |                 |       |       |       |       |
|------------------|-------|--------------------------------|-------------------------|-----------------|-------|-------|-------|-------|
|                  |       |                                | CP                      | CO              | CdiO  | CtriO |       |       |
| Yoga mat         | P2    | Cl <sub>3</sub>                | -                       | -               | -     | -     |       |       |
|                  |       | Cl <sub>4</sub>                | 14.53                   | 14.53           | 15.03 | 16.00 |       |       |
|                  |       | Cl <sub>5</sub>                | 14.14                   | 14.38           | 14.97 | 15.82 |       |       |
|                  |       | Cl <sub>6</sub>                | 14.14                   | 14.49           | 15.20 | 16.36 |       |       |
|                  |       | Cl <sub>7</sub>                | 14.30                   | 14.74           | 15.73 | 17.33 |       |       |
|                  |       | Cl <sub>8</sub>                | 14.58                   | 15.14           | 17.36 | -     |       |       |
|                  |       | Cl <sub>9</sub>                | 14.98                   | 15.71           | -     | -     |       |       |
|                  |       | Cl <sub>10</sub>               | 15.48                   | 16.25           | -     | -     |       |       |
|                  |       | Cl <sub>11</sub>               | 16.11                   | 16.93           | -     | -     |       |       |
|                  |       | Cl <sub>12</sub>               | 16.91                   | 16.00           | -     | -     |       |       |
|                  |       | Cl <sub>13</sub>               | 17.53                   | -               | -     | -     |       |       |
|                  |       | Cl <sub>14</sub>               | -                       | -               | -     | -     |       |       |
|                  |       | Coating of an electronic cable | P3                      | Cl <sub>3</sub> | 21.85 | -     | -     | -     |
|                  |       |                                |                         | Cl <sub>4</sub> | 17.04 | 17.38 | 18.97 | 21.05 |
| Cl <sub>5</sub>  | 15.29 |                                |                         | 16.22           | 17.75 | 19.68 |       |       |
| Cl <sub>6</sub>  | 15.02 |                                |                         | 16.35           | 18.35 | 20.82 |       |       |
| Cl <sub>7</sub>  | 15.14 |                                |                         | 17.08           | 20.05 | 21.13 |       |       |
| Cl <sub>8</sub>  | 15.50 |                                |                         | 18.32           | 21.30 | 21.03 |       |       |
| Cl <sub>9</sub>  | 16.13 |                                |                         | 19.66           | 21.72 | 22.00 |       |       |
| Cl <sub>10</sub> | 16.93 |                                |                         | 21.73           | 21.17 | -     |       |       |
| Cl <sub>11</sub> | 17.69 |                                |                         | 19.00           | -     | -     |       |       |
| Cl <sub>12</sub> | 17.71 |                                |                         | -               | -     | -     |       |       |
| Cl <sub>13</sub> | -     |                                |                         | -               | -     | -     |       |       |
| Cl <sub>14</sub> | -     |                                |                         | -               | -     | -     |       |       |



## **REFERENCES**

- (1) Knobloch, M. C.; Mathis, F.; Diaz, O. M.; Stalder, U.; Bigler, L.; Kern, S.; Bleiner, D.; Heeb, N. V. Selective and Fast Analysis of Chlorinated Paraffins in the Presence of Chlorinated Mono-, Di-, and Tri-Olefins with the R-Based Automated Spectra Evaluation Routine (RASER). *Anal. Chem.* **2022**, *94* (40), 13777-13784. DOI: <https://doi.org/10.1021/acs.analchem.2c02240>.
- (2) Mendo Diaz, O.; Tell, A.; Knobloch, M.; Canonica, E.; Walder, C.; Buser, A. M.; Stalder, U.; Bigler, L.; Kern, S.; Bleiner, D.; et al. Fingerprinting of chlorinated paraffins and their transformation products in plastic consumer products. *Chemosphere* **2023**, *338*, 139552. DOI: <https://doi.org/10.1016/j.chemosphere.2023.139552>.
